# Supplementary material
Source: ML conference proceedings conference paper supplement (https://openreview.net/forum?id=Uynr3iPhksa)

Chunk 1

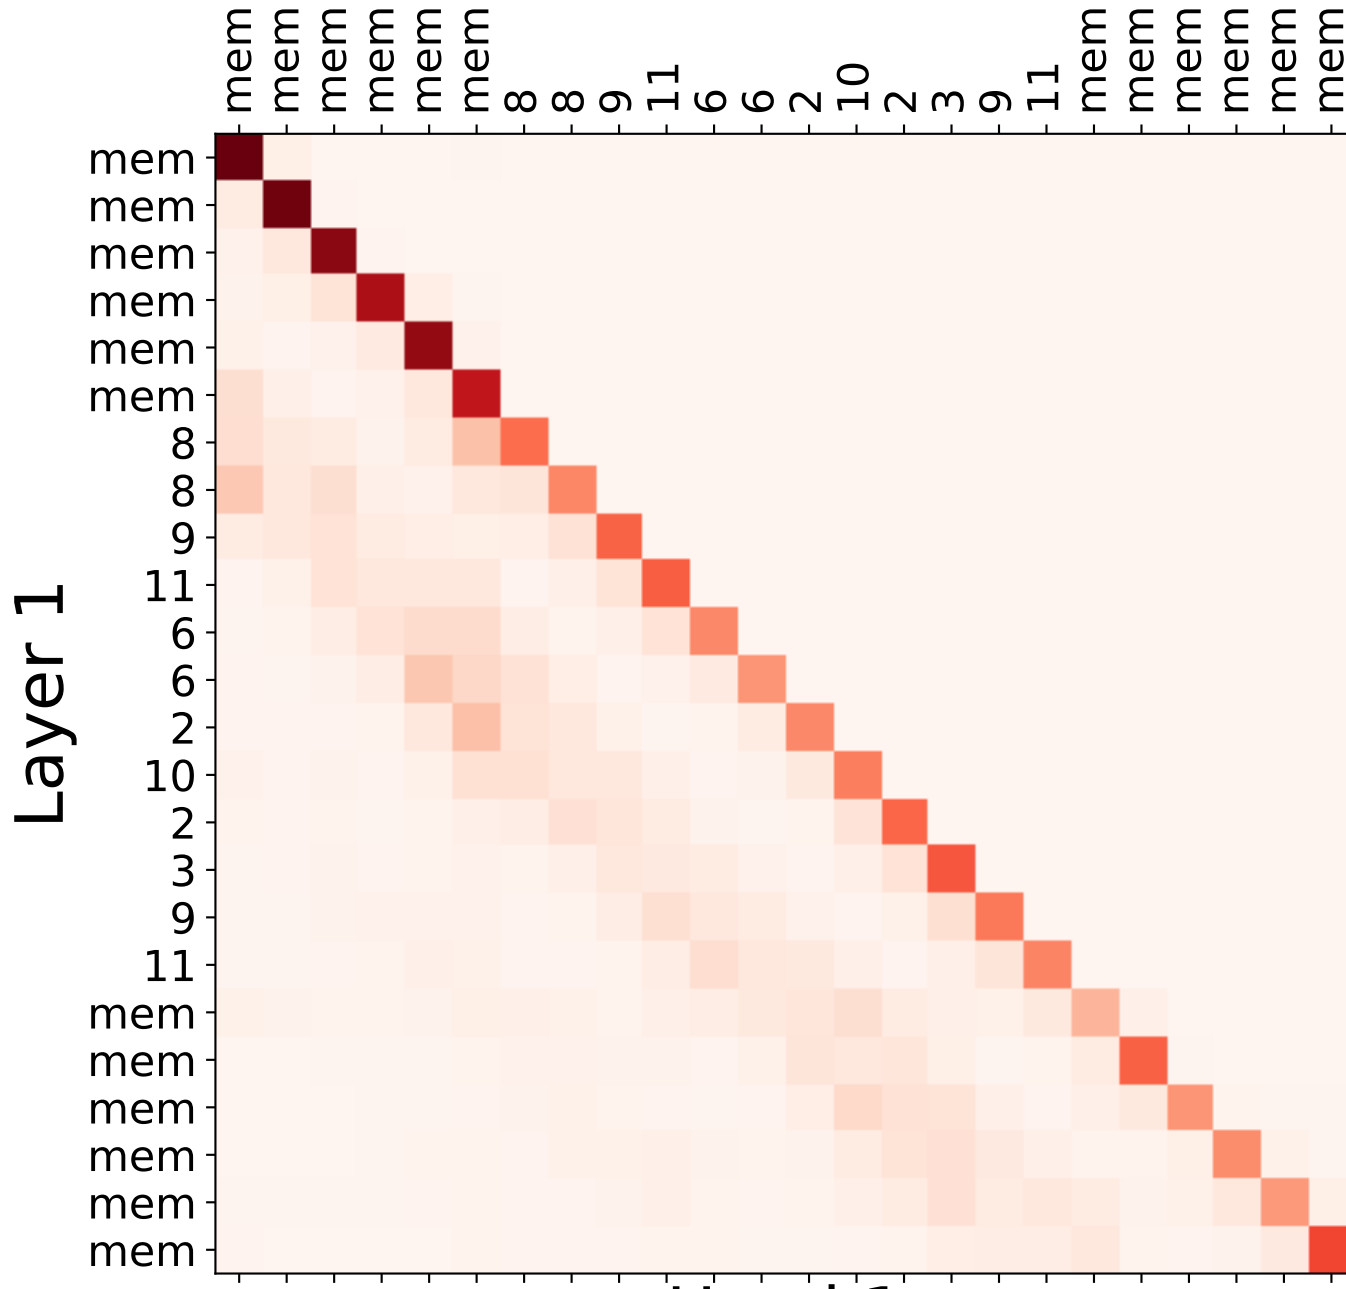

Head 1  
Chunk 1

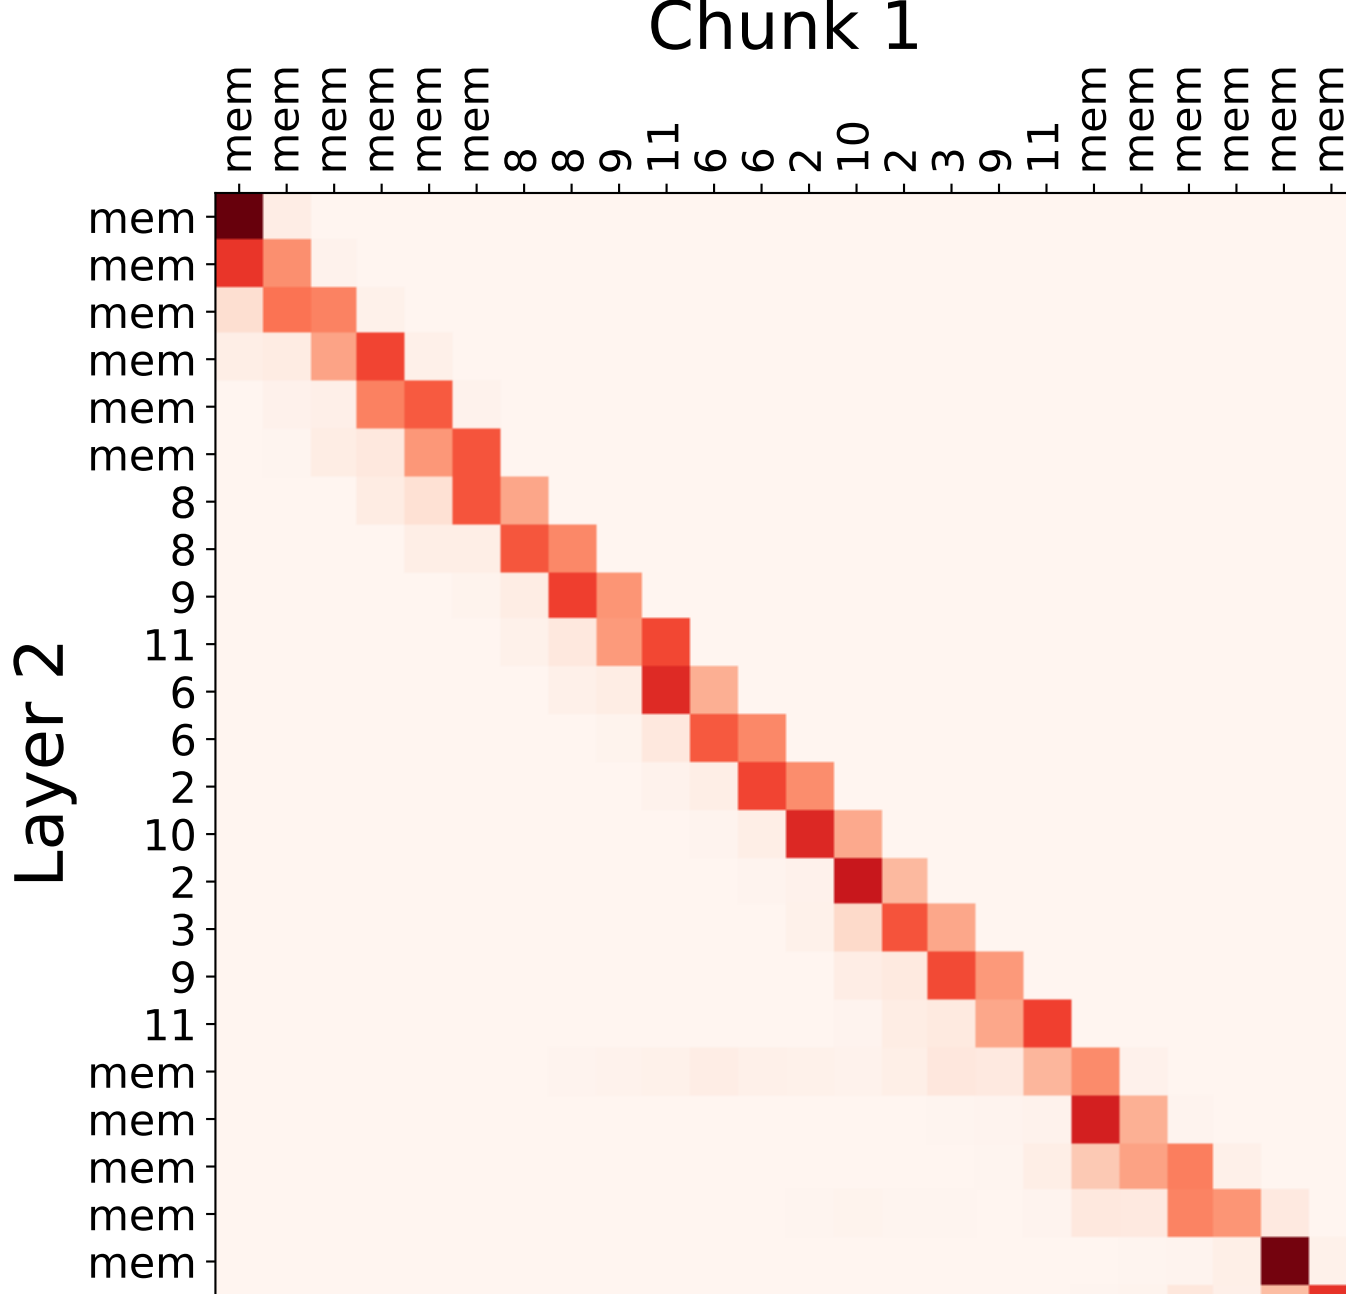

Head 1  
Chunk 1

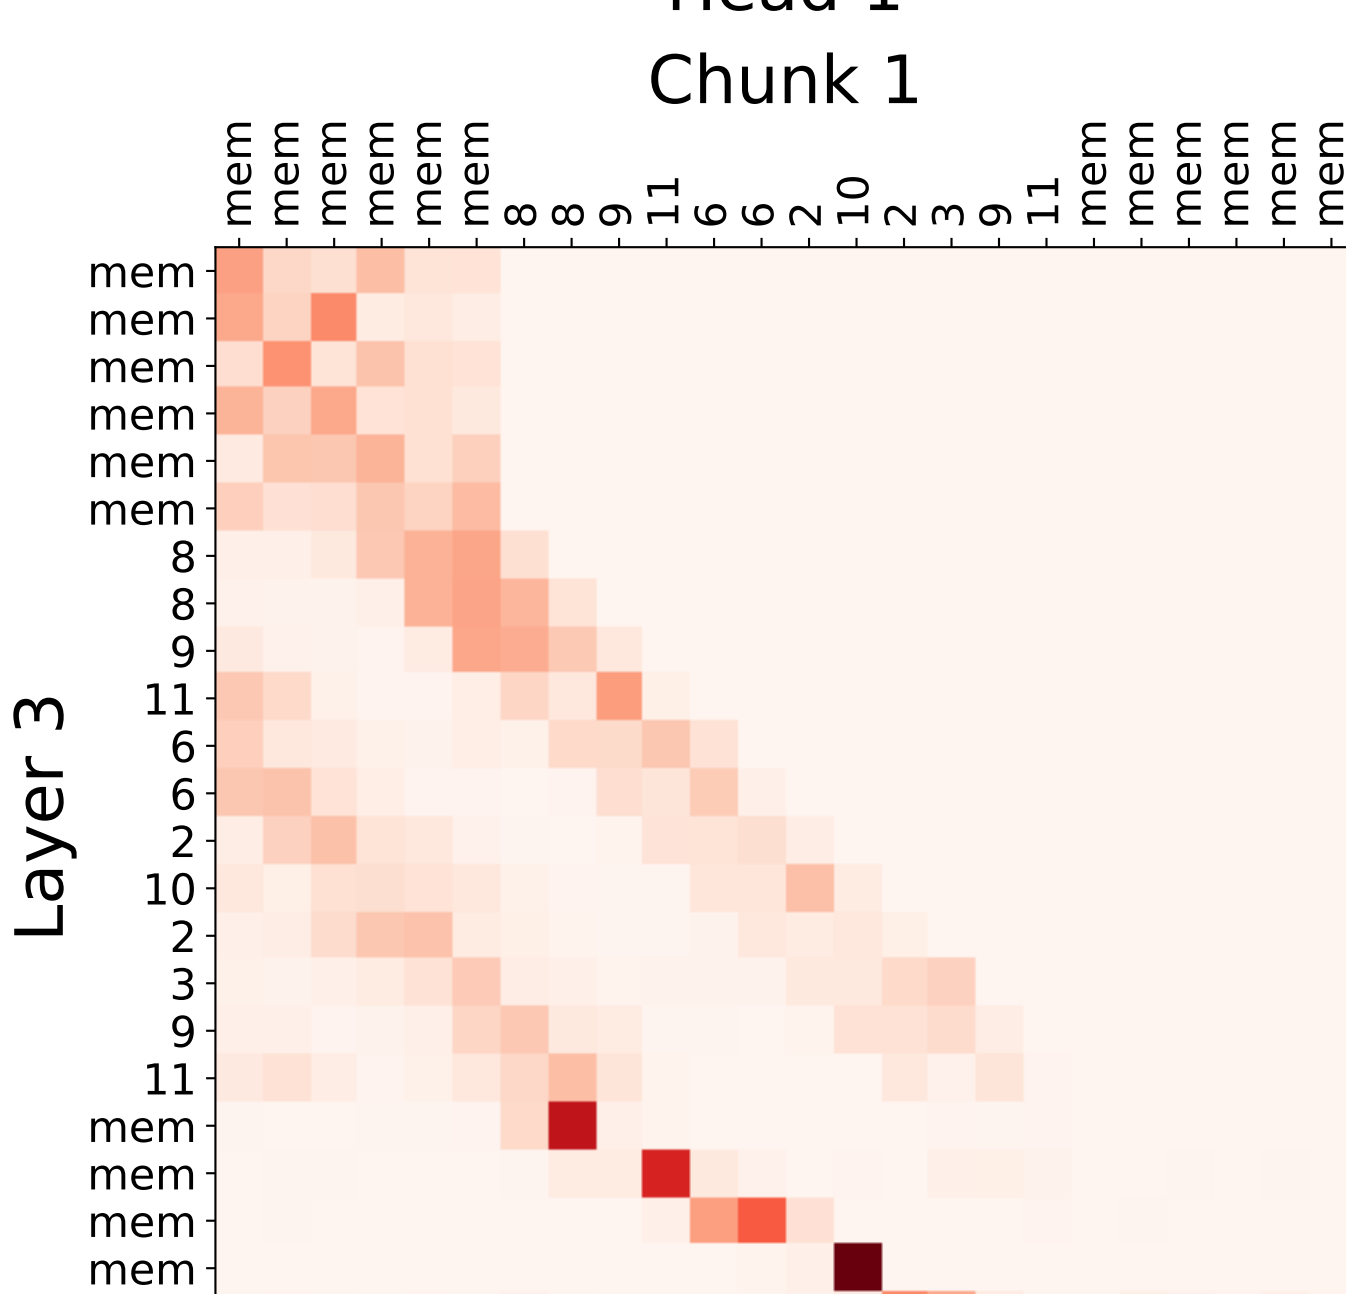

Head 1  
Chunk 1

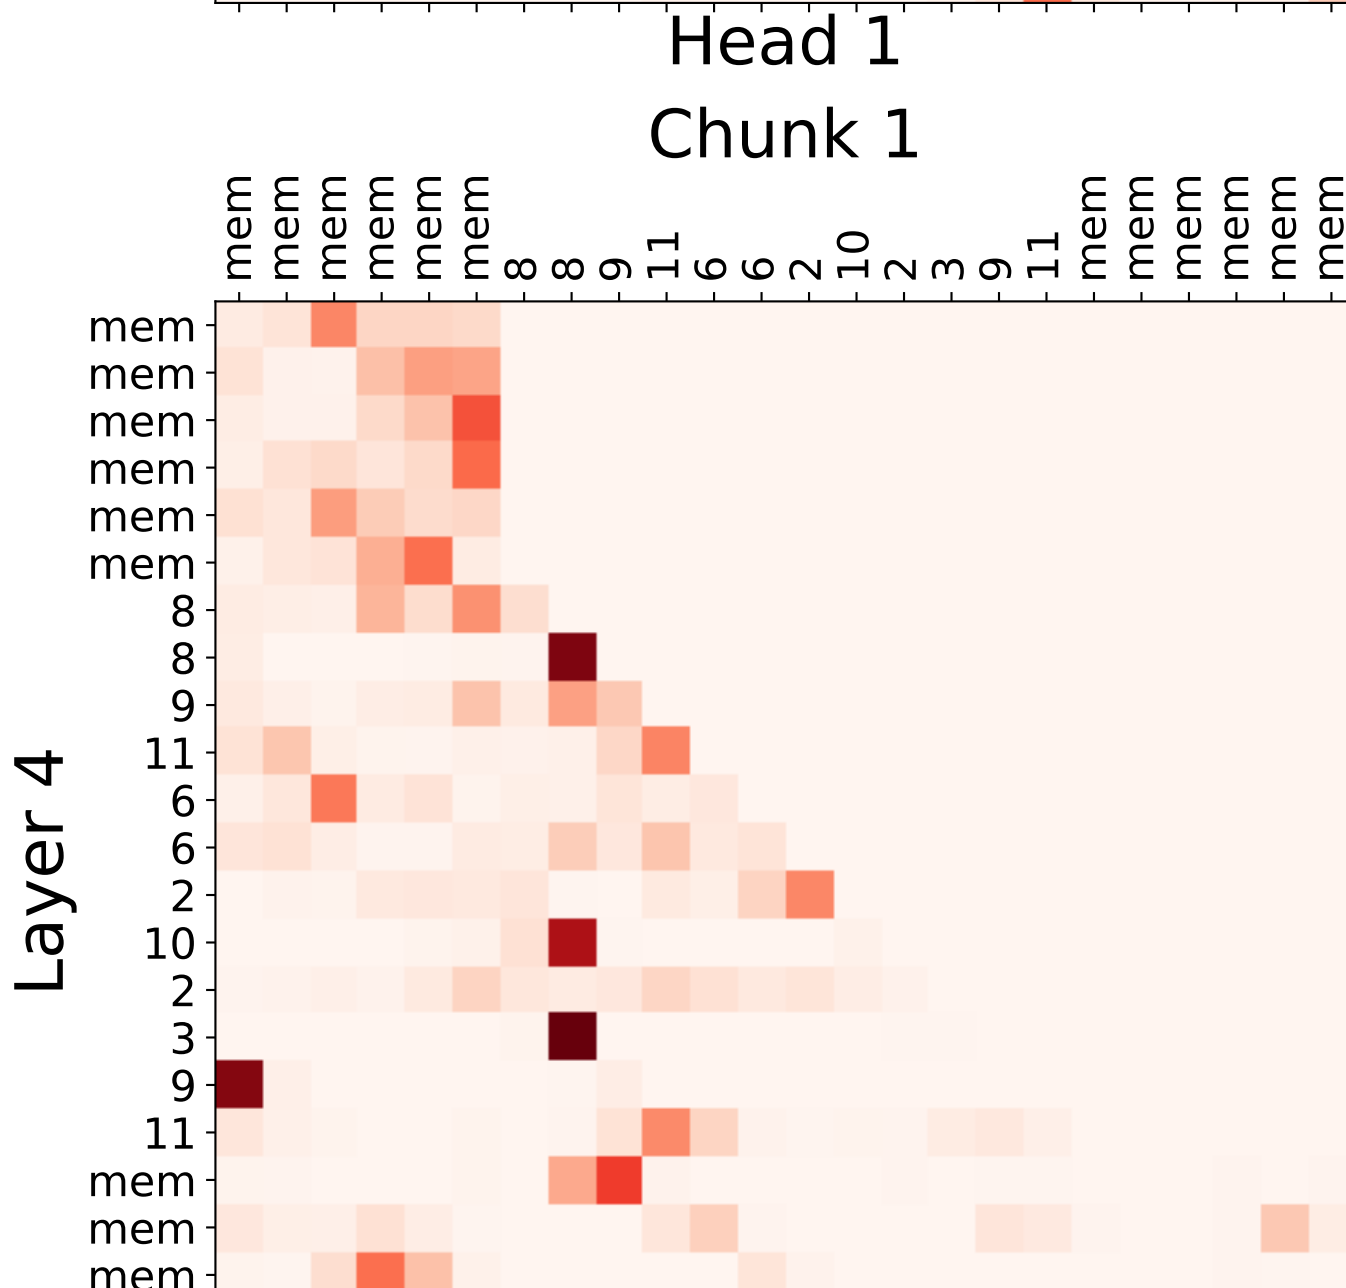

Head 1  
Chunk 2

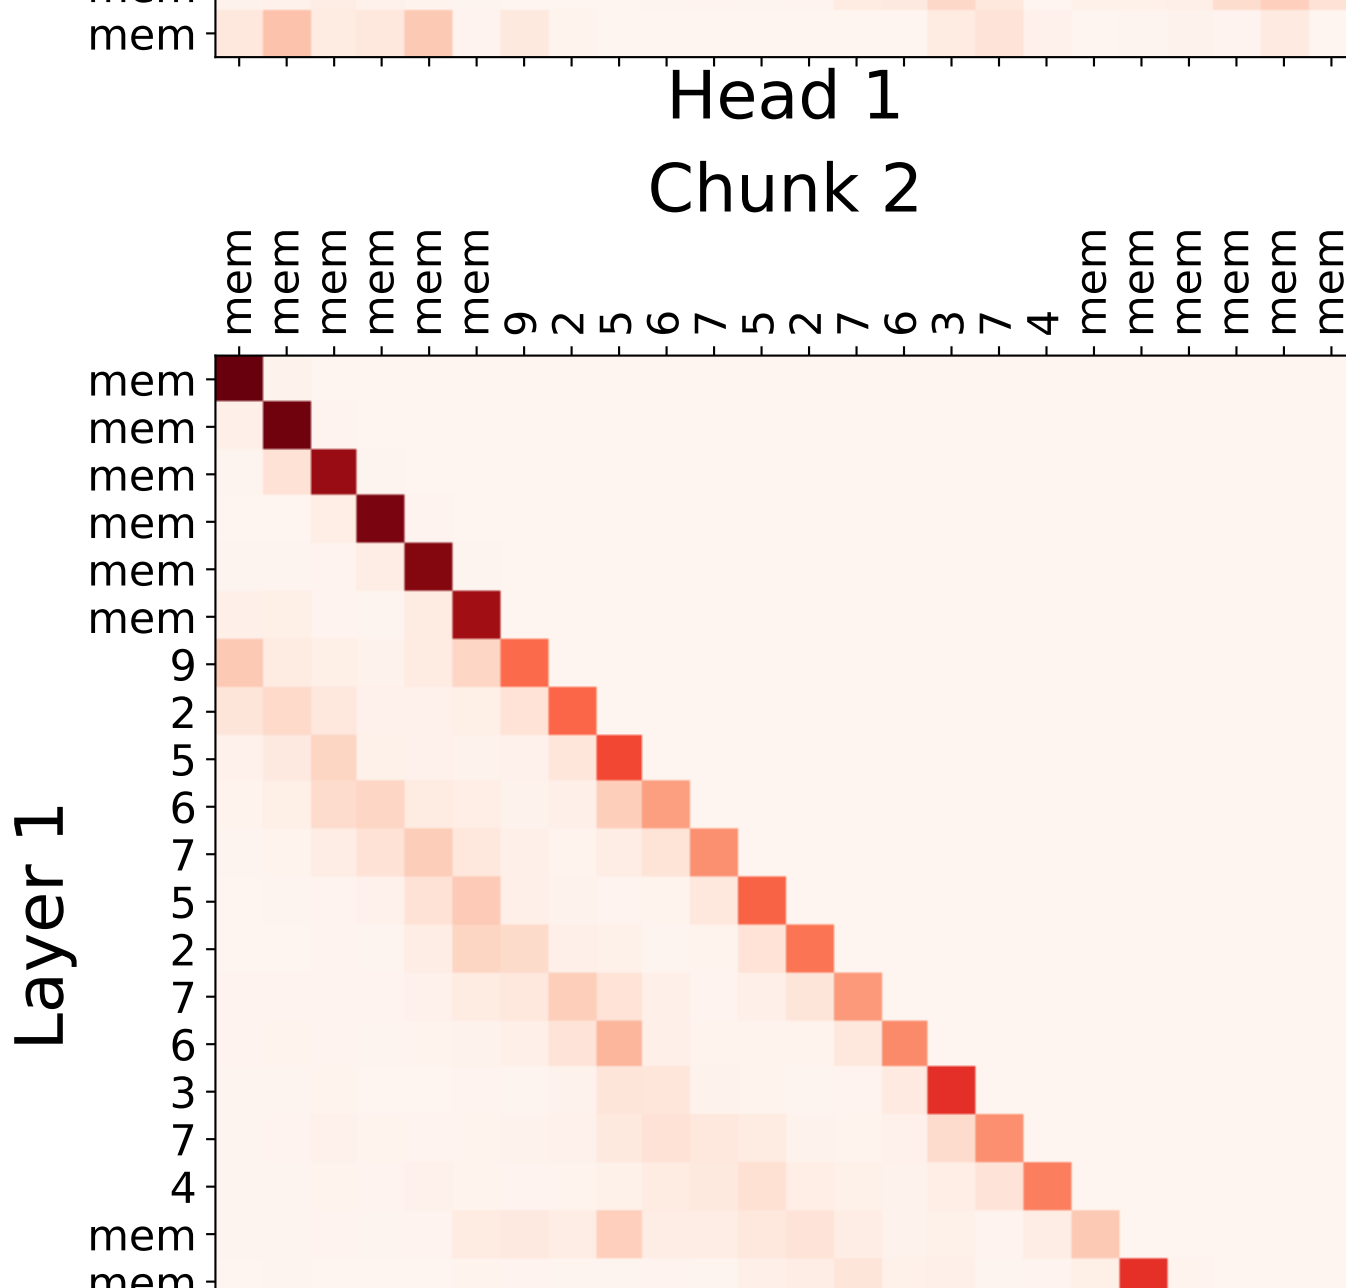

Head 1  
Chunk 2

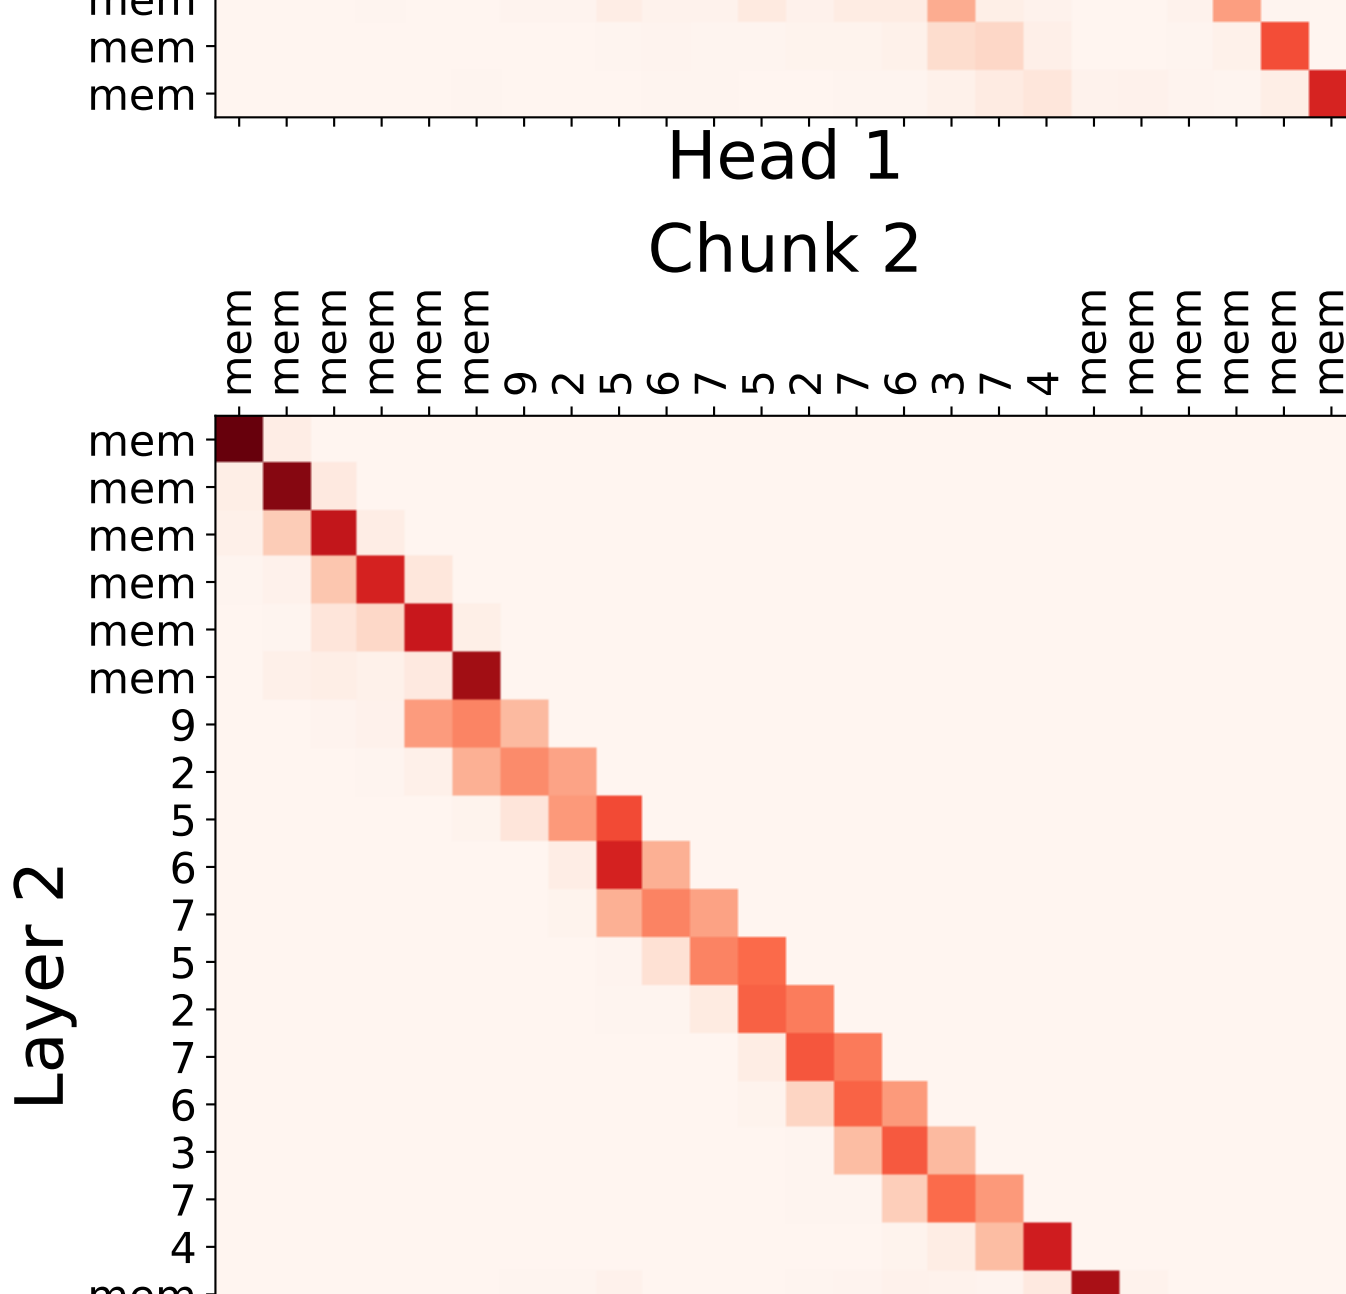

Head 1  
Chunk 2

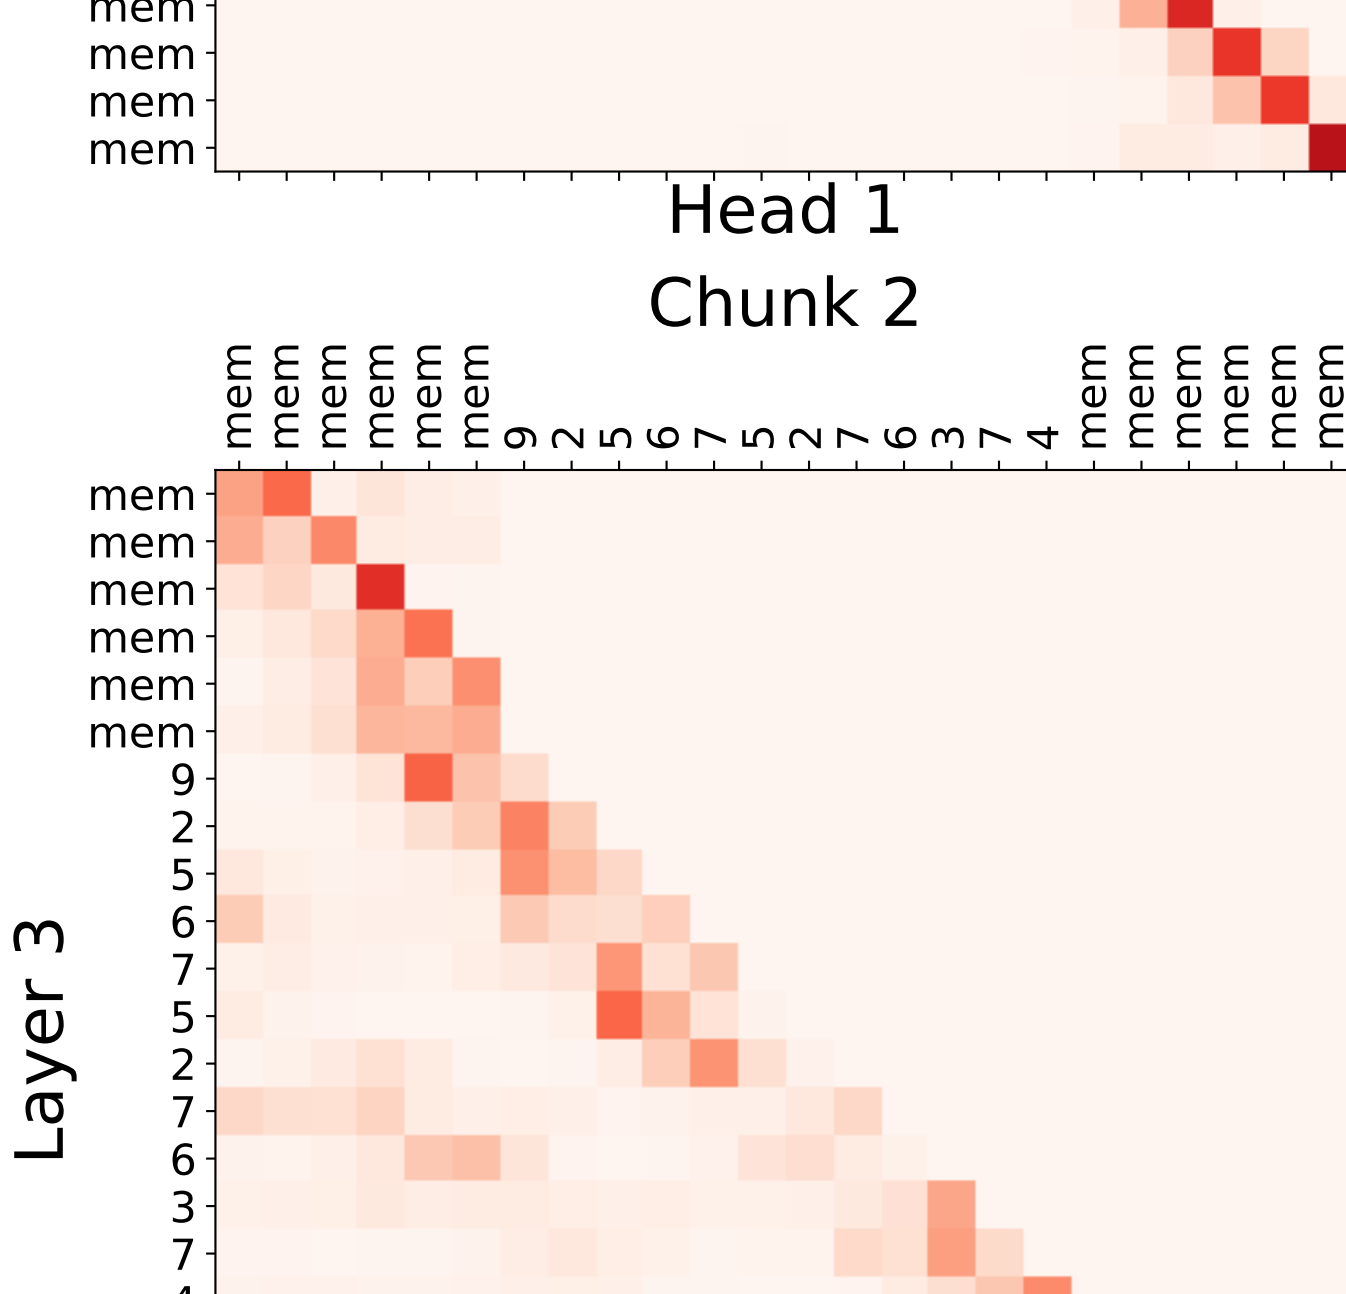

Head 1  
Chunk 2

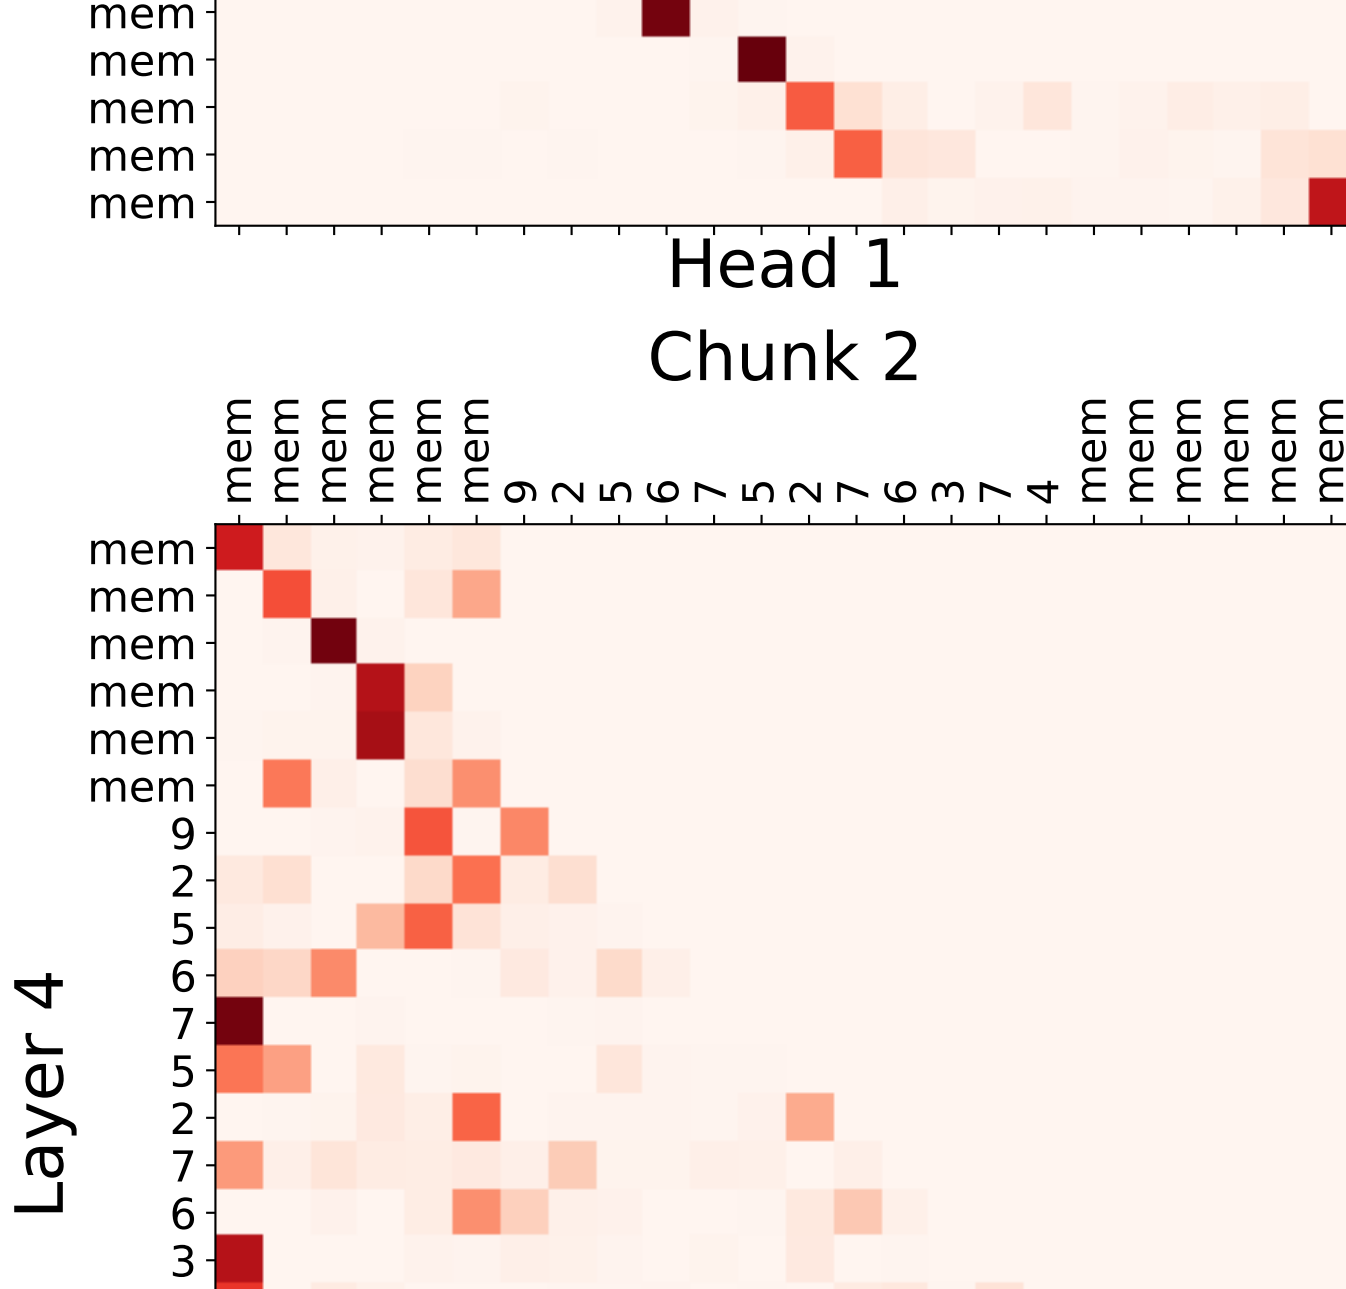

Head 1  
Chunk 3

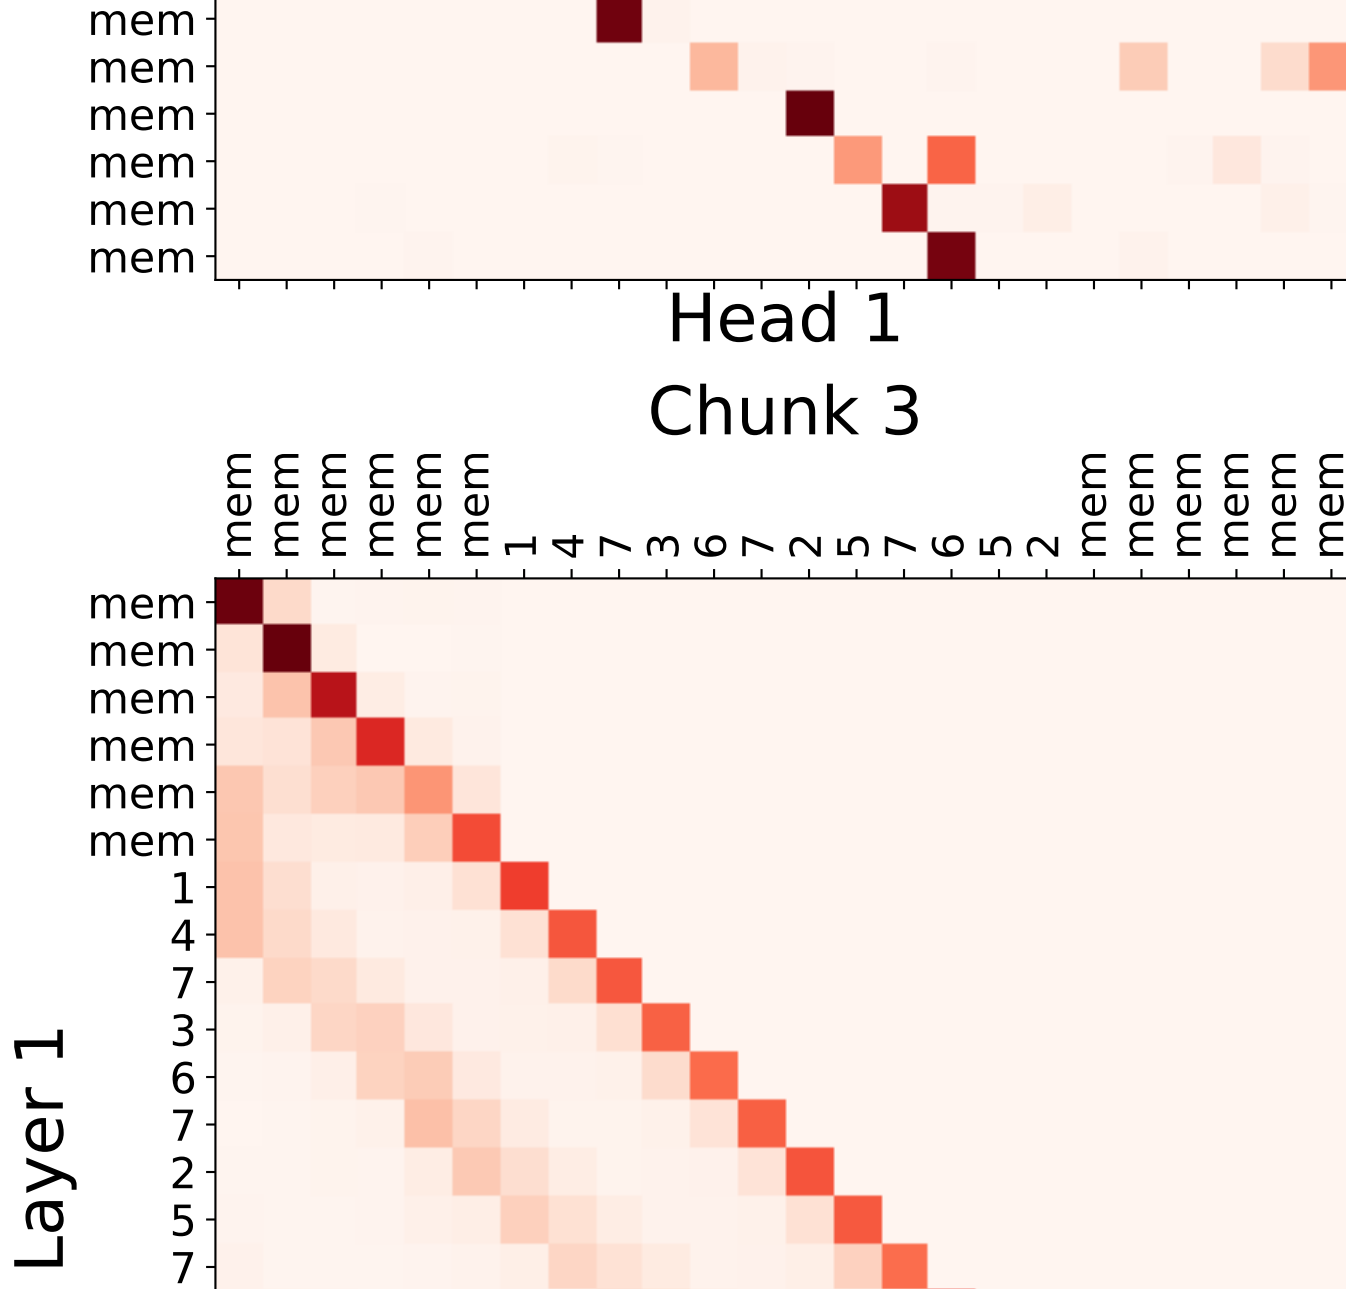

Head 1  
Chunk 3

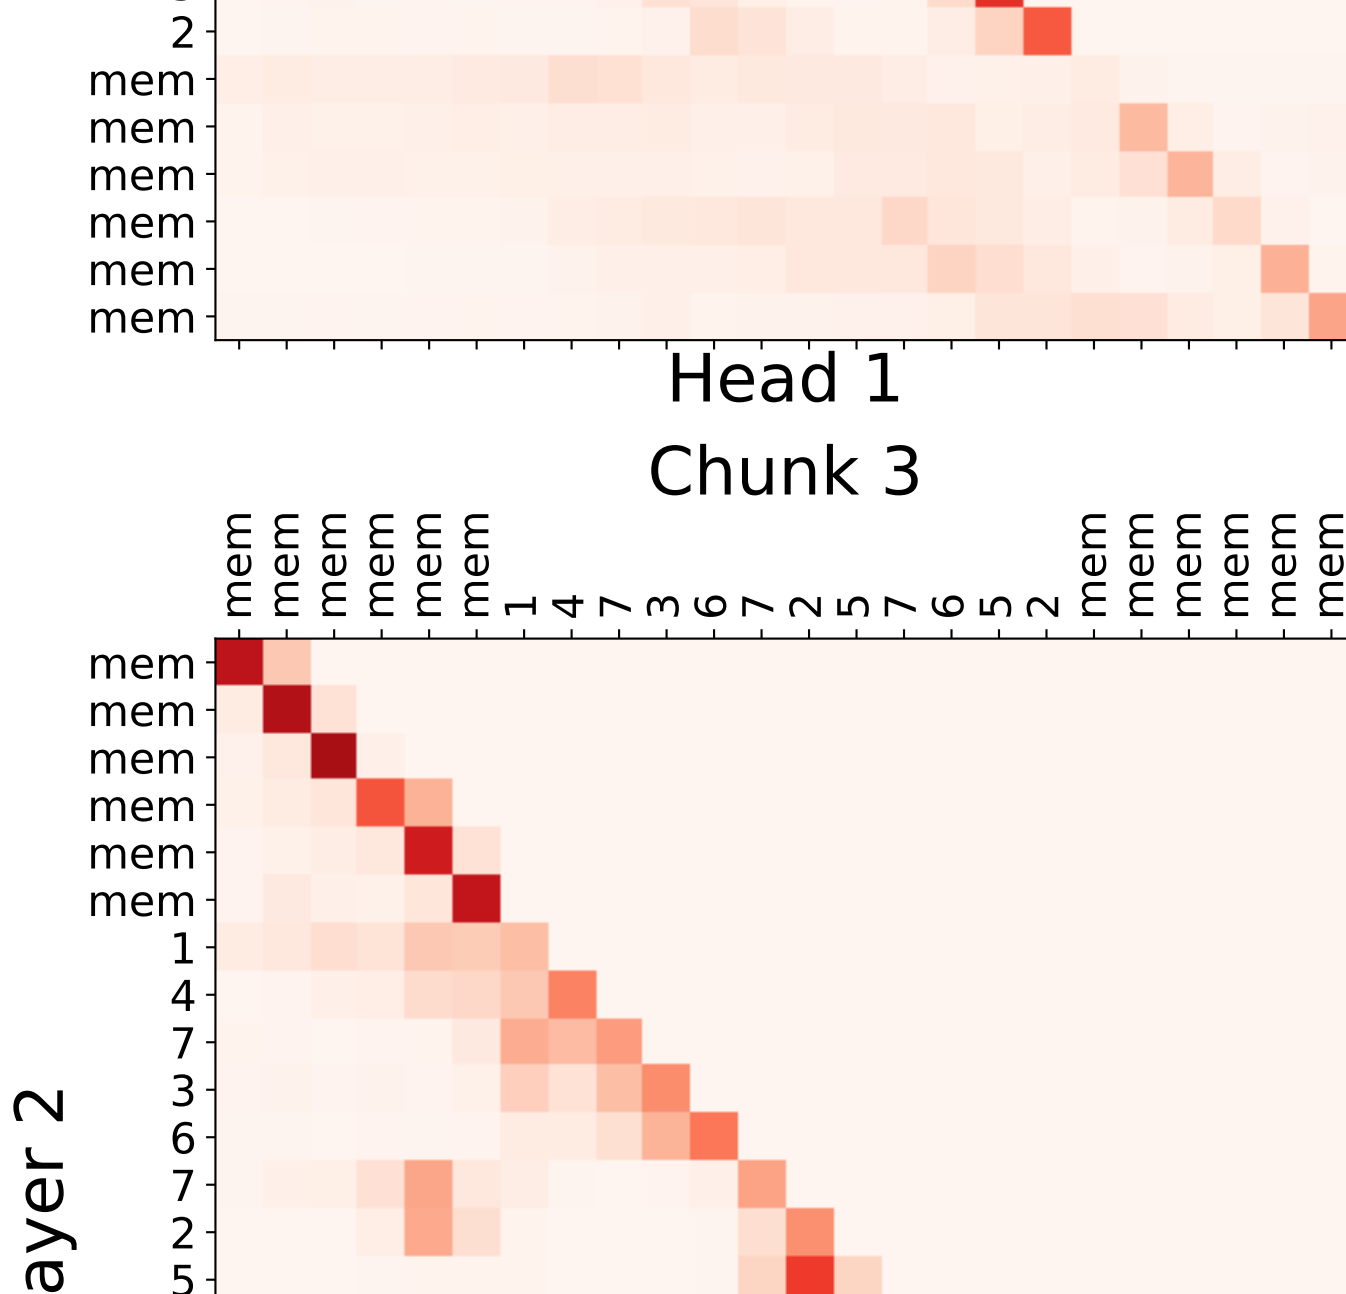

Head 1  
Chunk 3

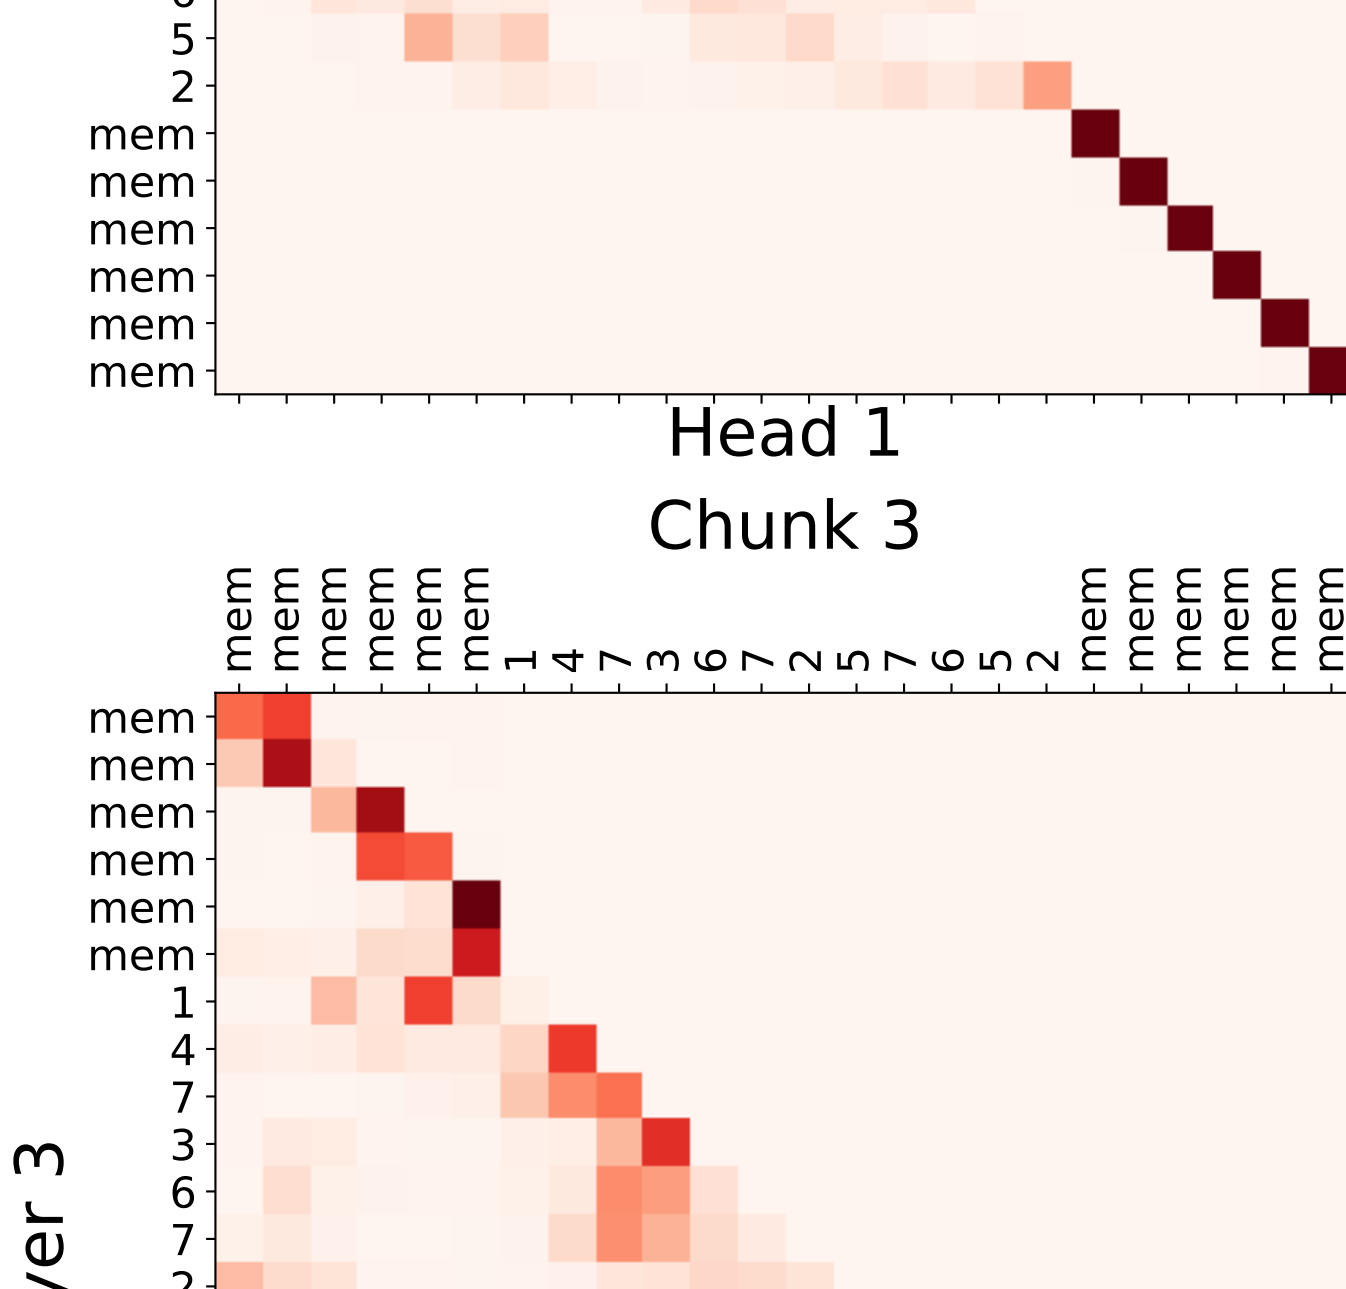

Head 1  
Chunk 3

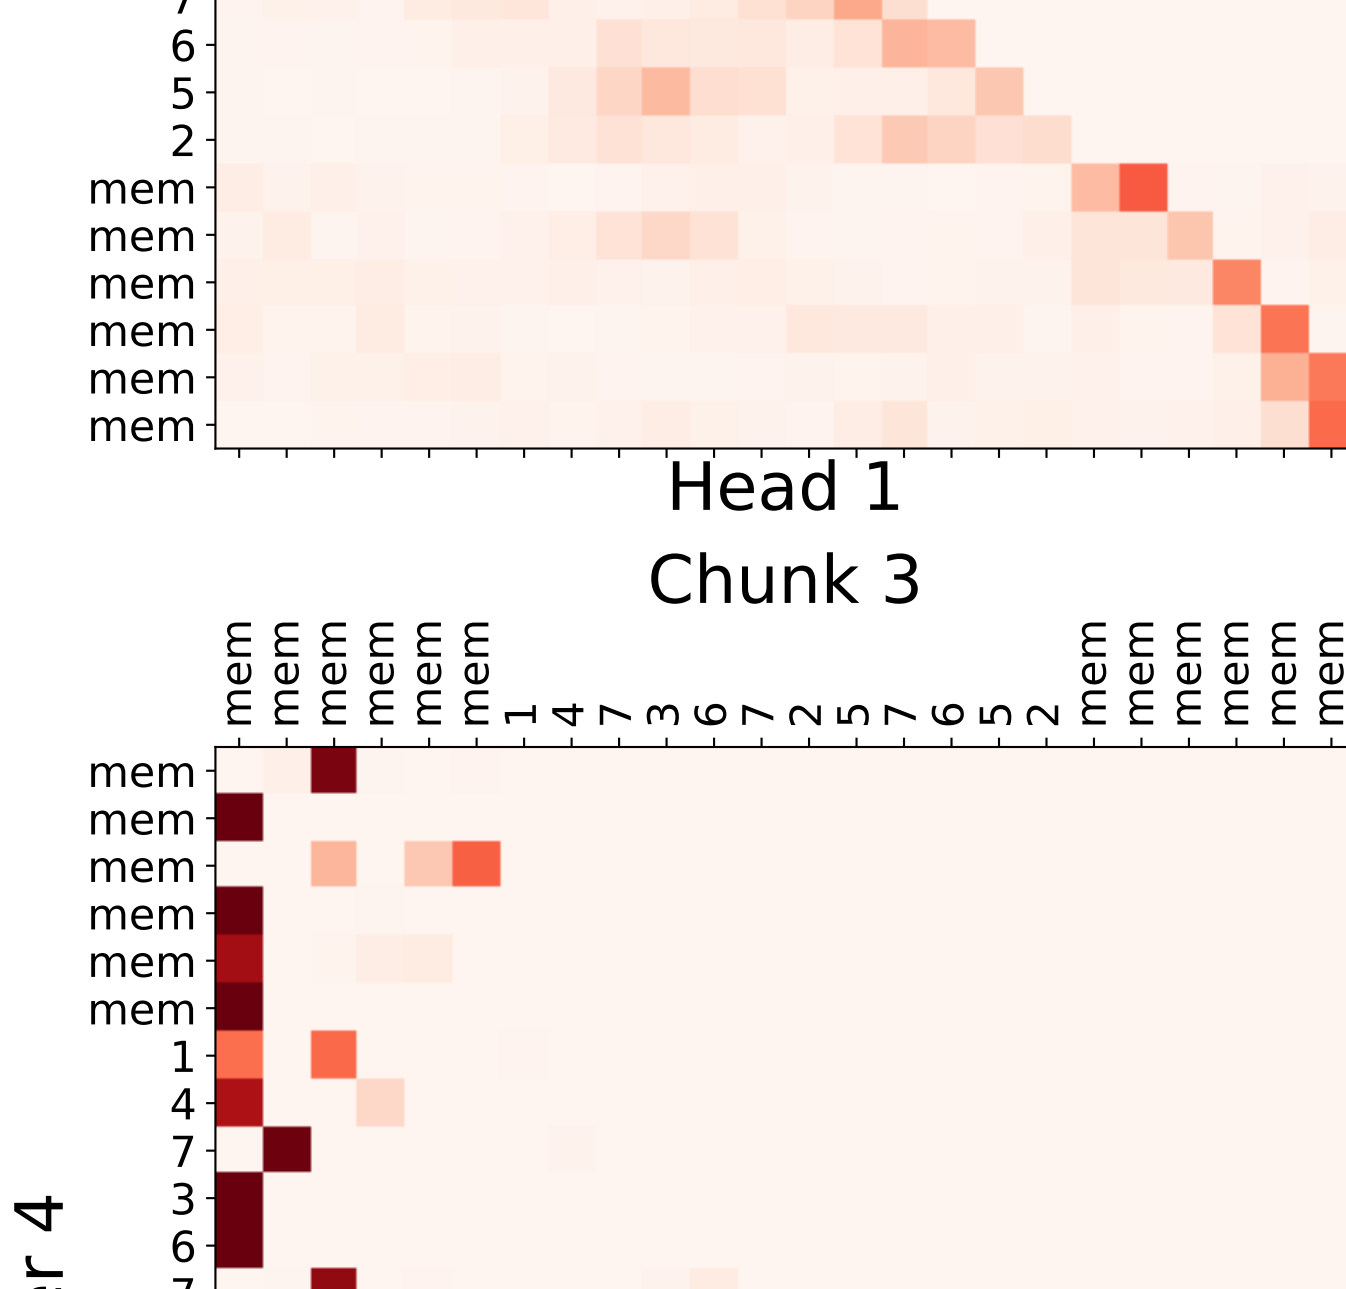

Head 1  
Chunk 4

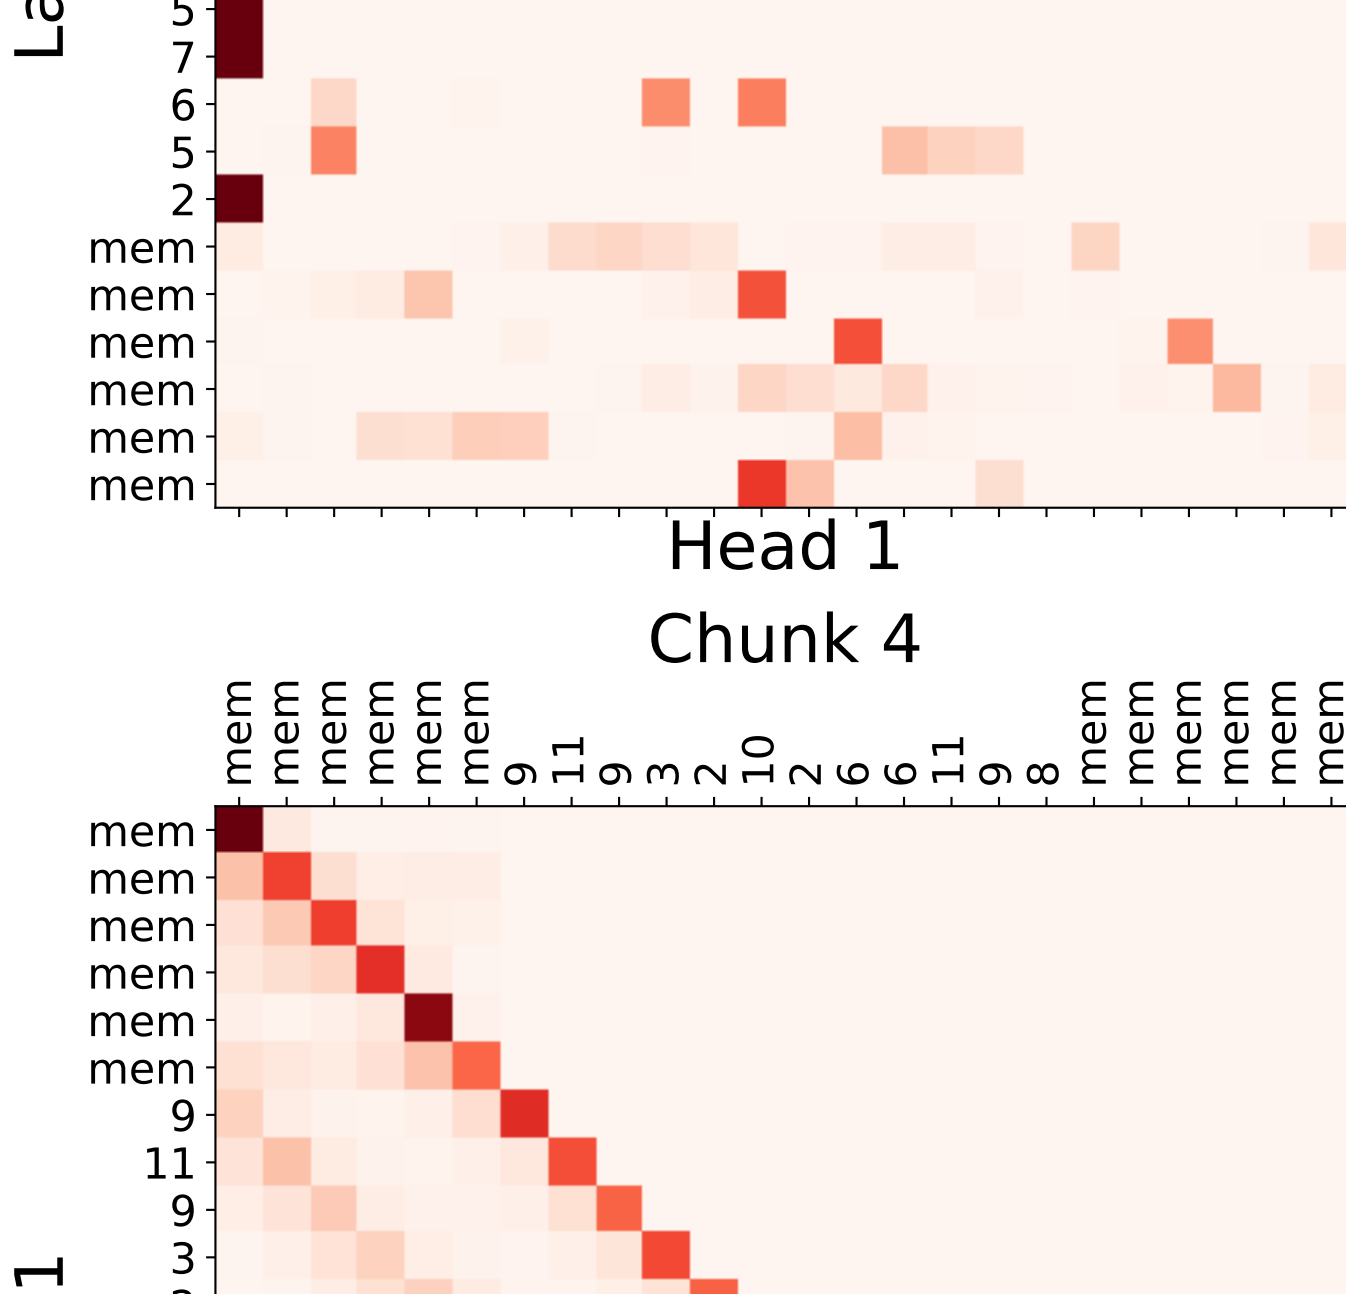

Head 1  
Chunk 4

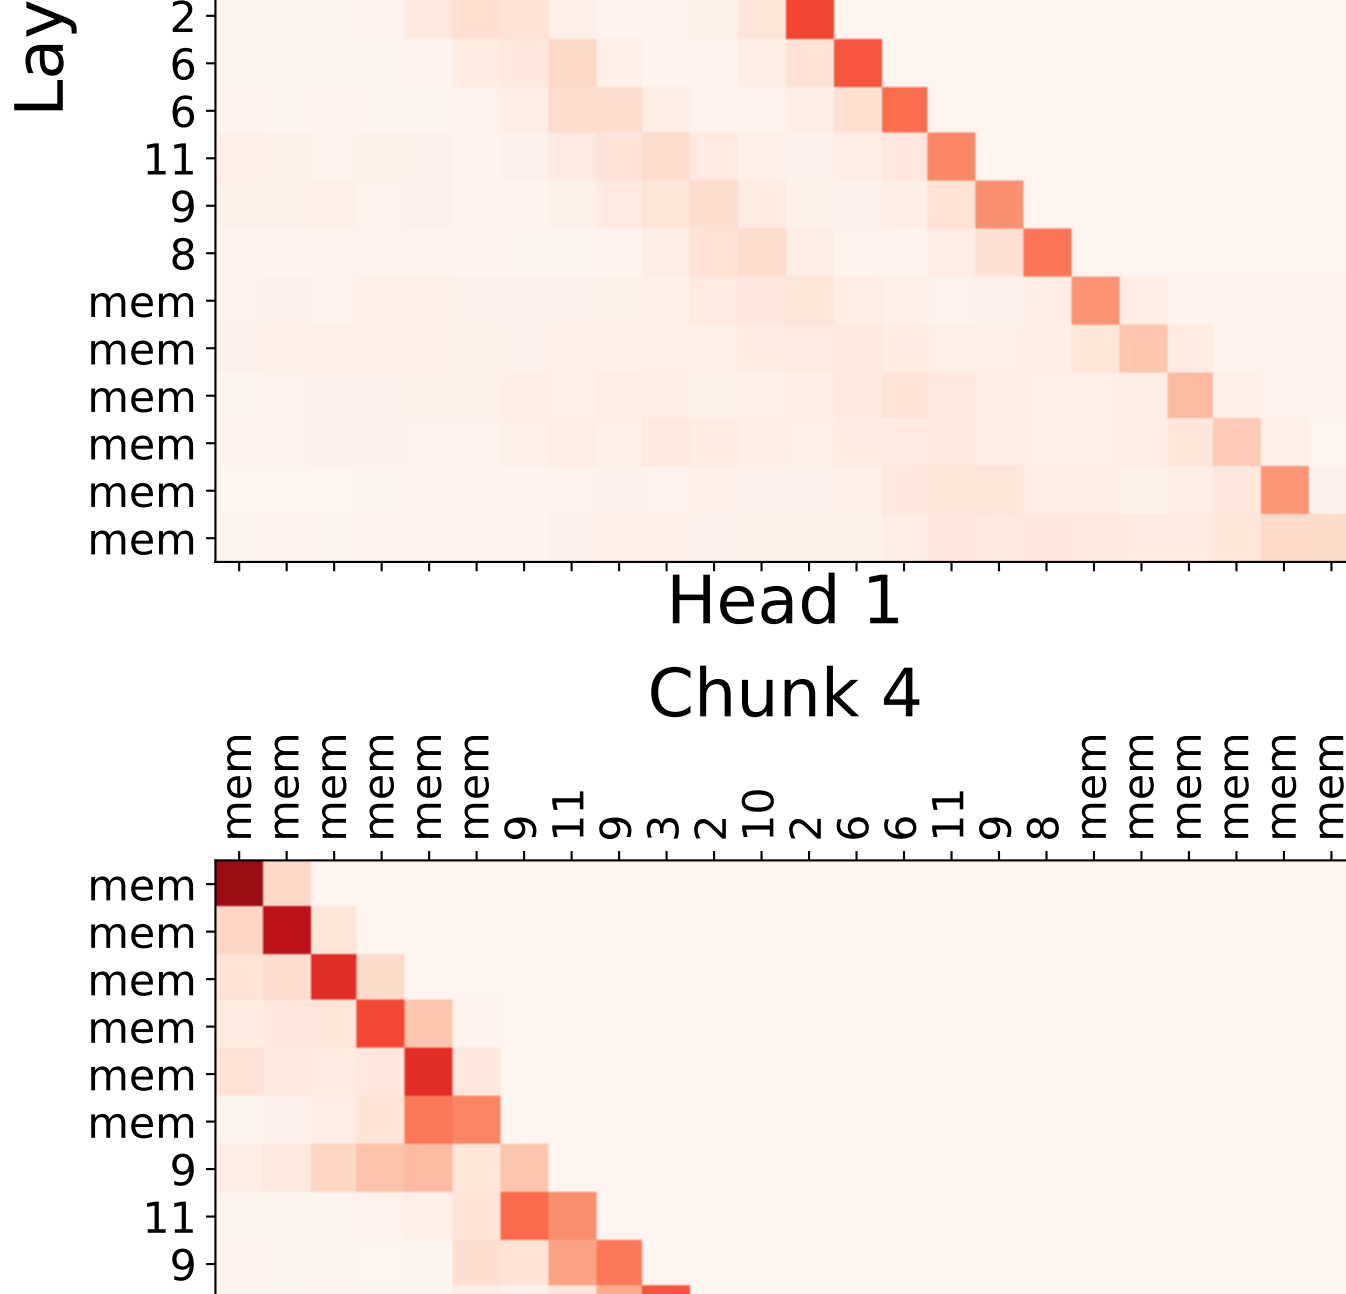

Head 1  
Chunk 4

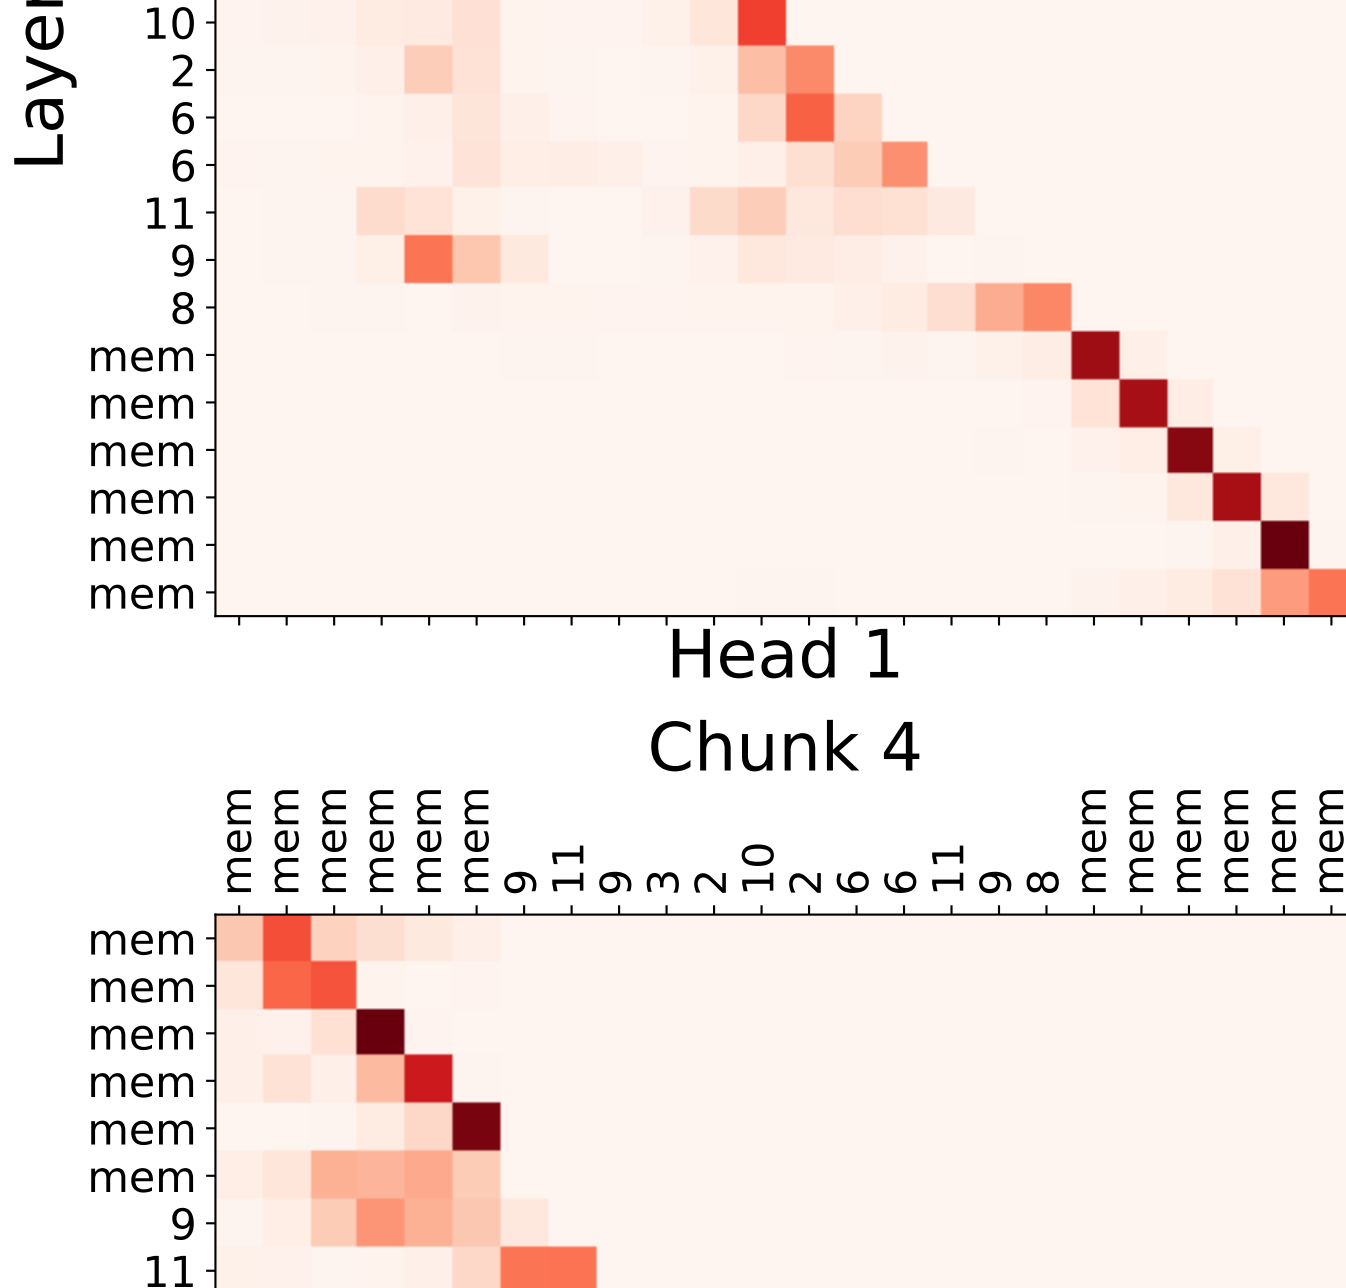

Head 1

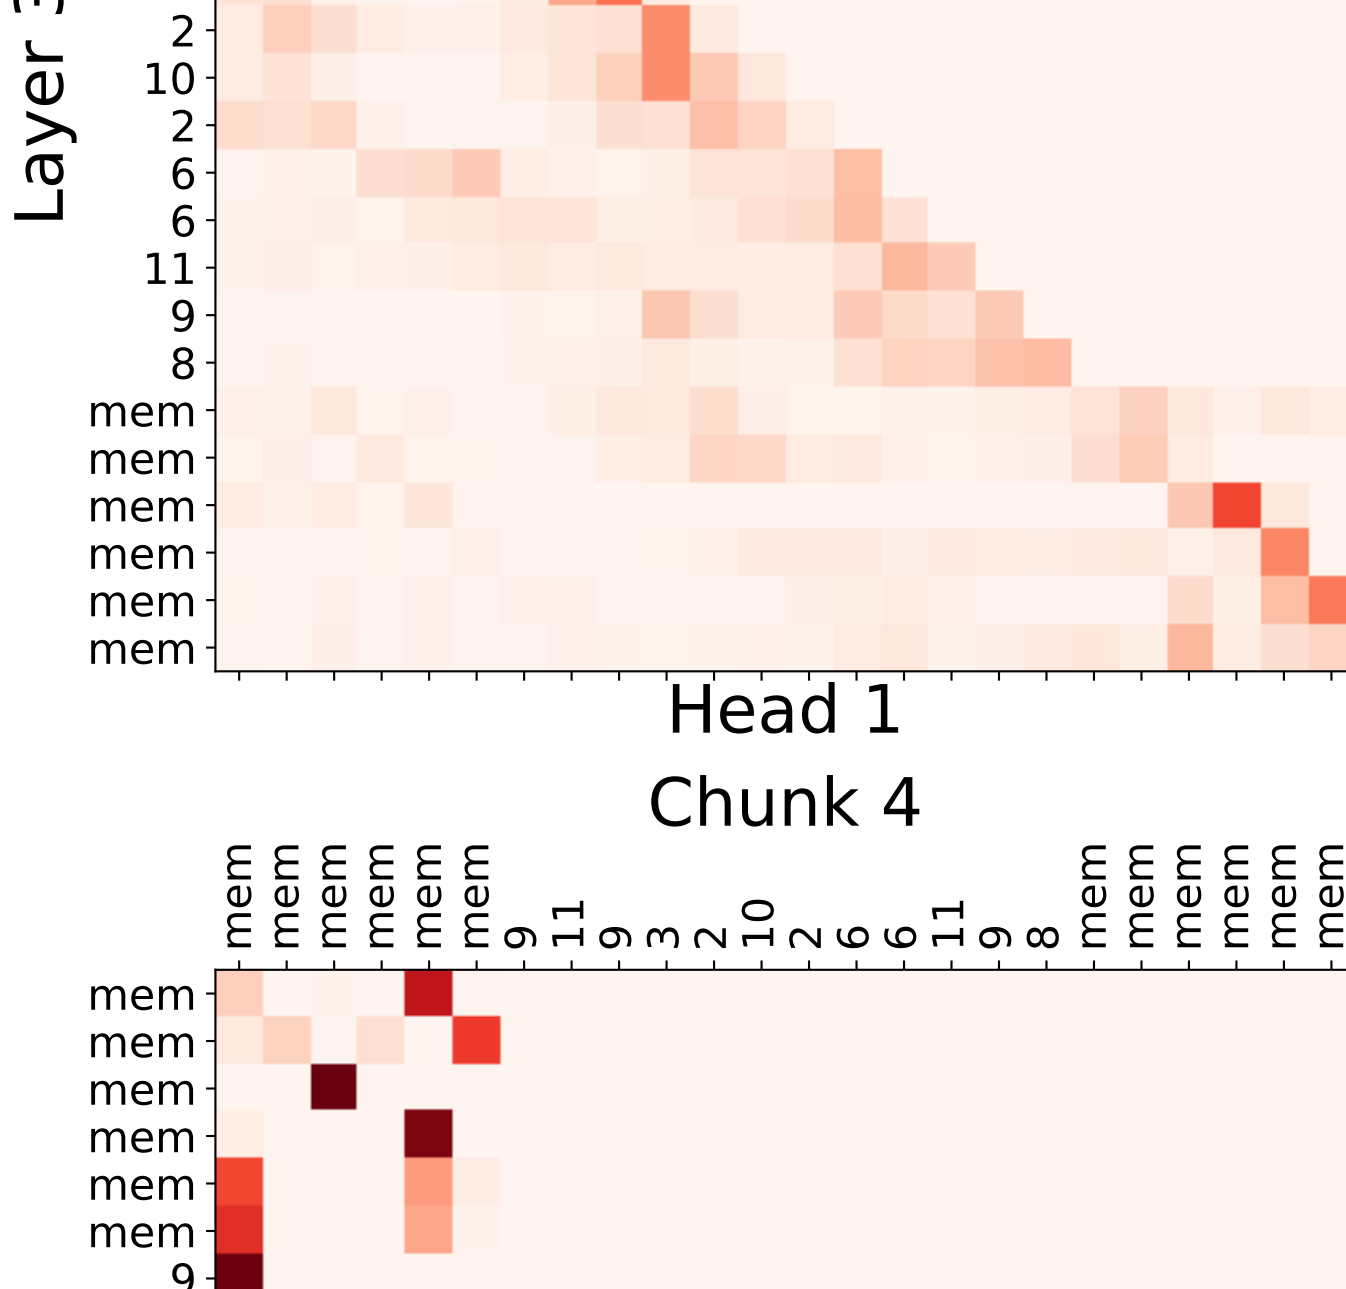

Head 2

Chunk 1

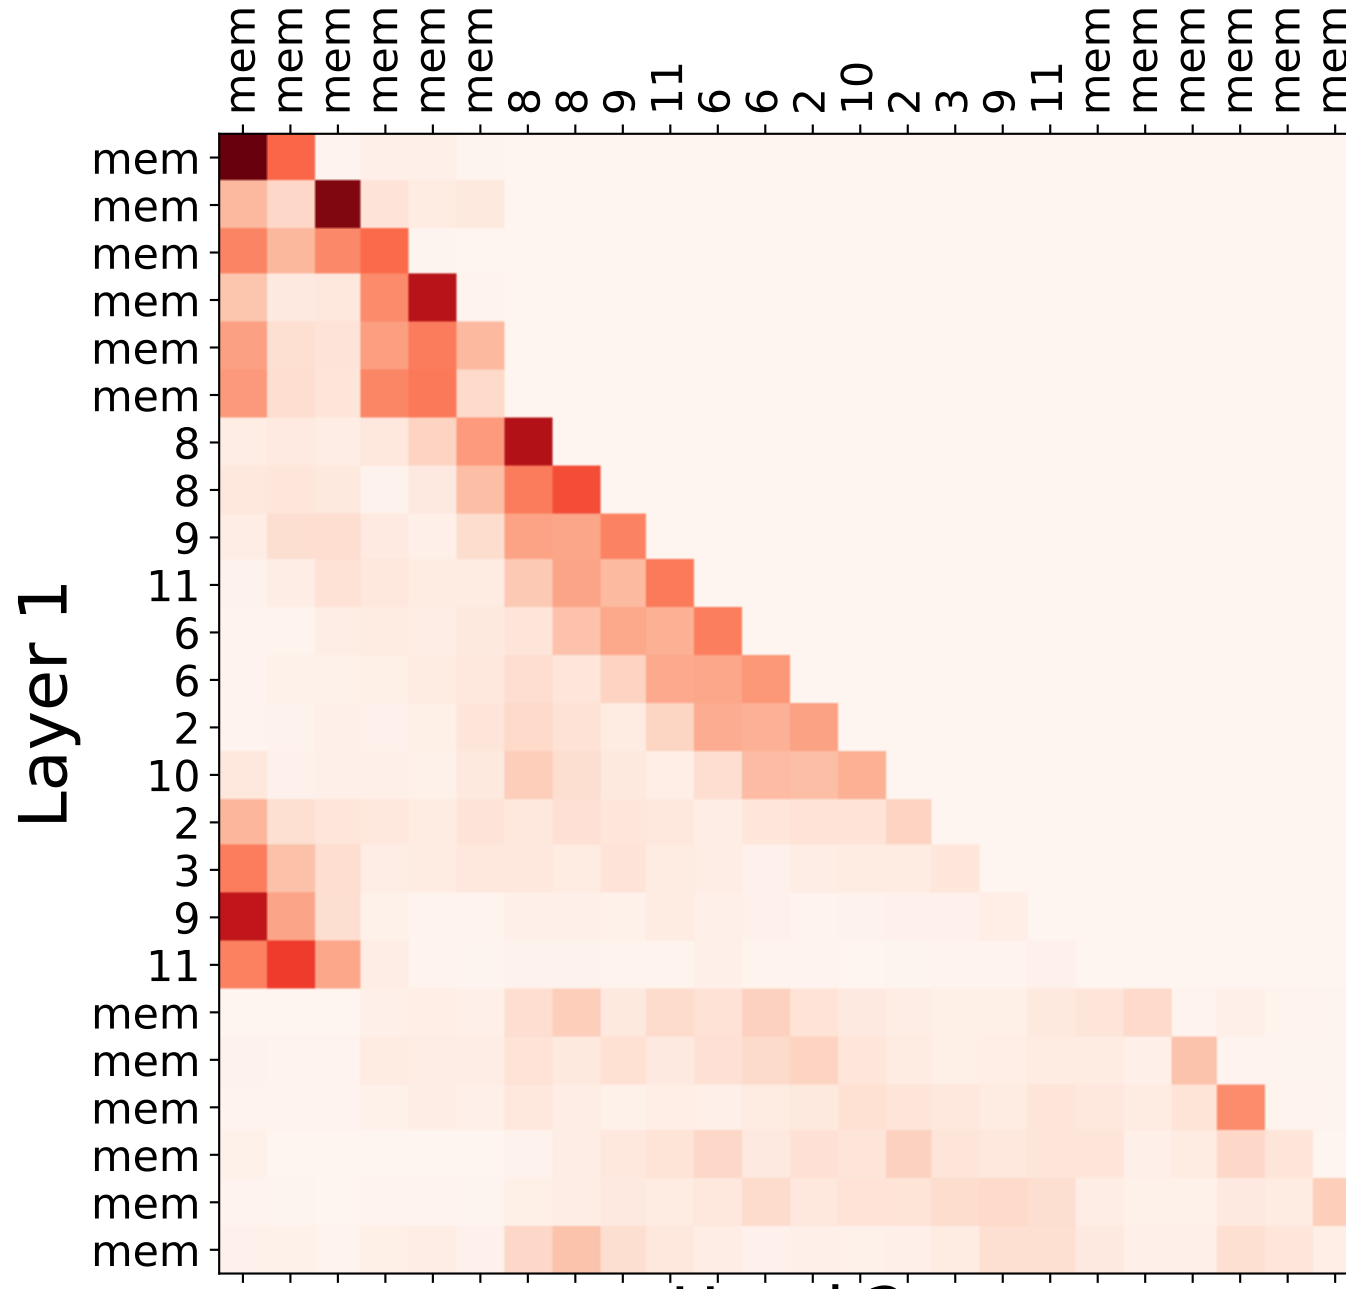

Head 2  
Chunk 1

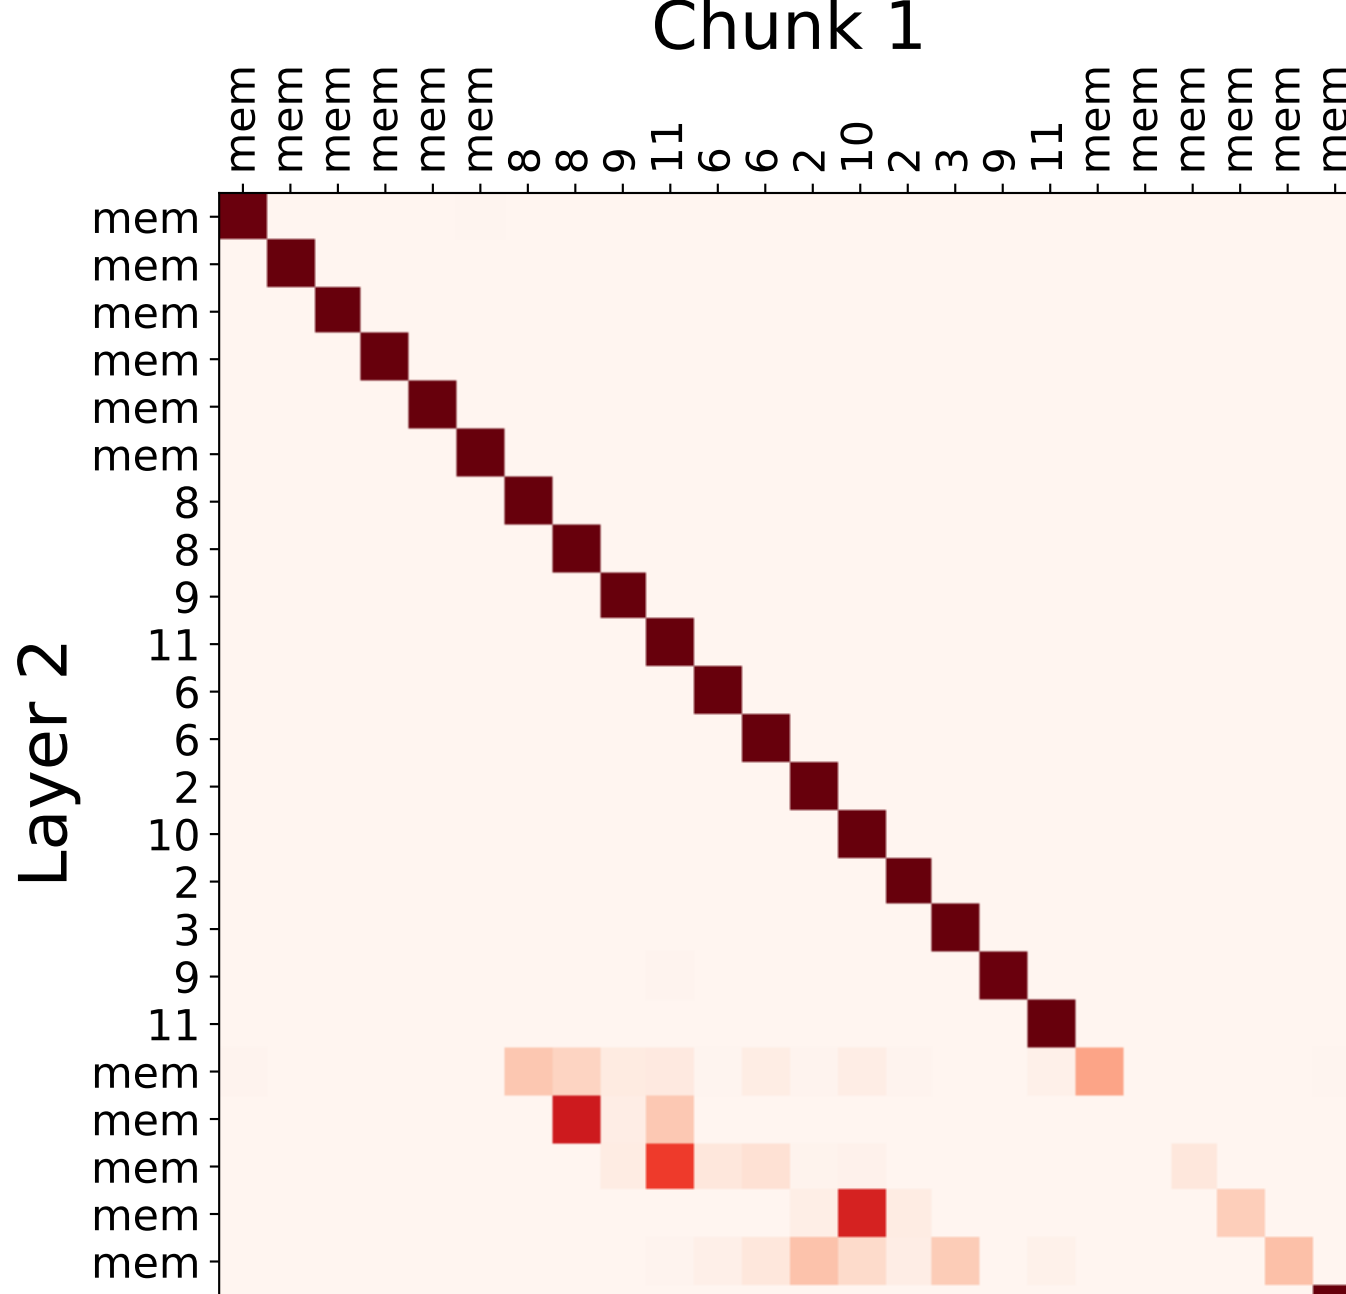

Head 2  
Chunk 1

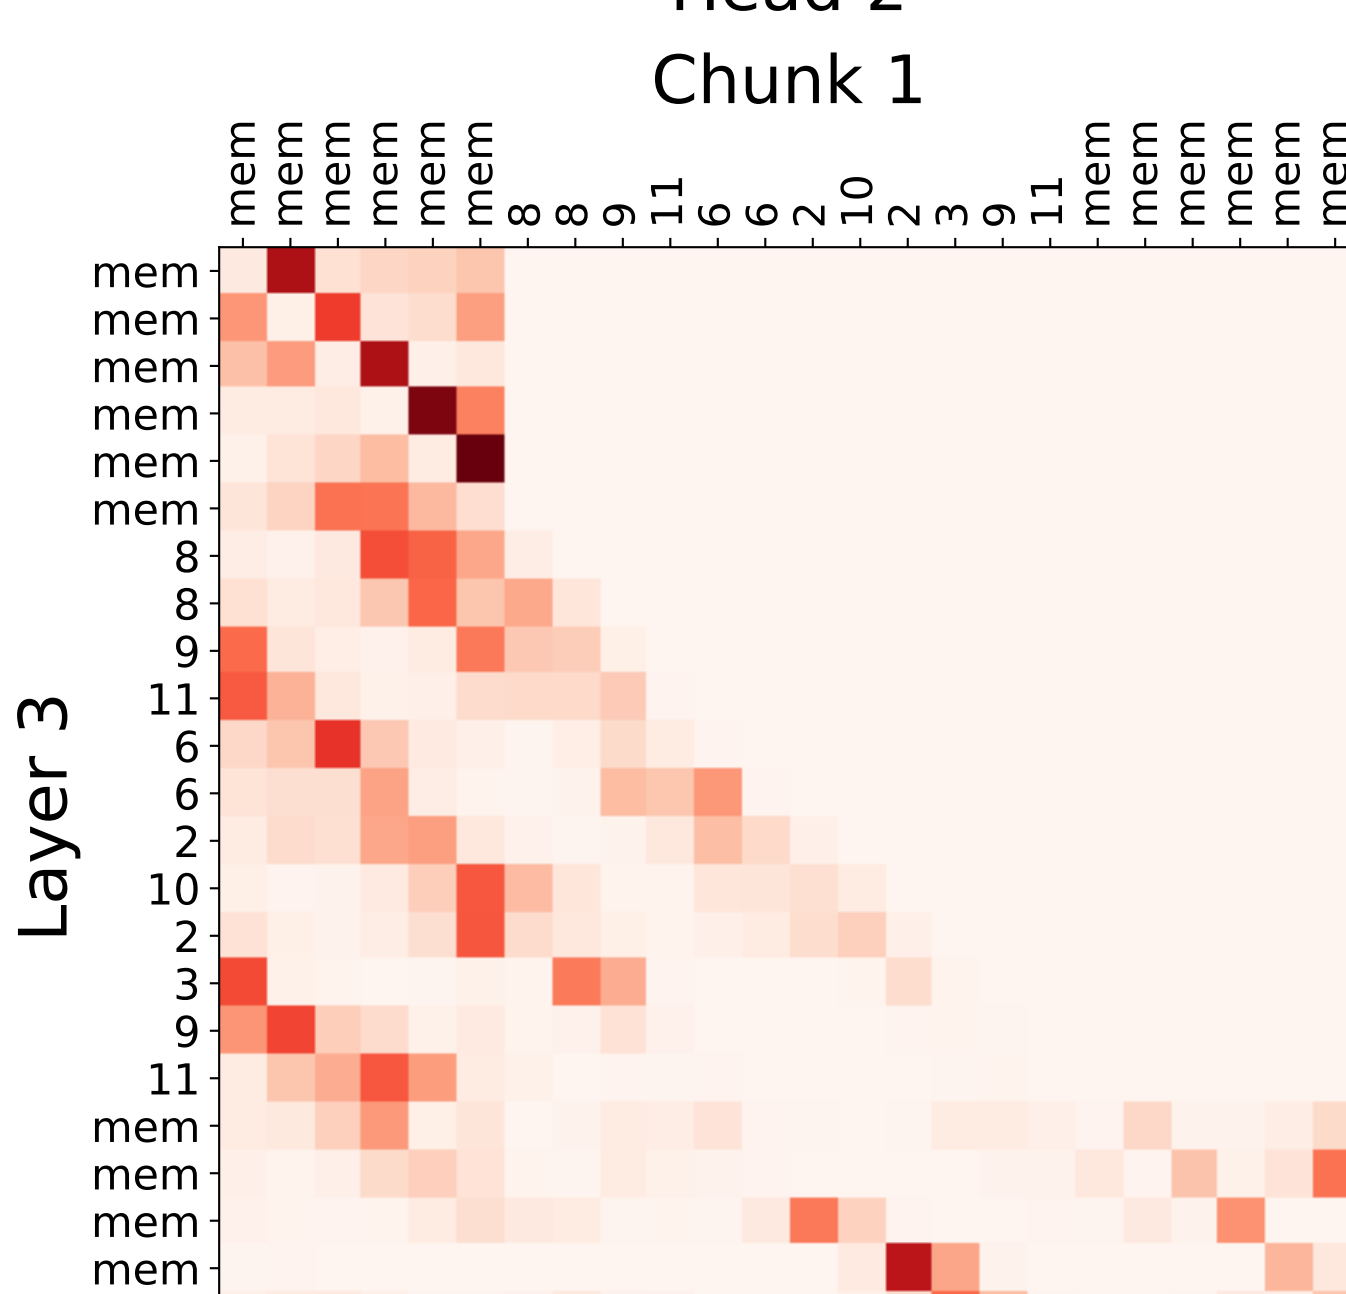

Head 2  
Chunk 1

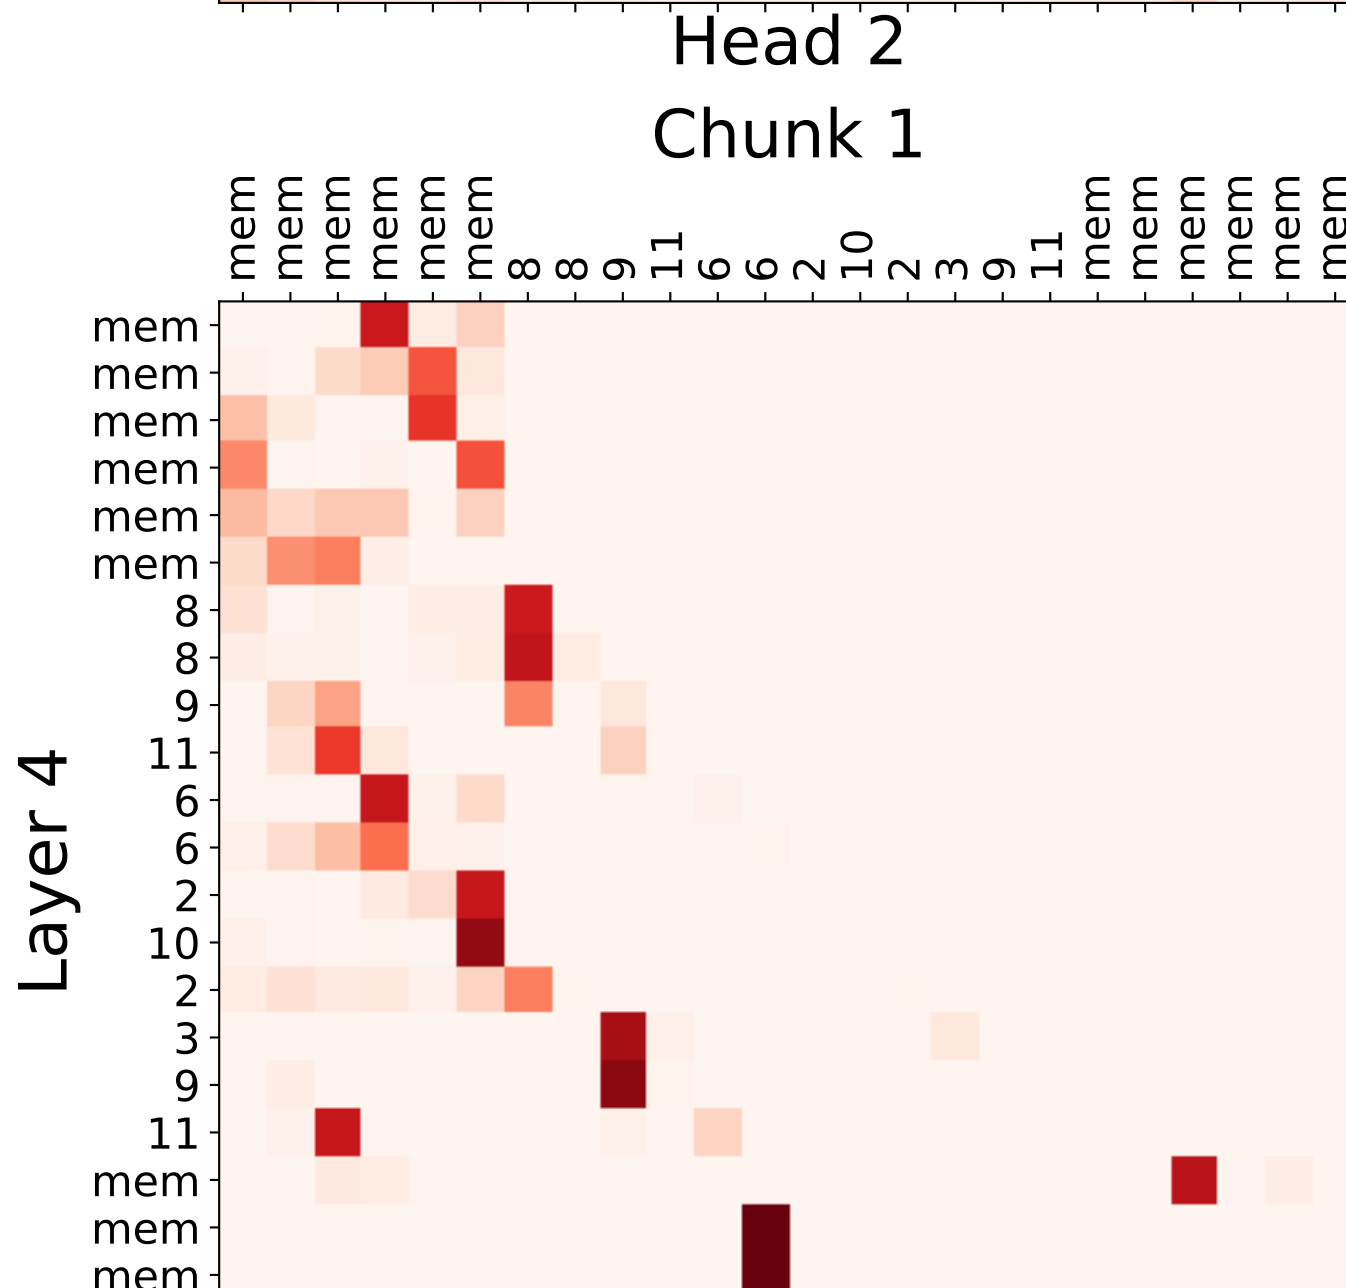

Head 2  
Chunk 2

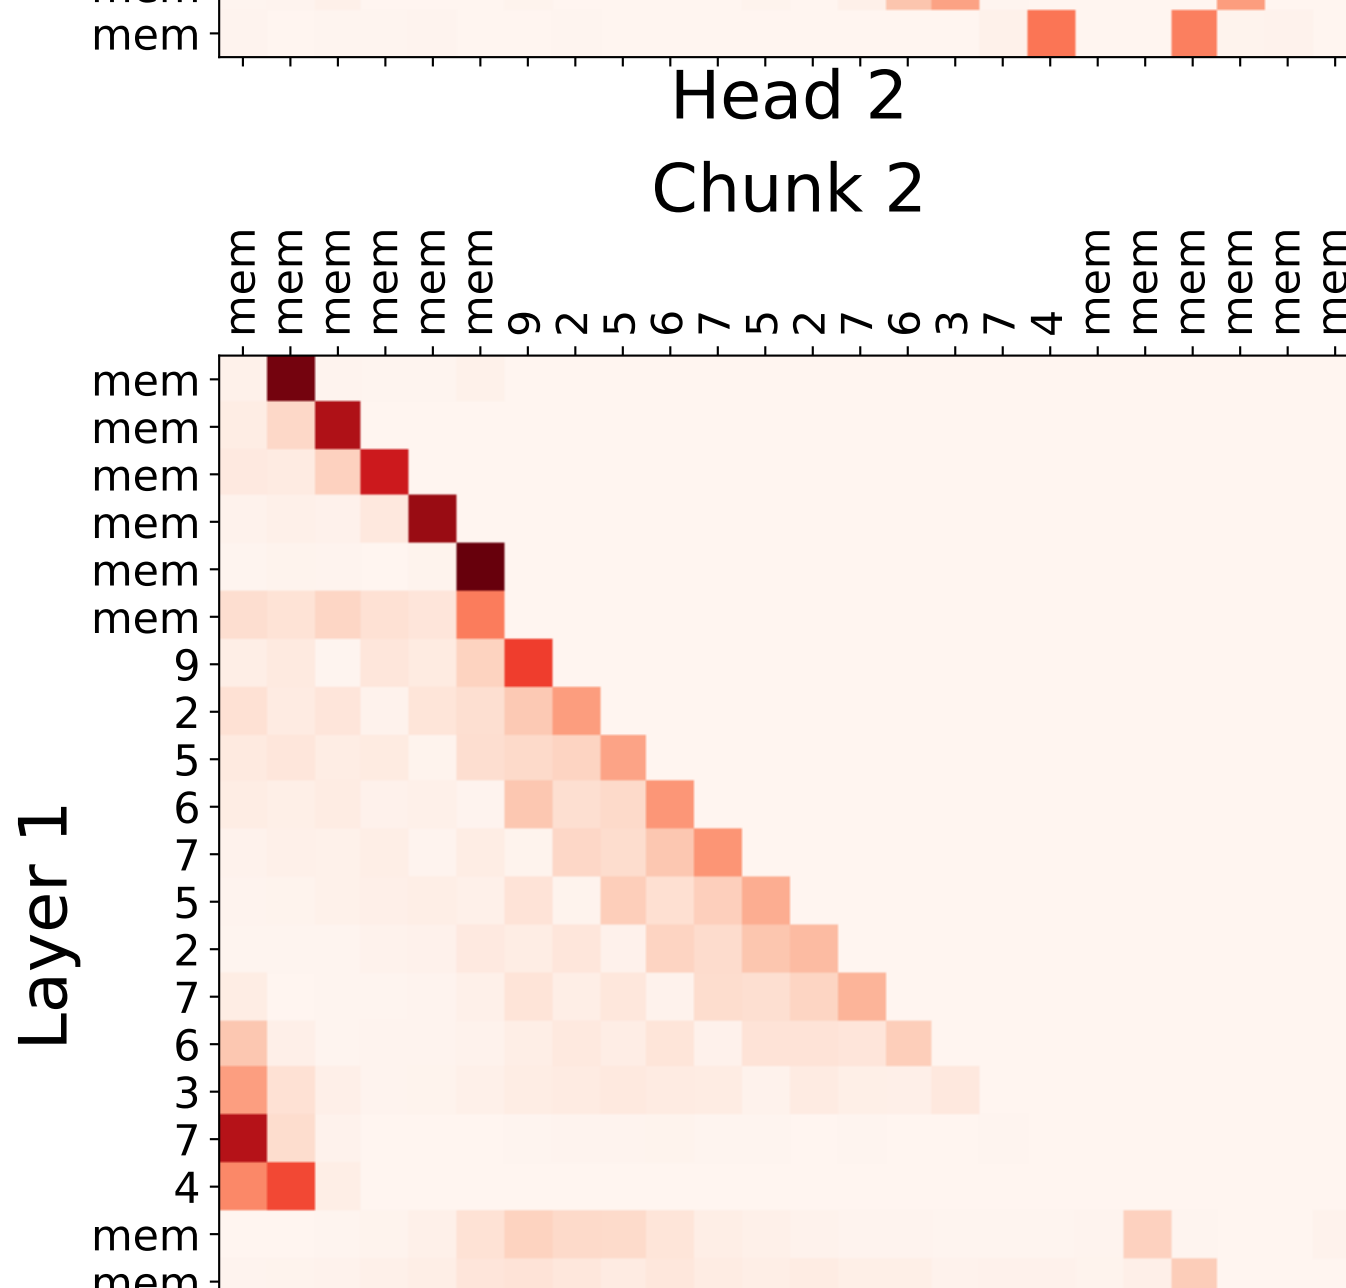

Head 2  
Chunk 2

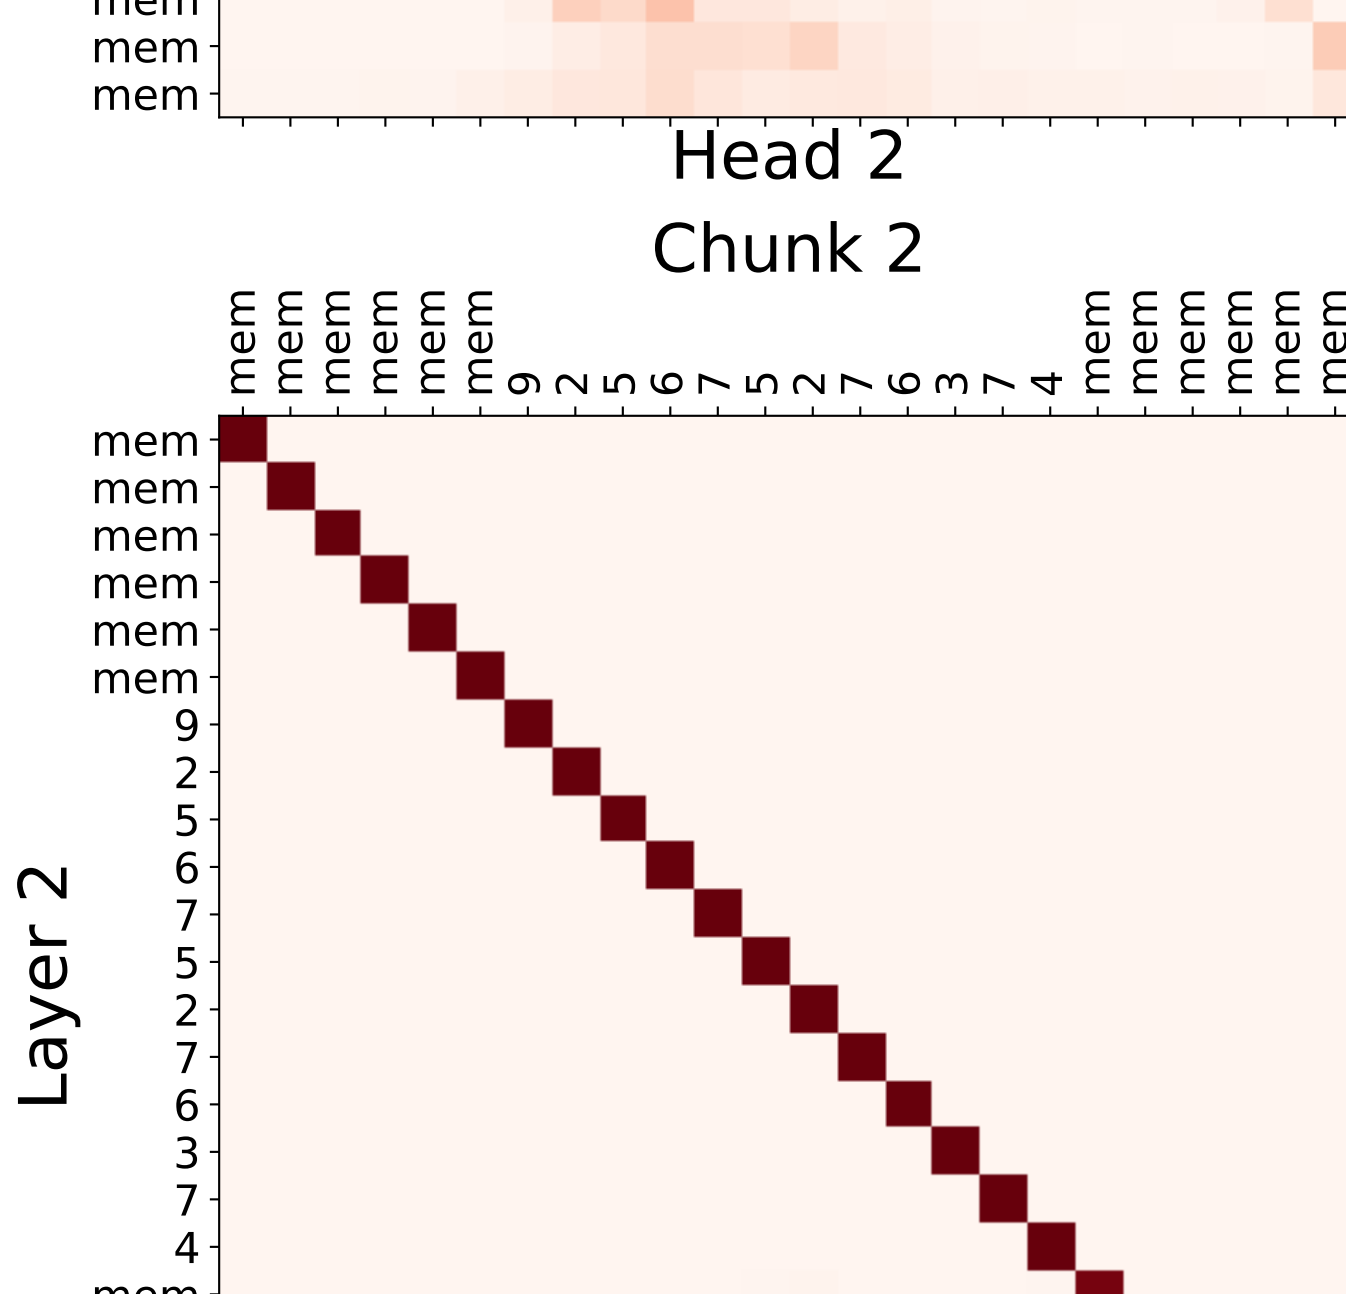

Head 2  
Chunk 2

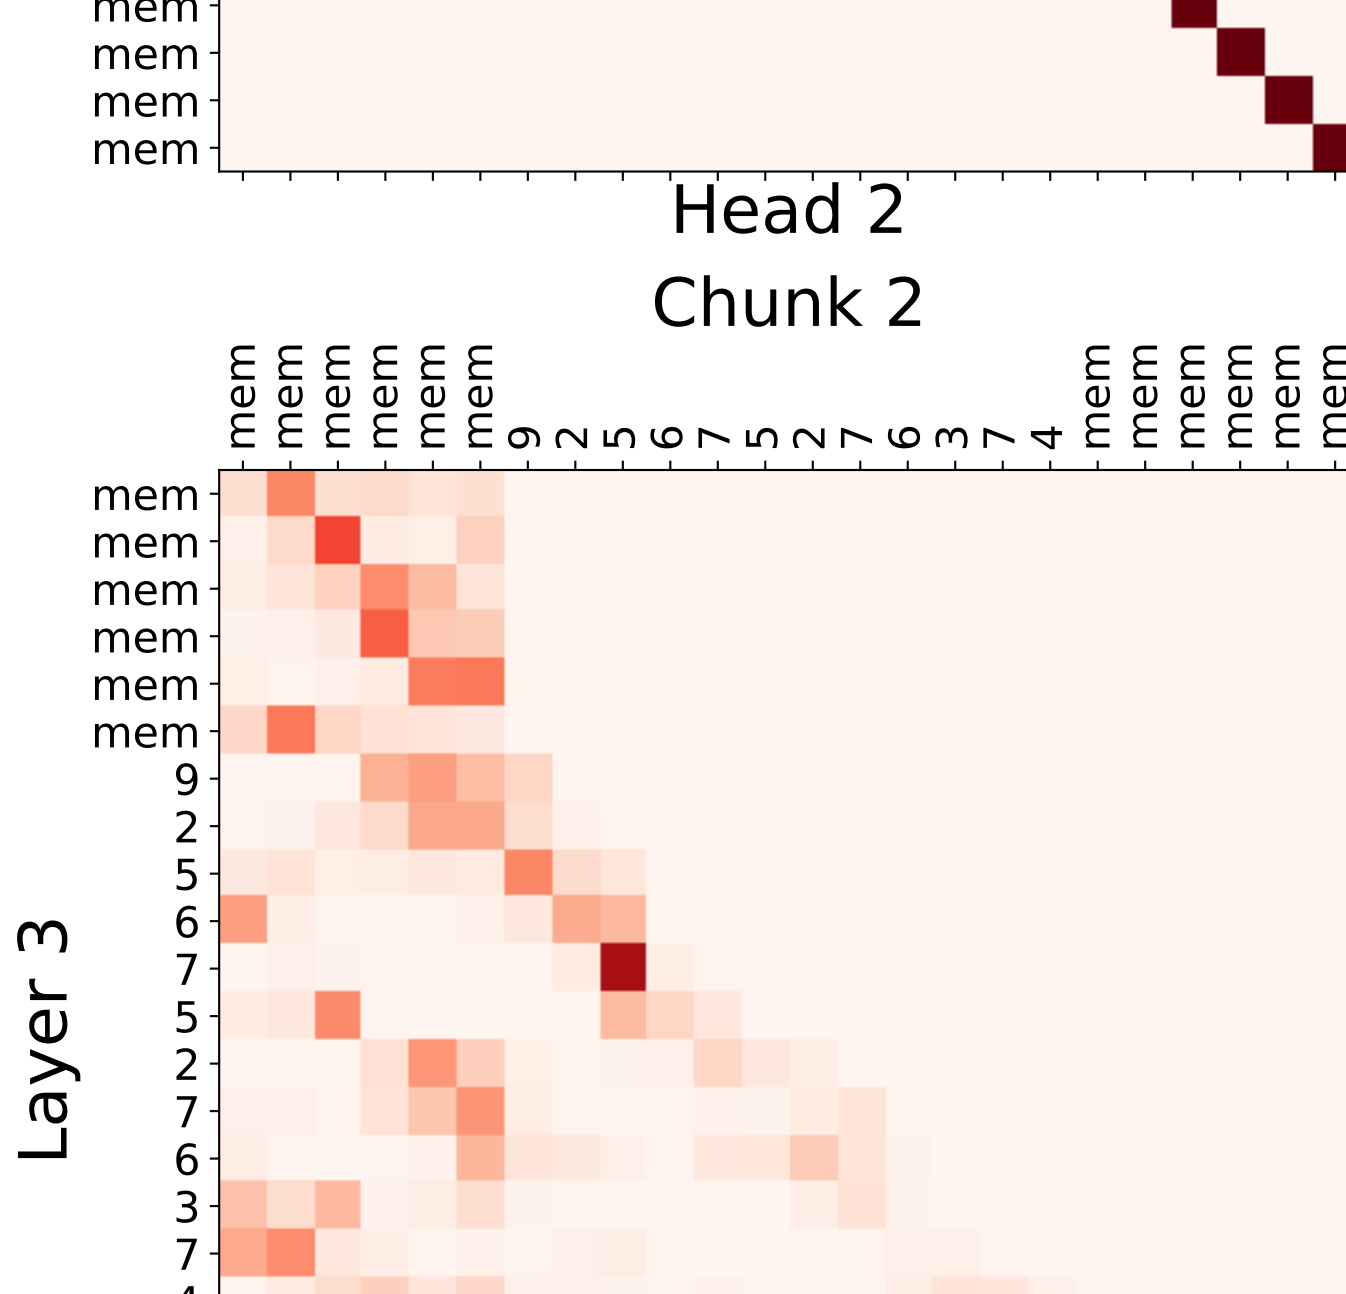

Head 2  
Chunk 2

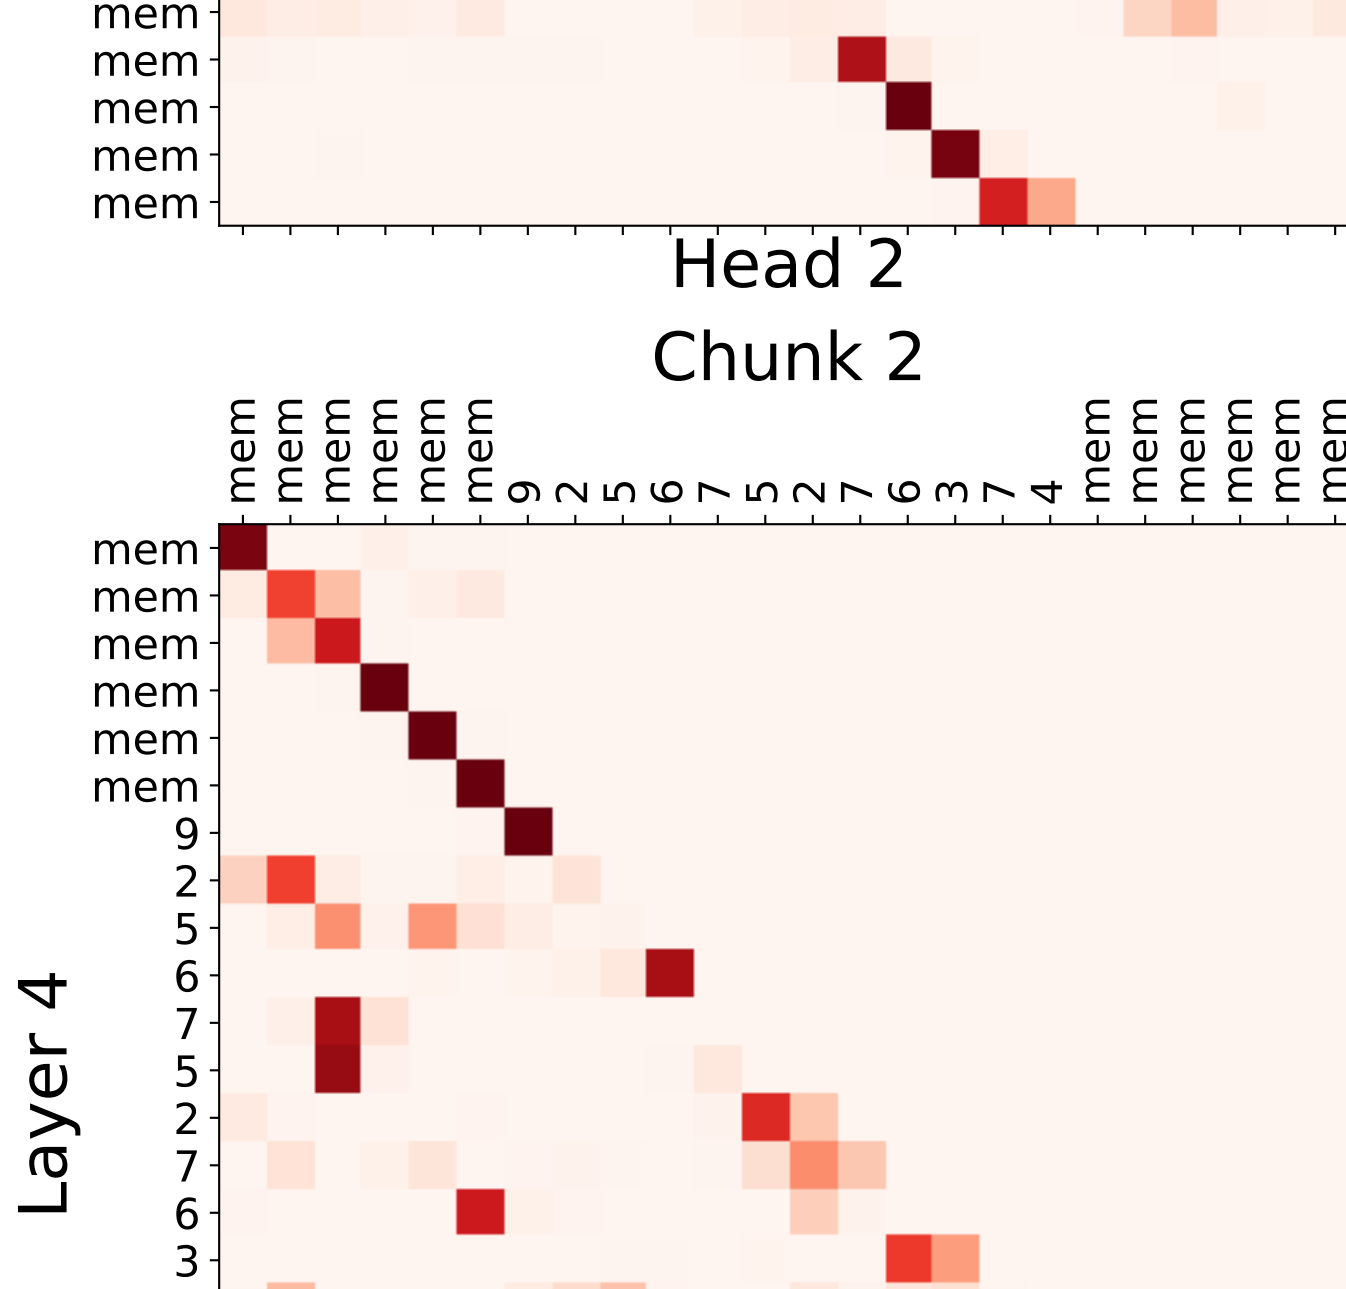

Head 2  
Chunk 3

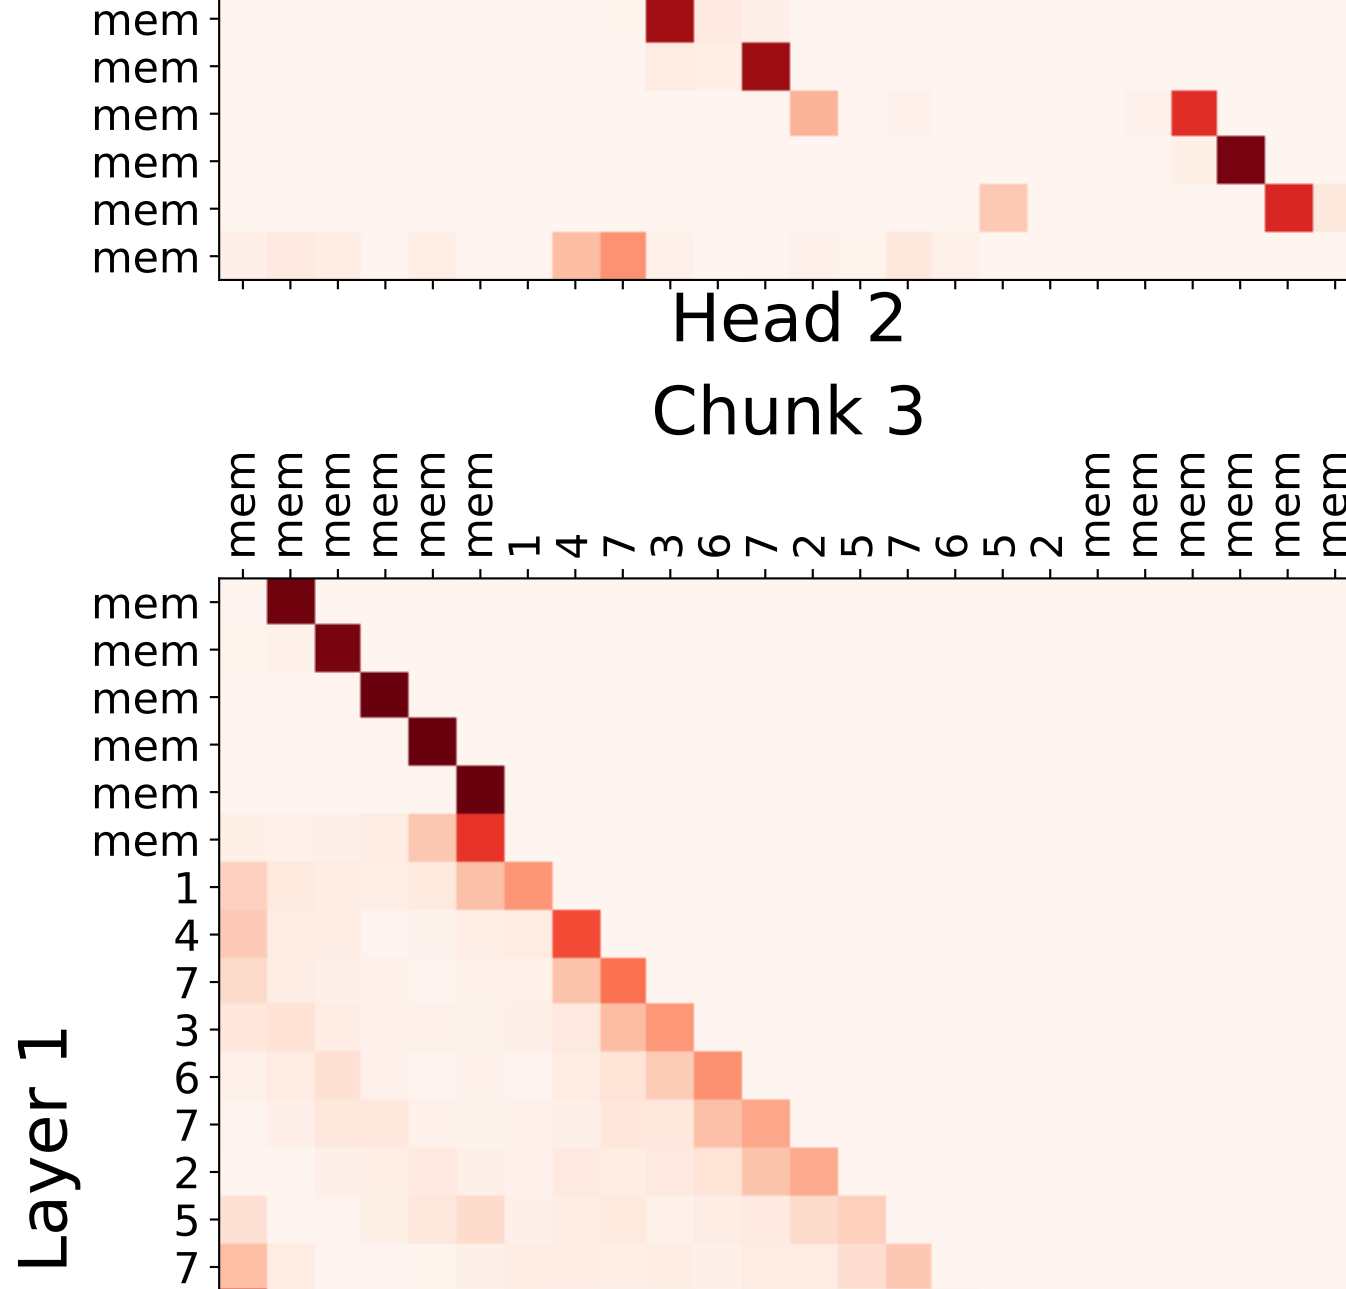

Head 2  
Chunk 3

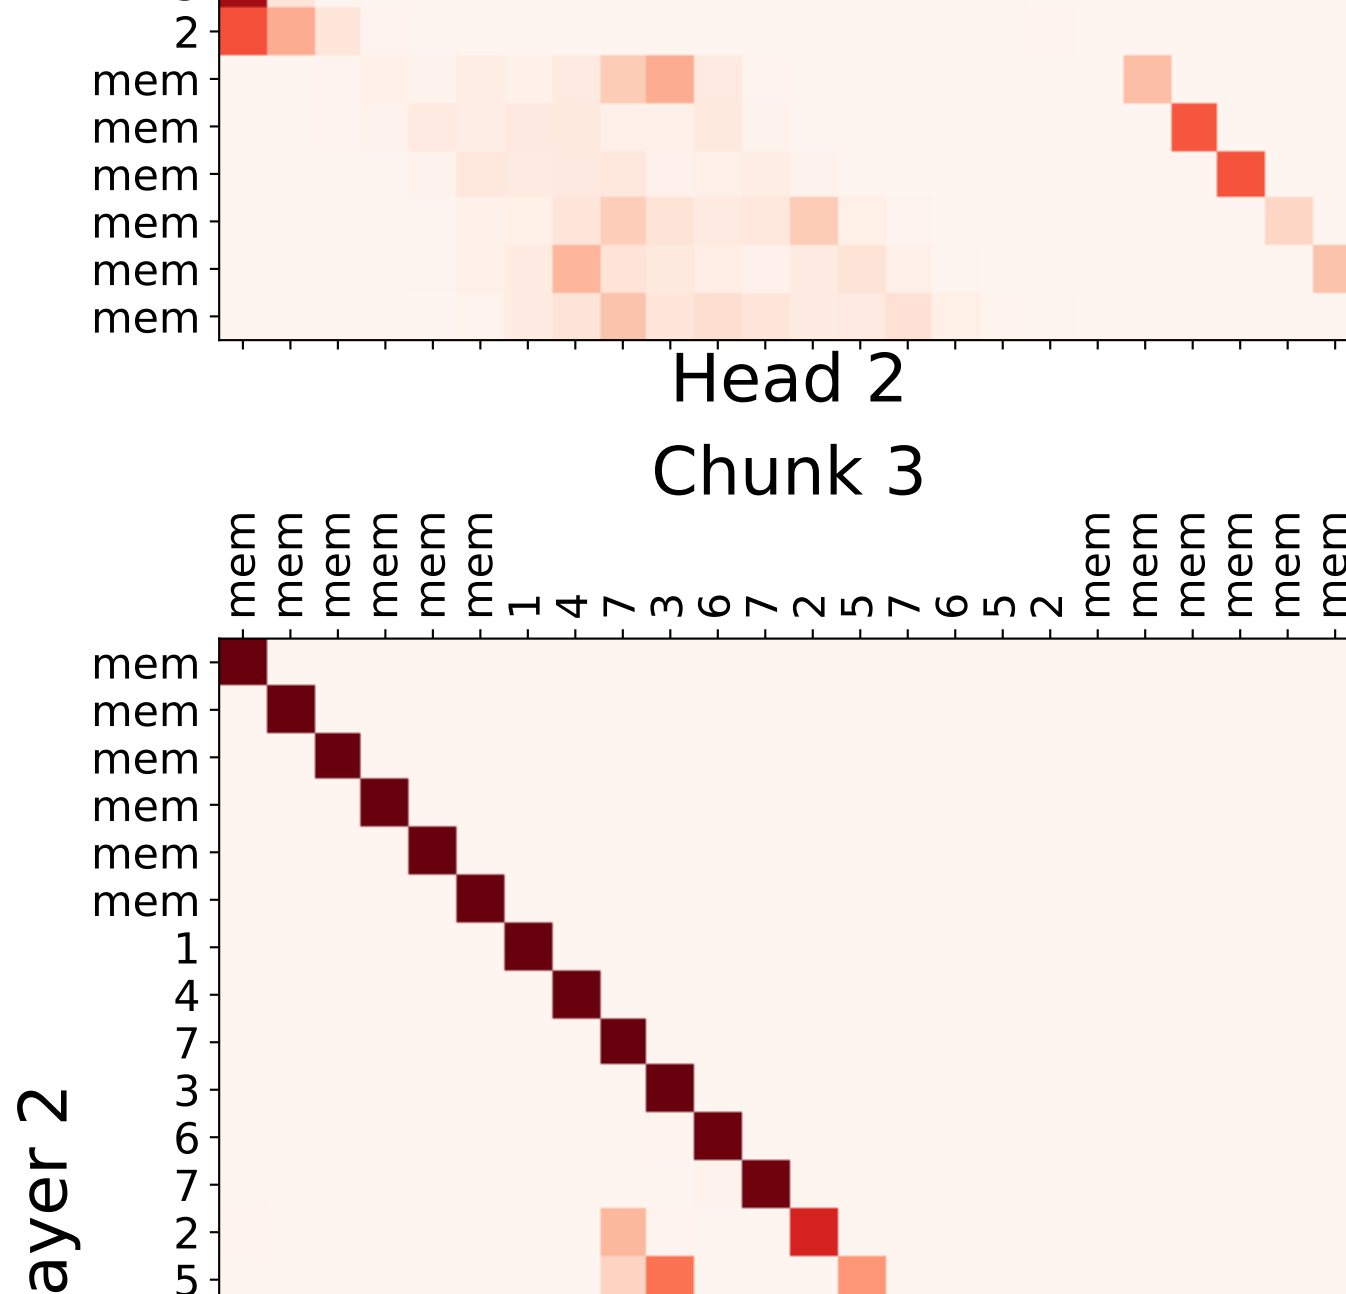

Head 2  
Chunk 3

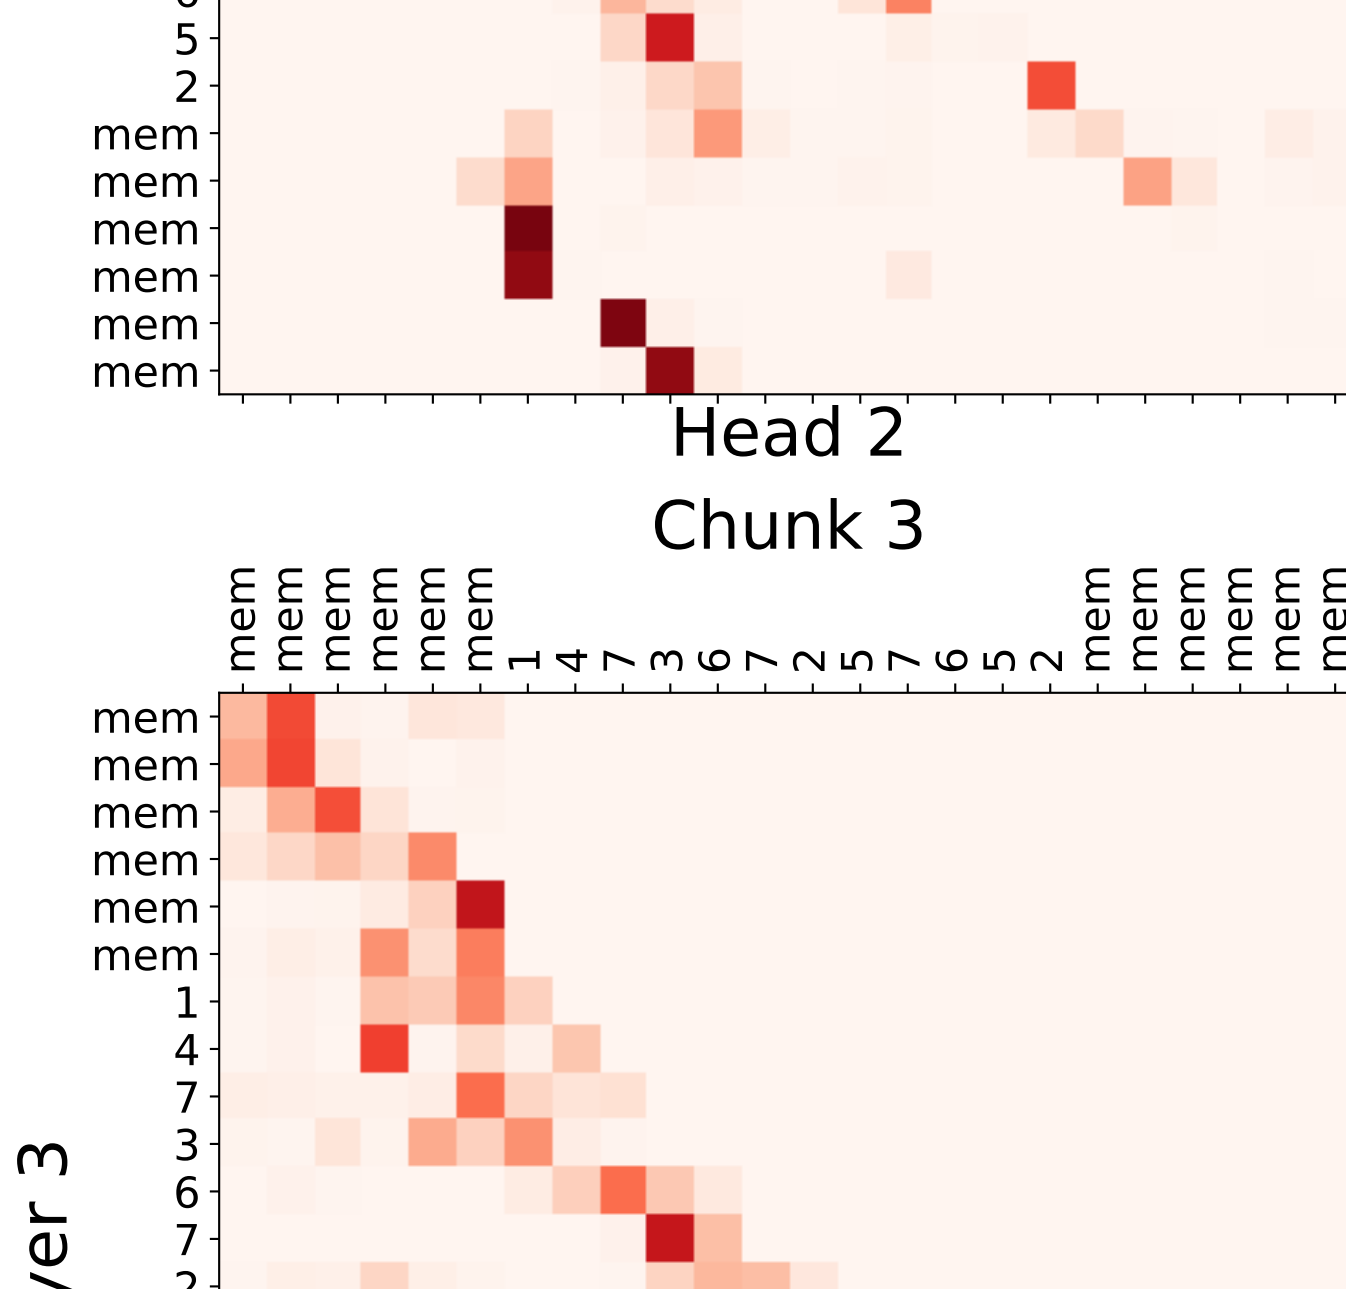

Head 2  
Chunk 3

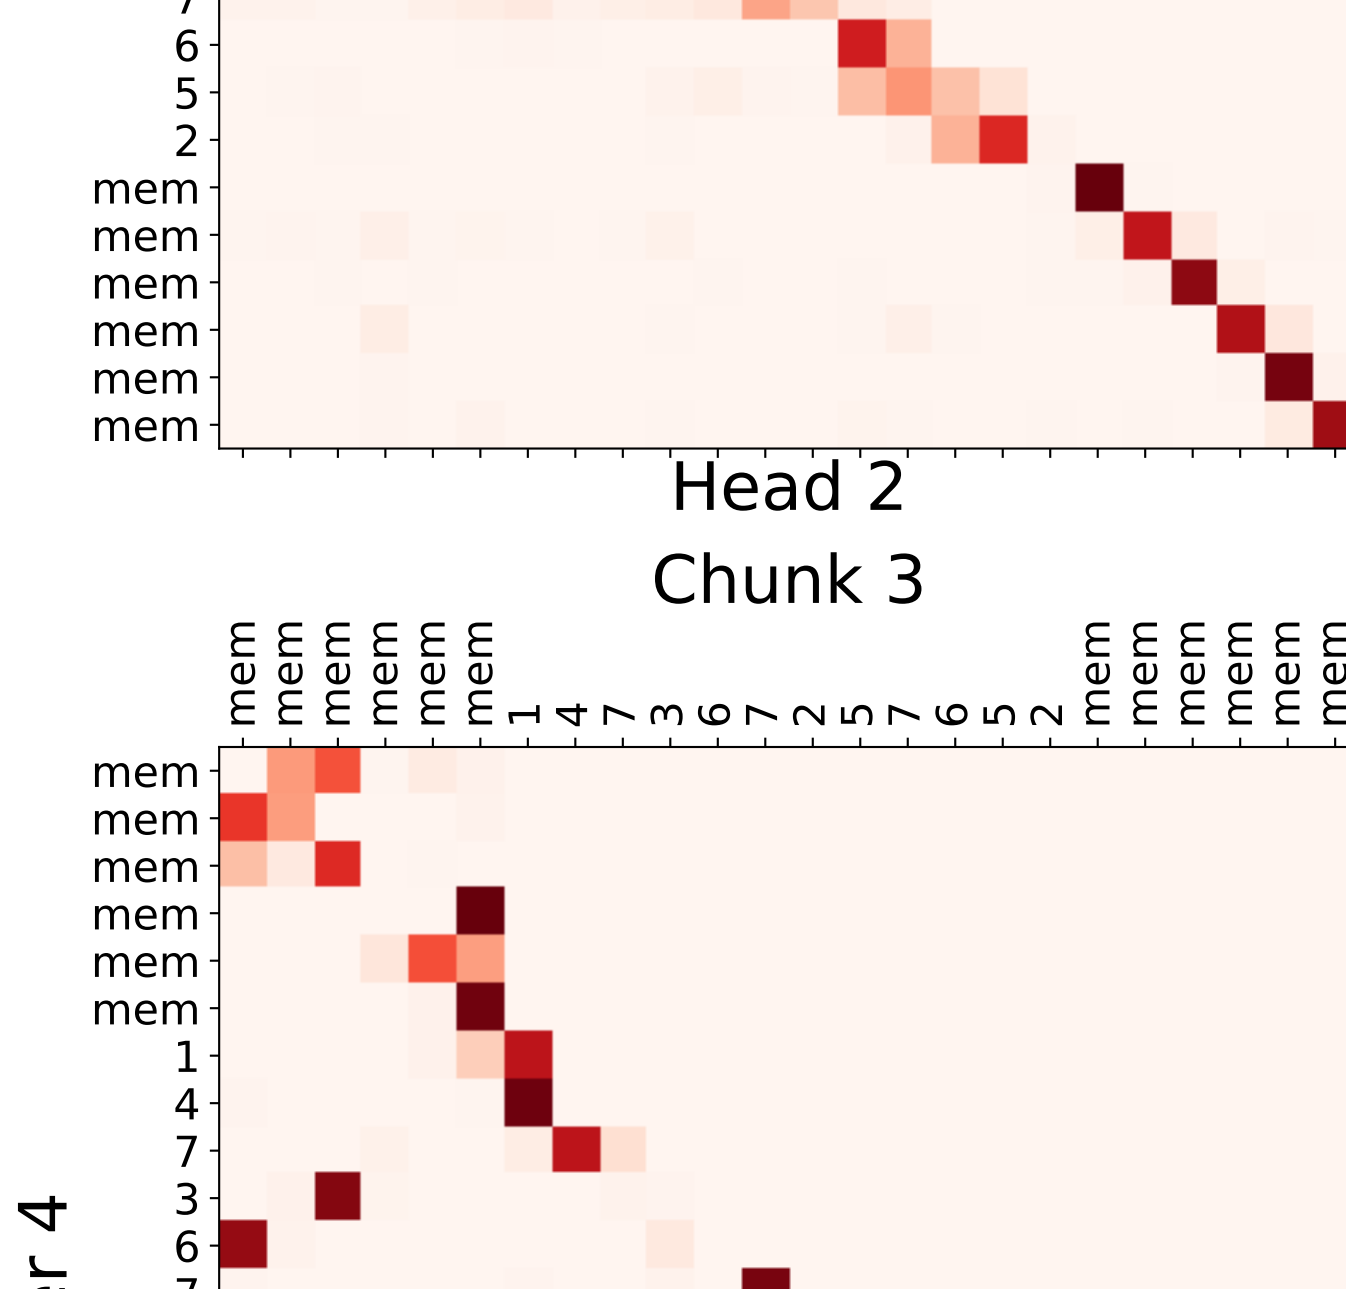

Head 2  
Chunk 4

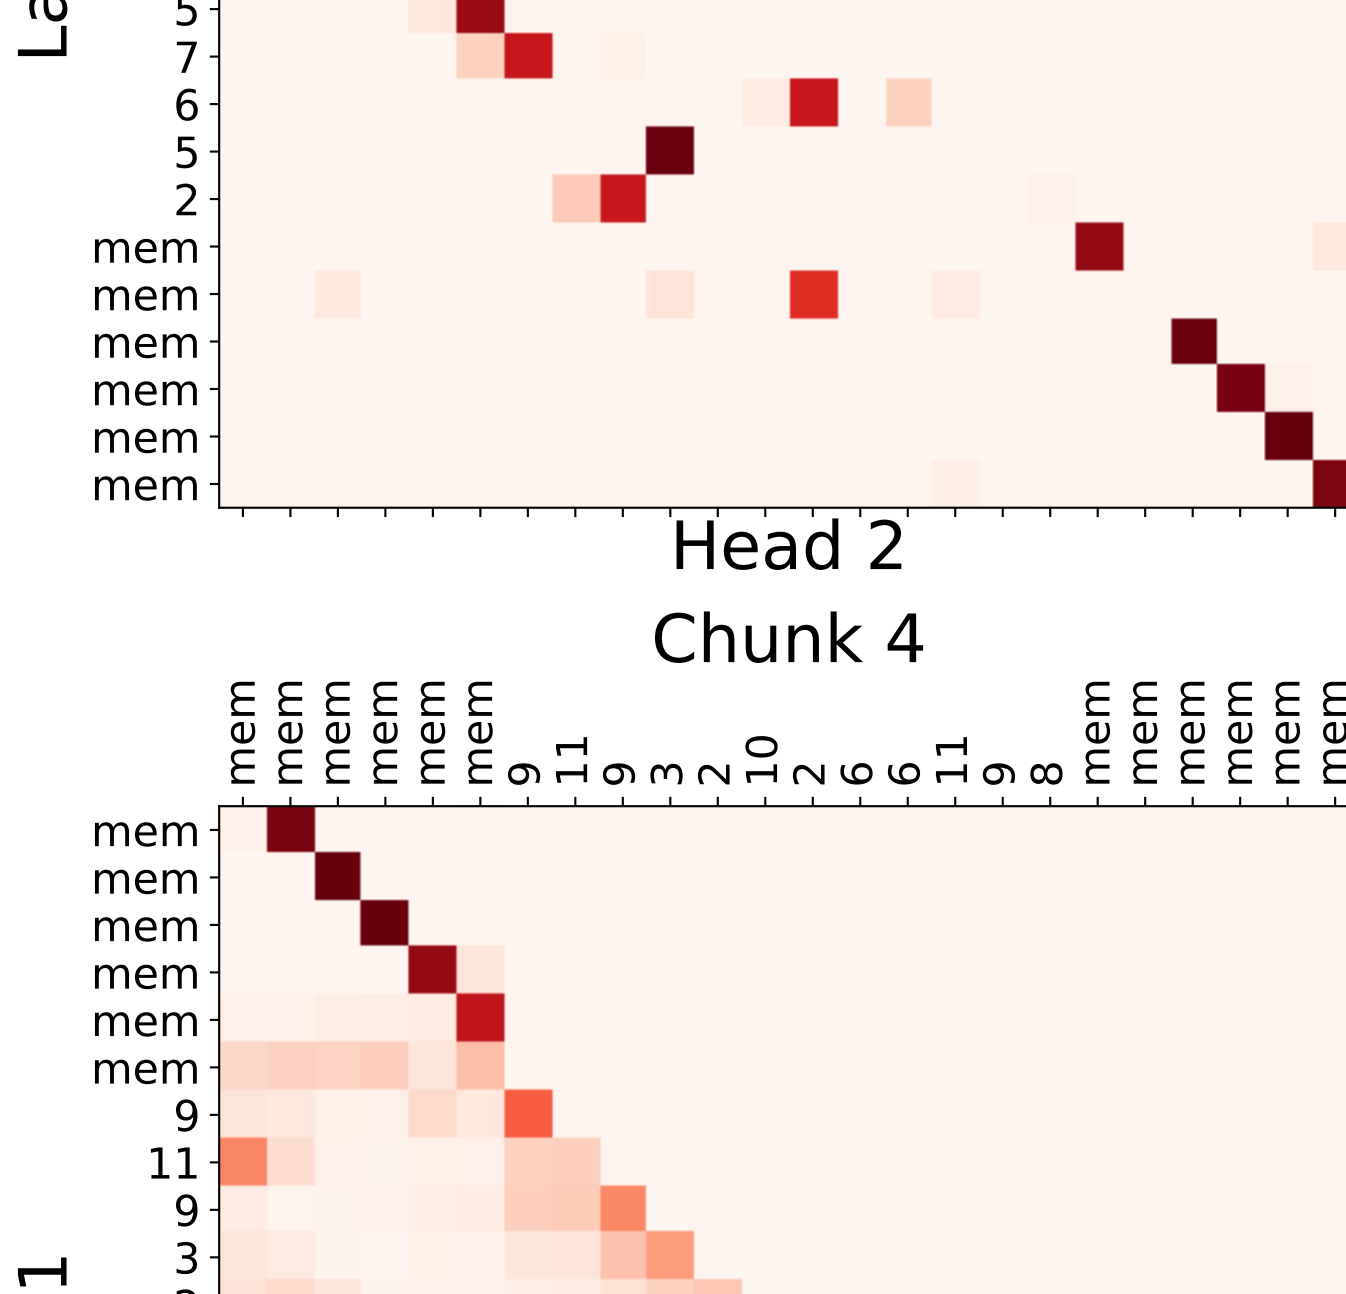

Head 2  
Chunk 4

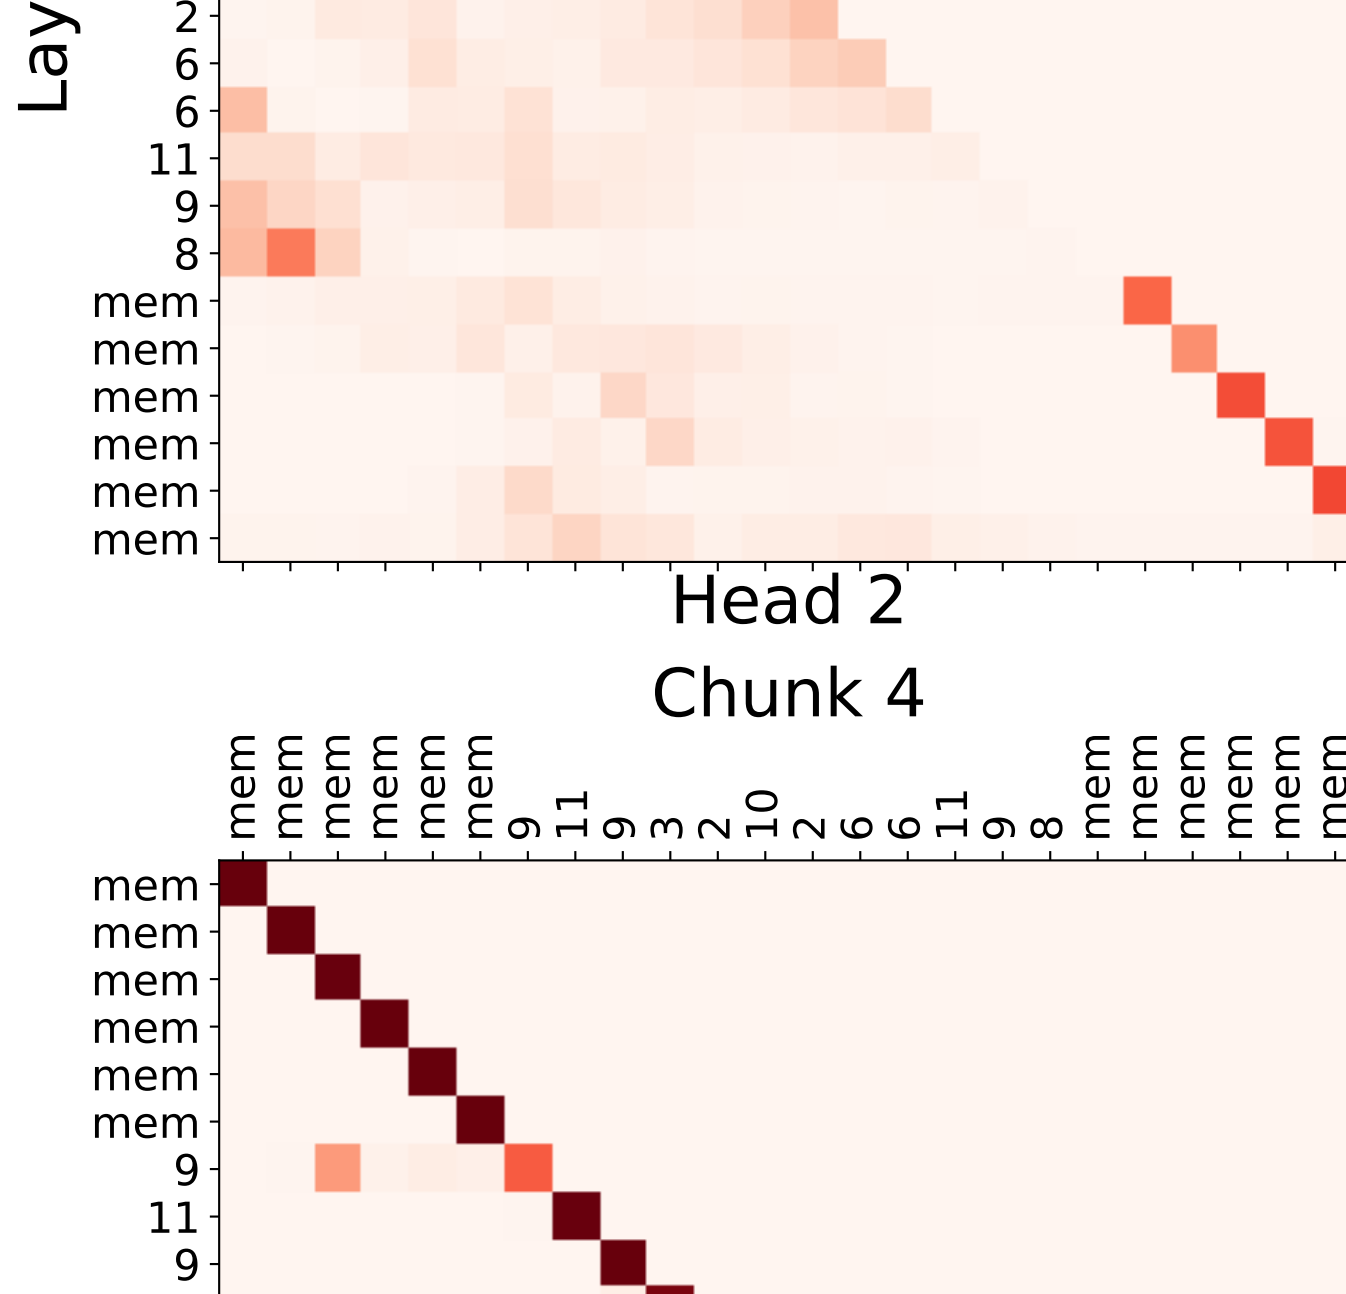

Head 2

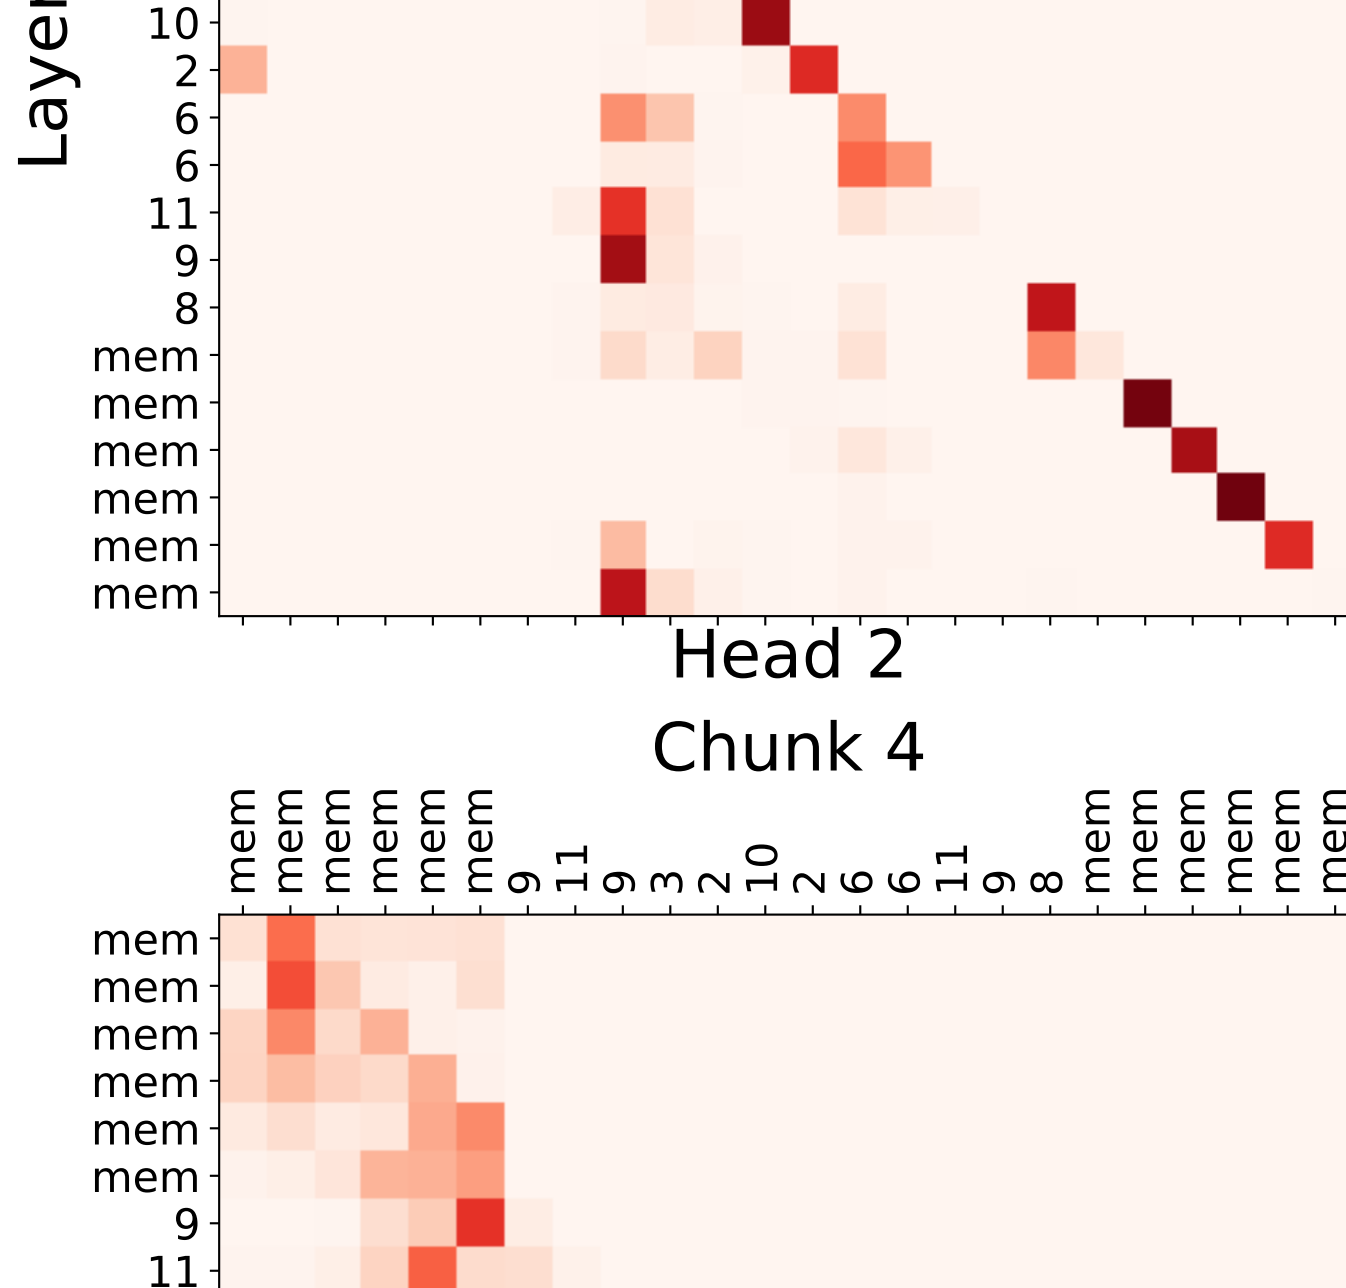

Head 3

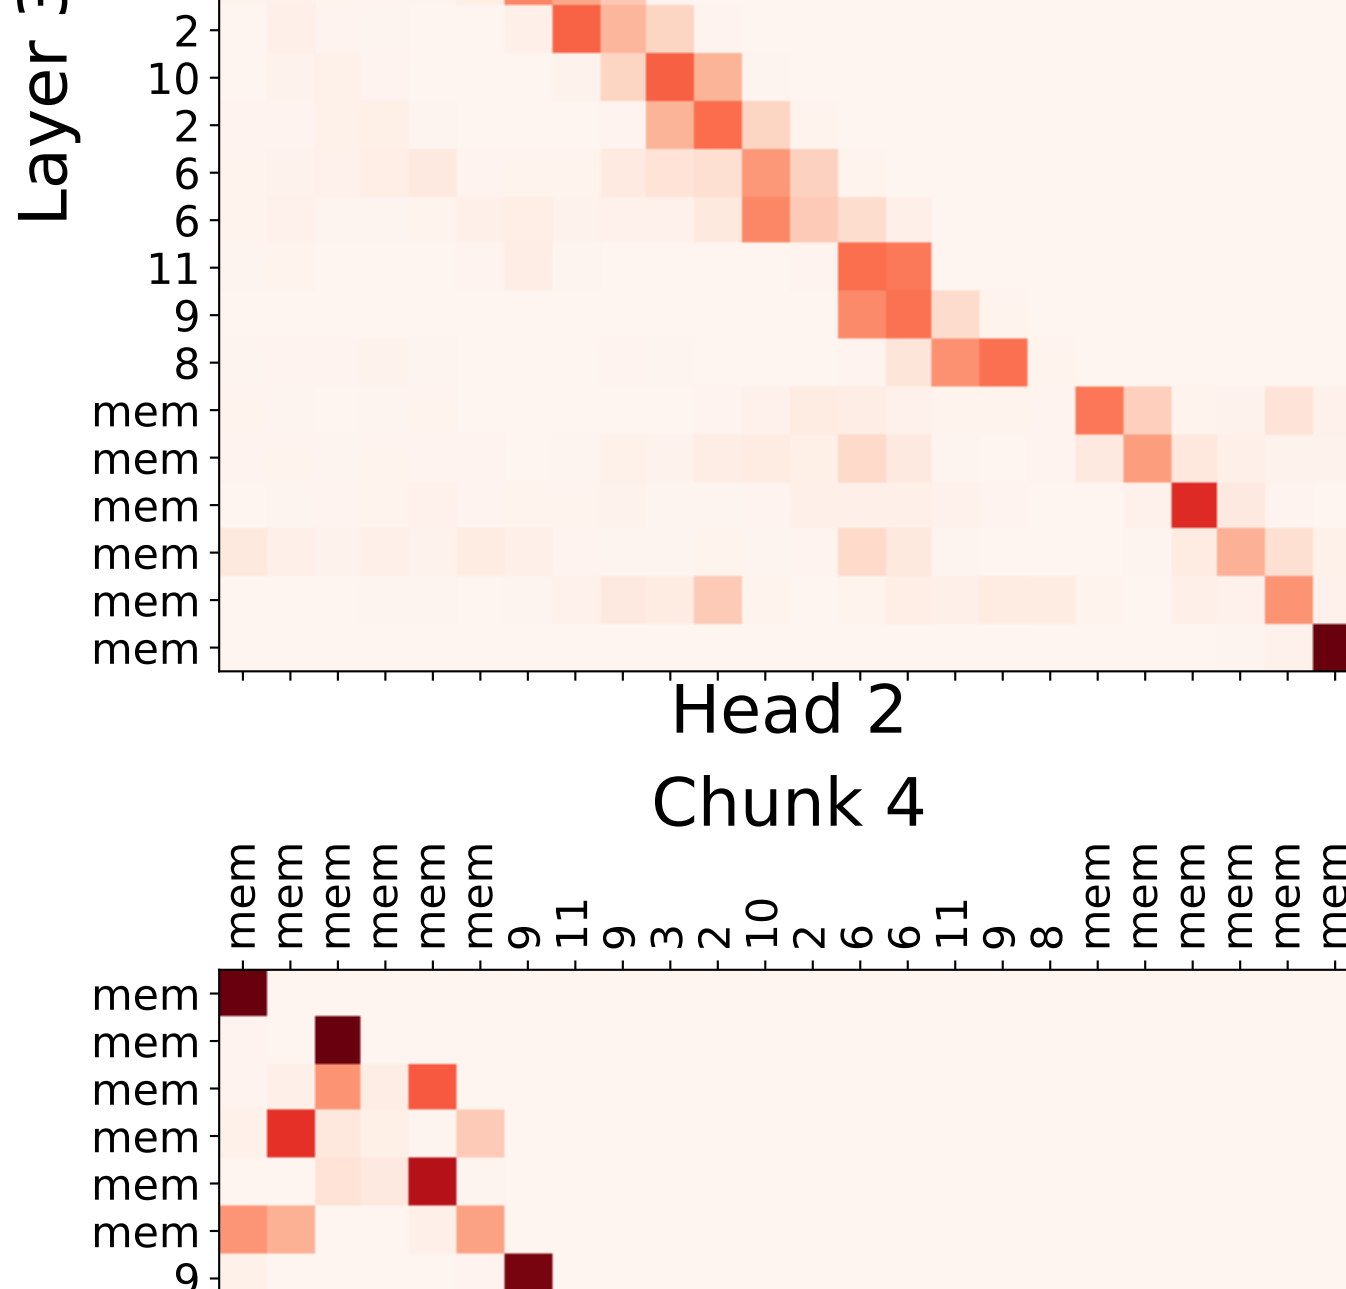

Head 3

Chunk 1

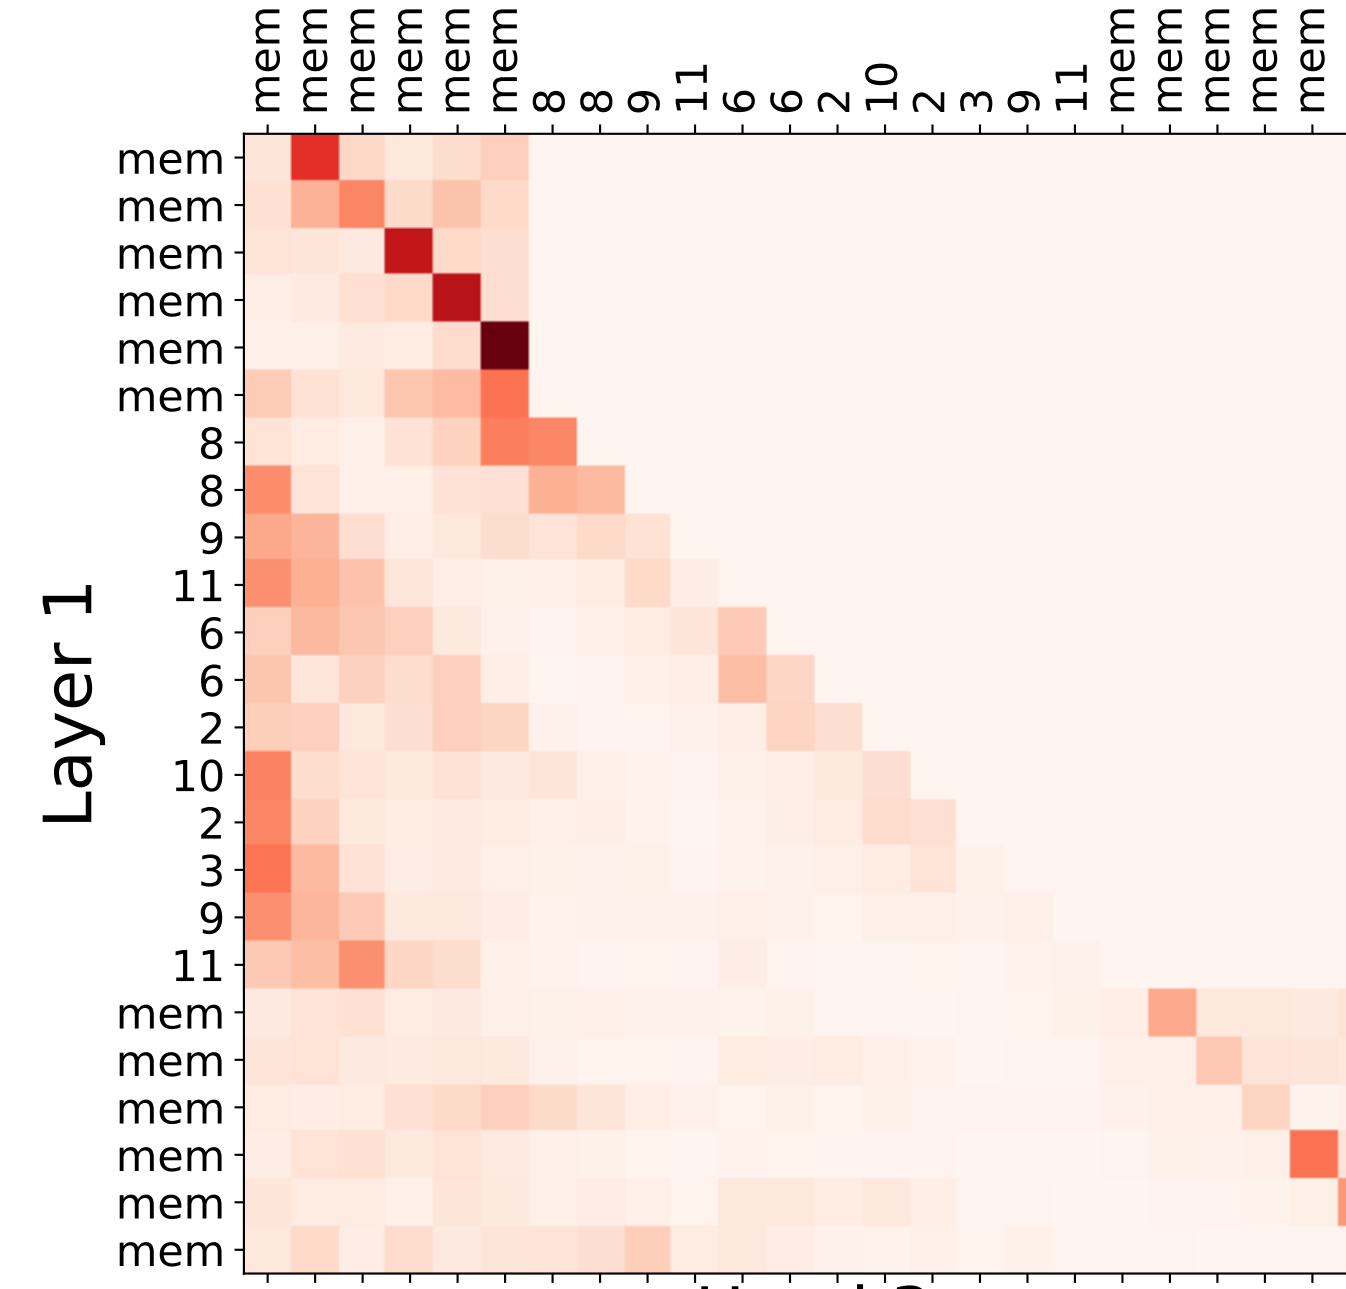

Head 3  
Chunk 1

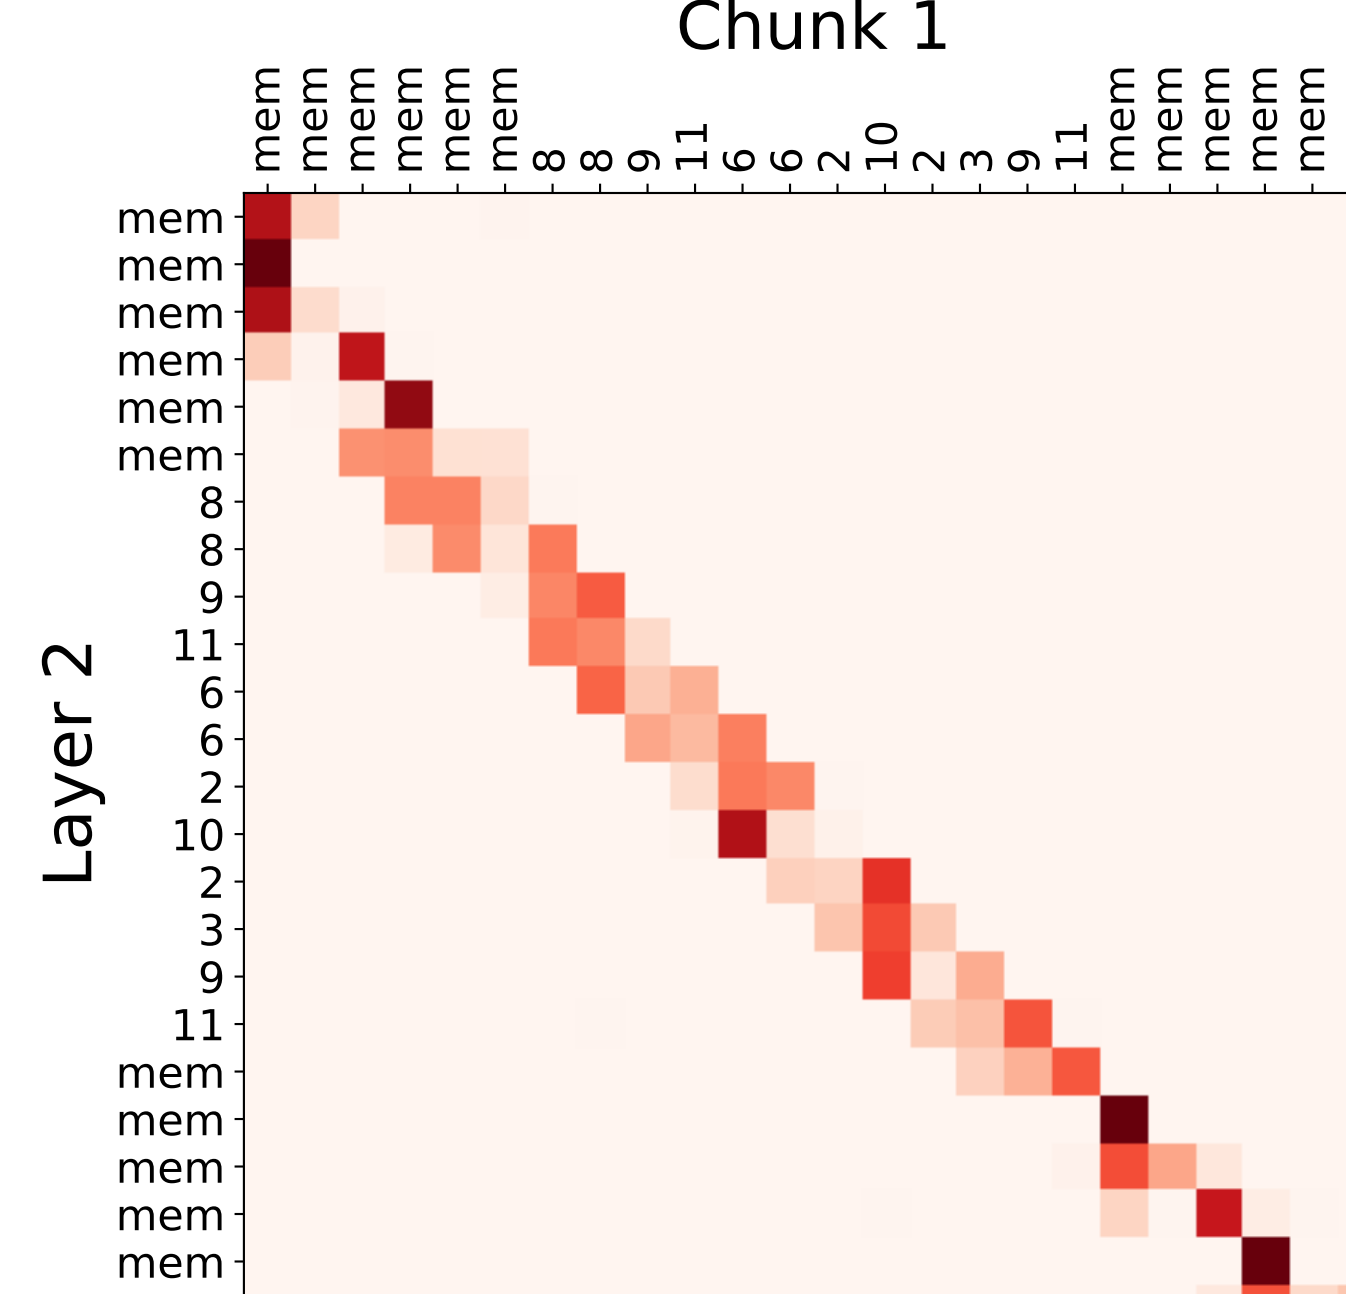

Head 3  
Chunk 1

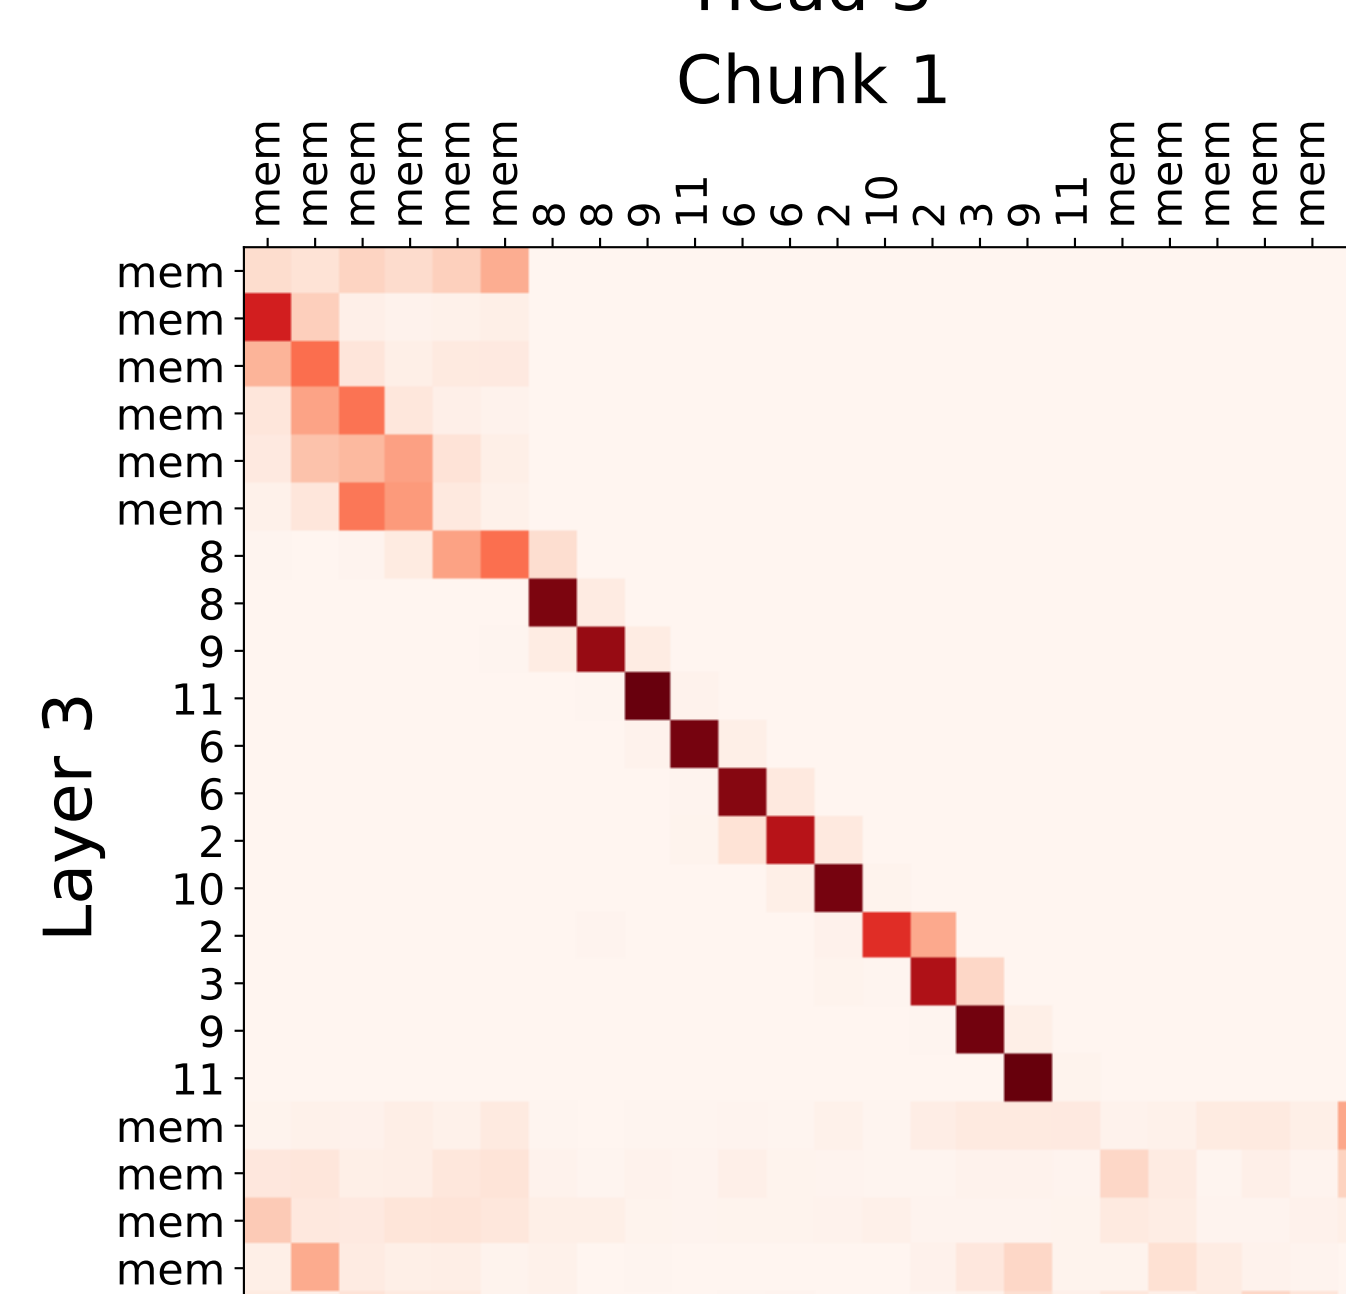

Head 3  
Chunk 1

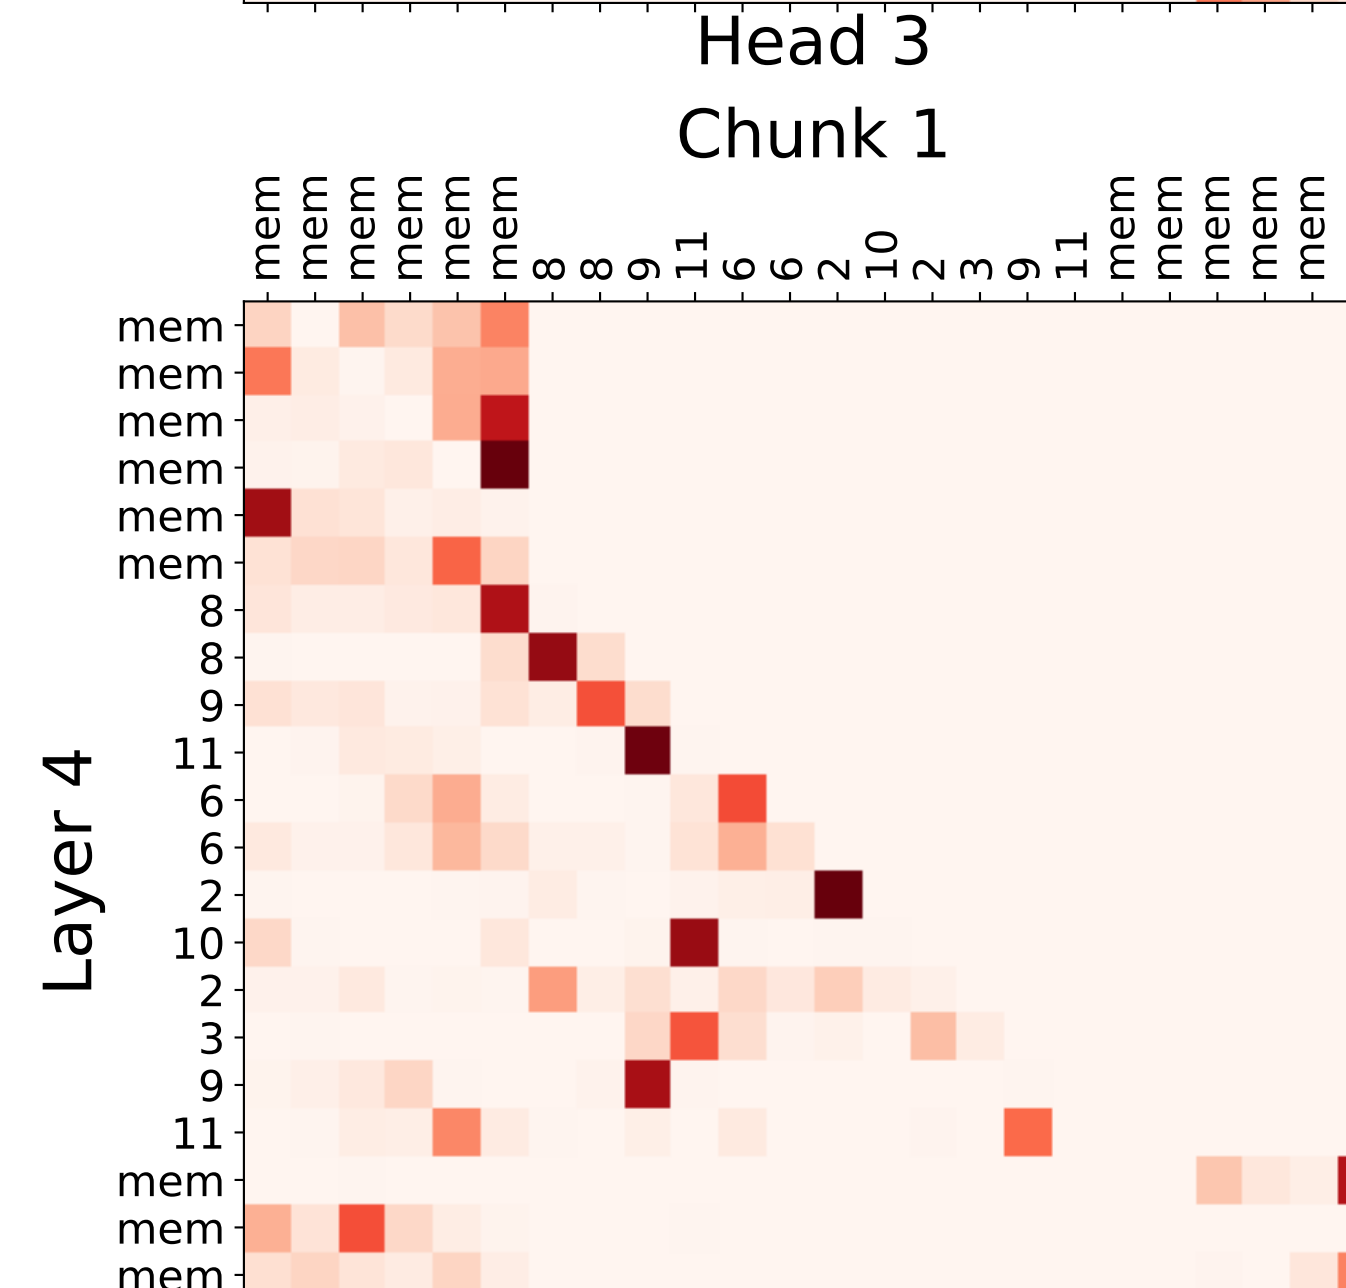

Head 3  
Chunk 2

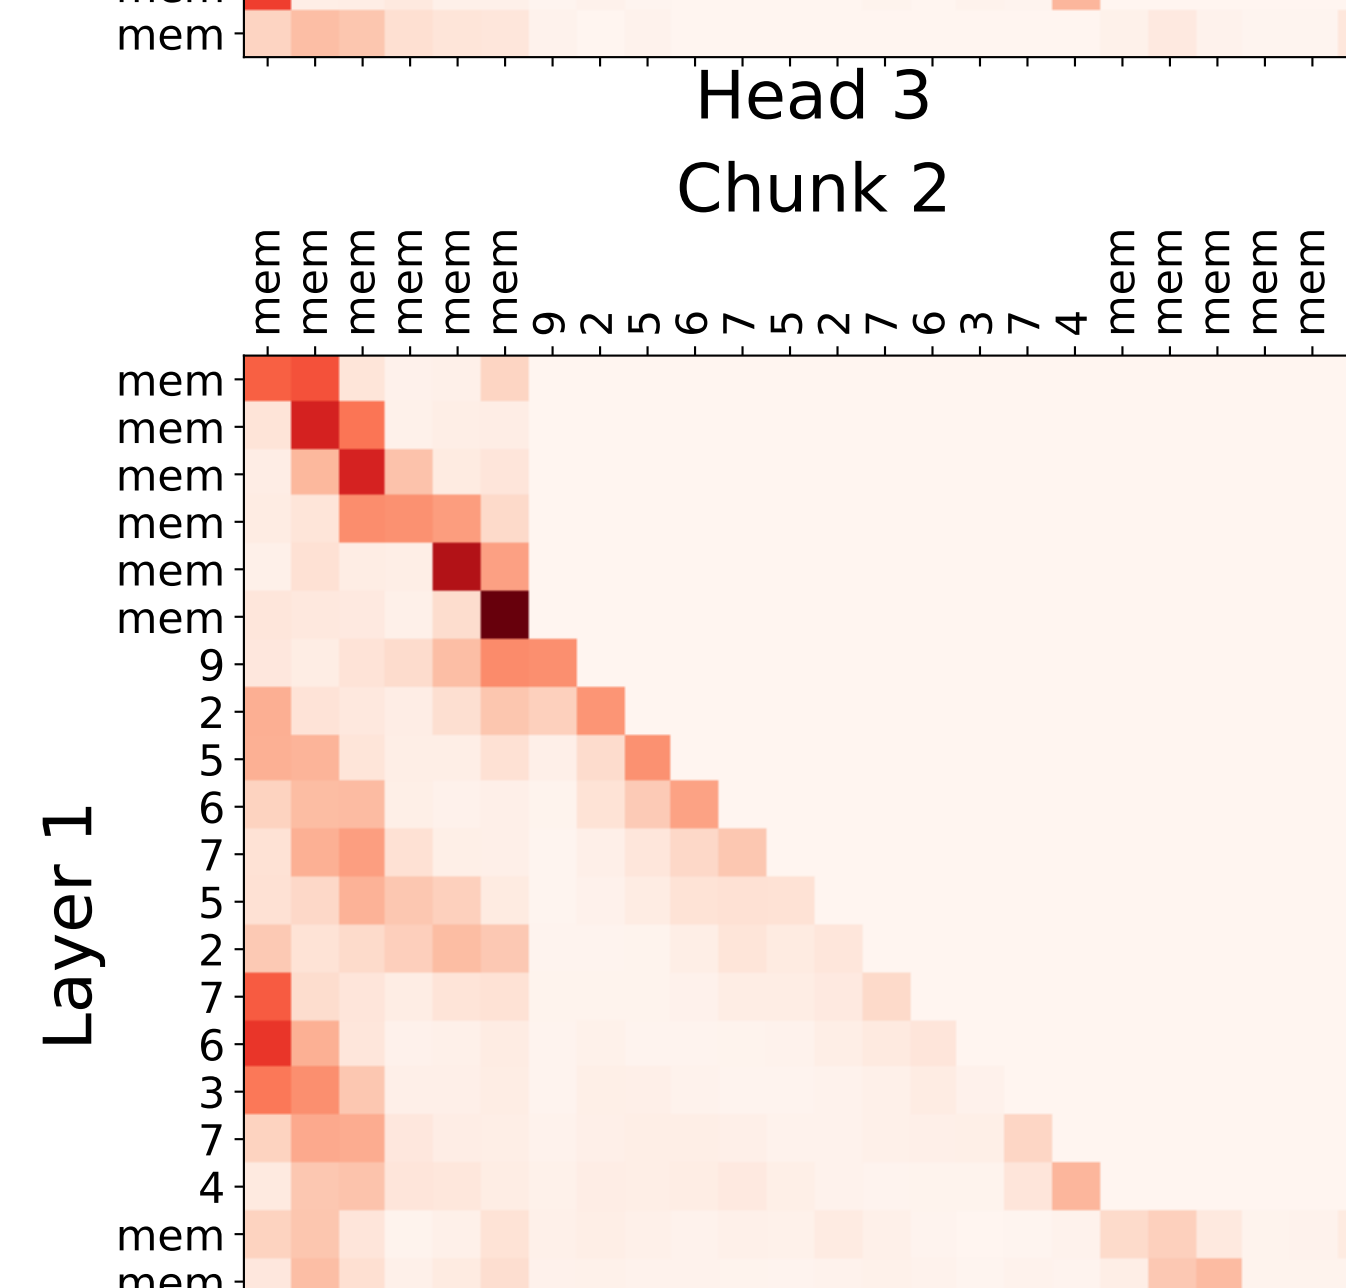

Head 3  
Chunk 2

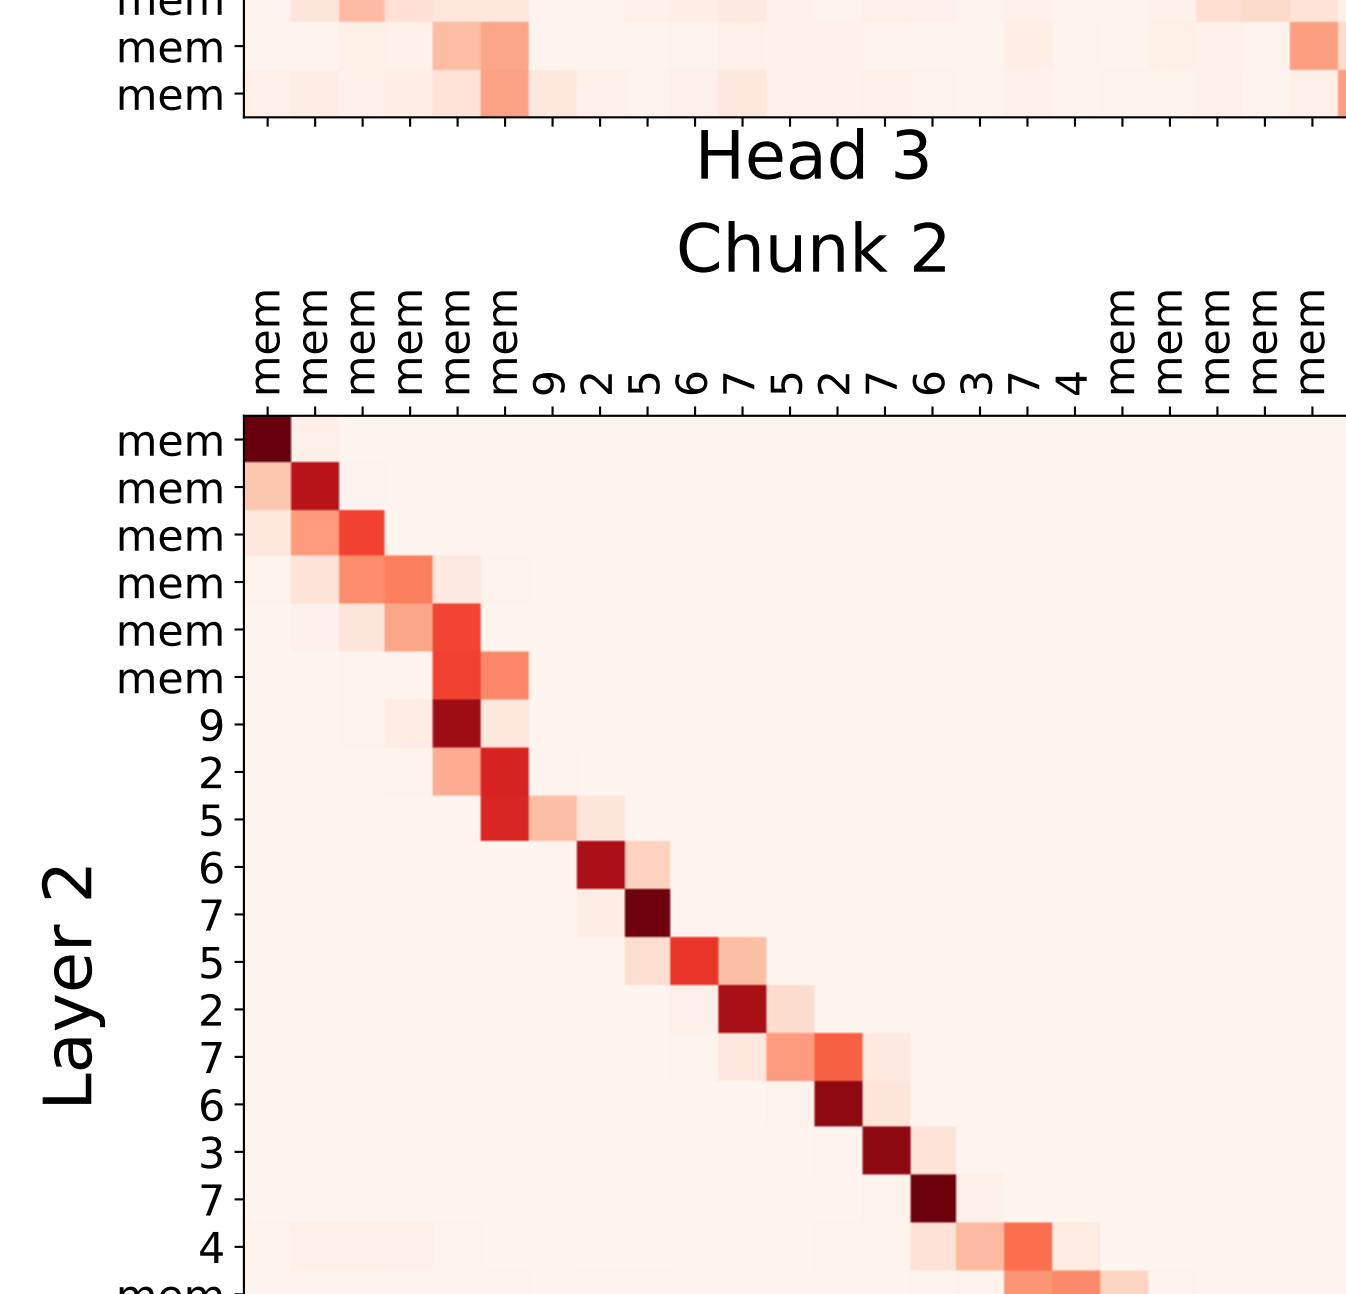

Head 3  
Chunk 2

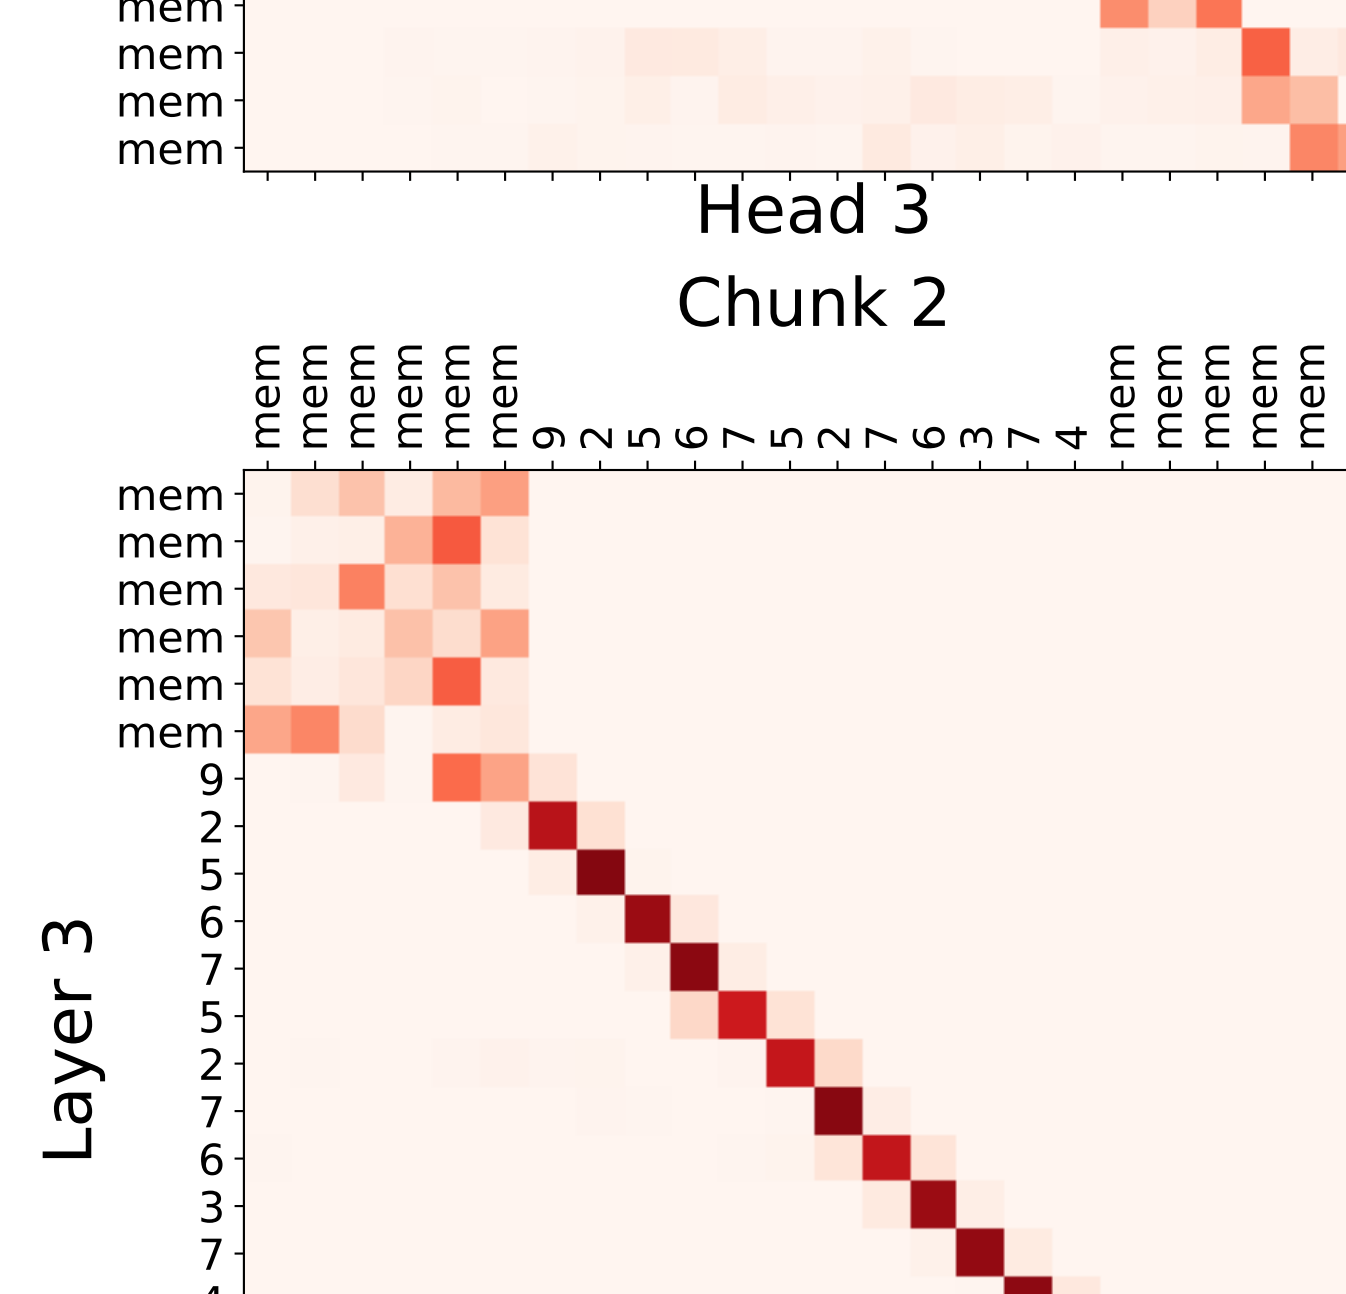

Head 3  
Chunk 2

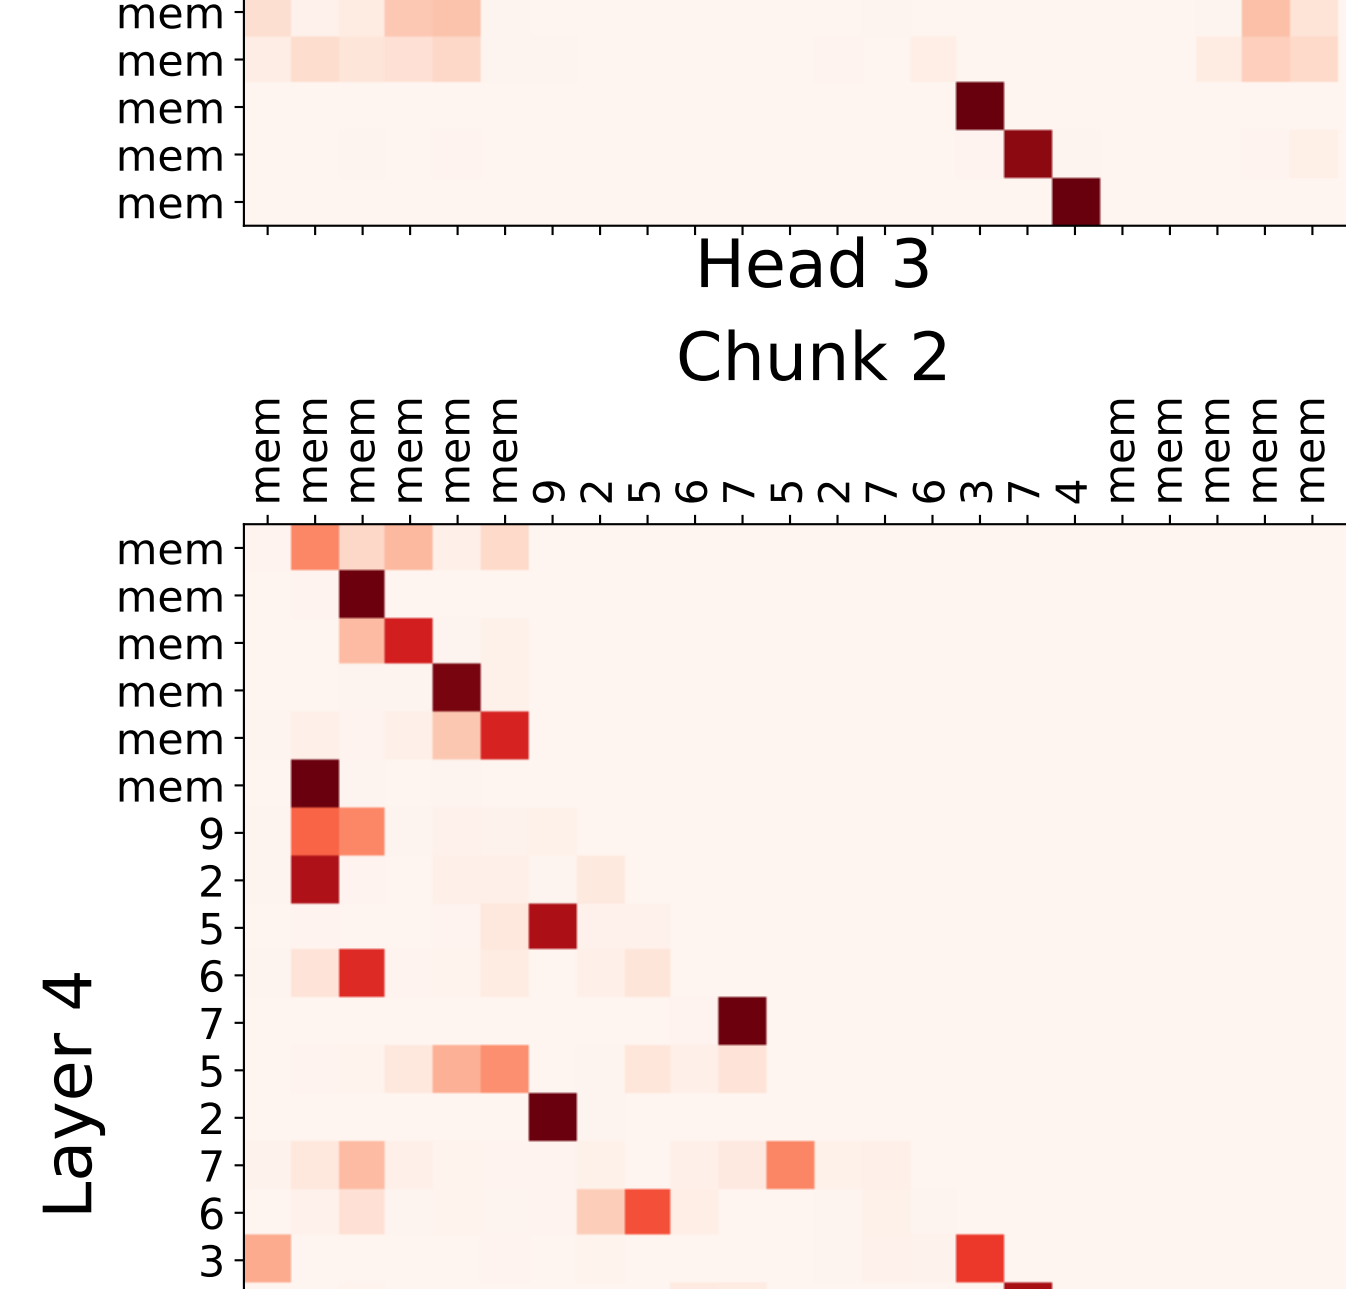

Head 3  
Chunk 3

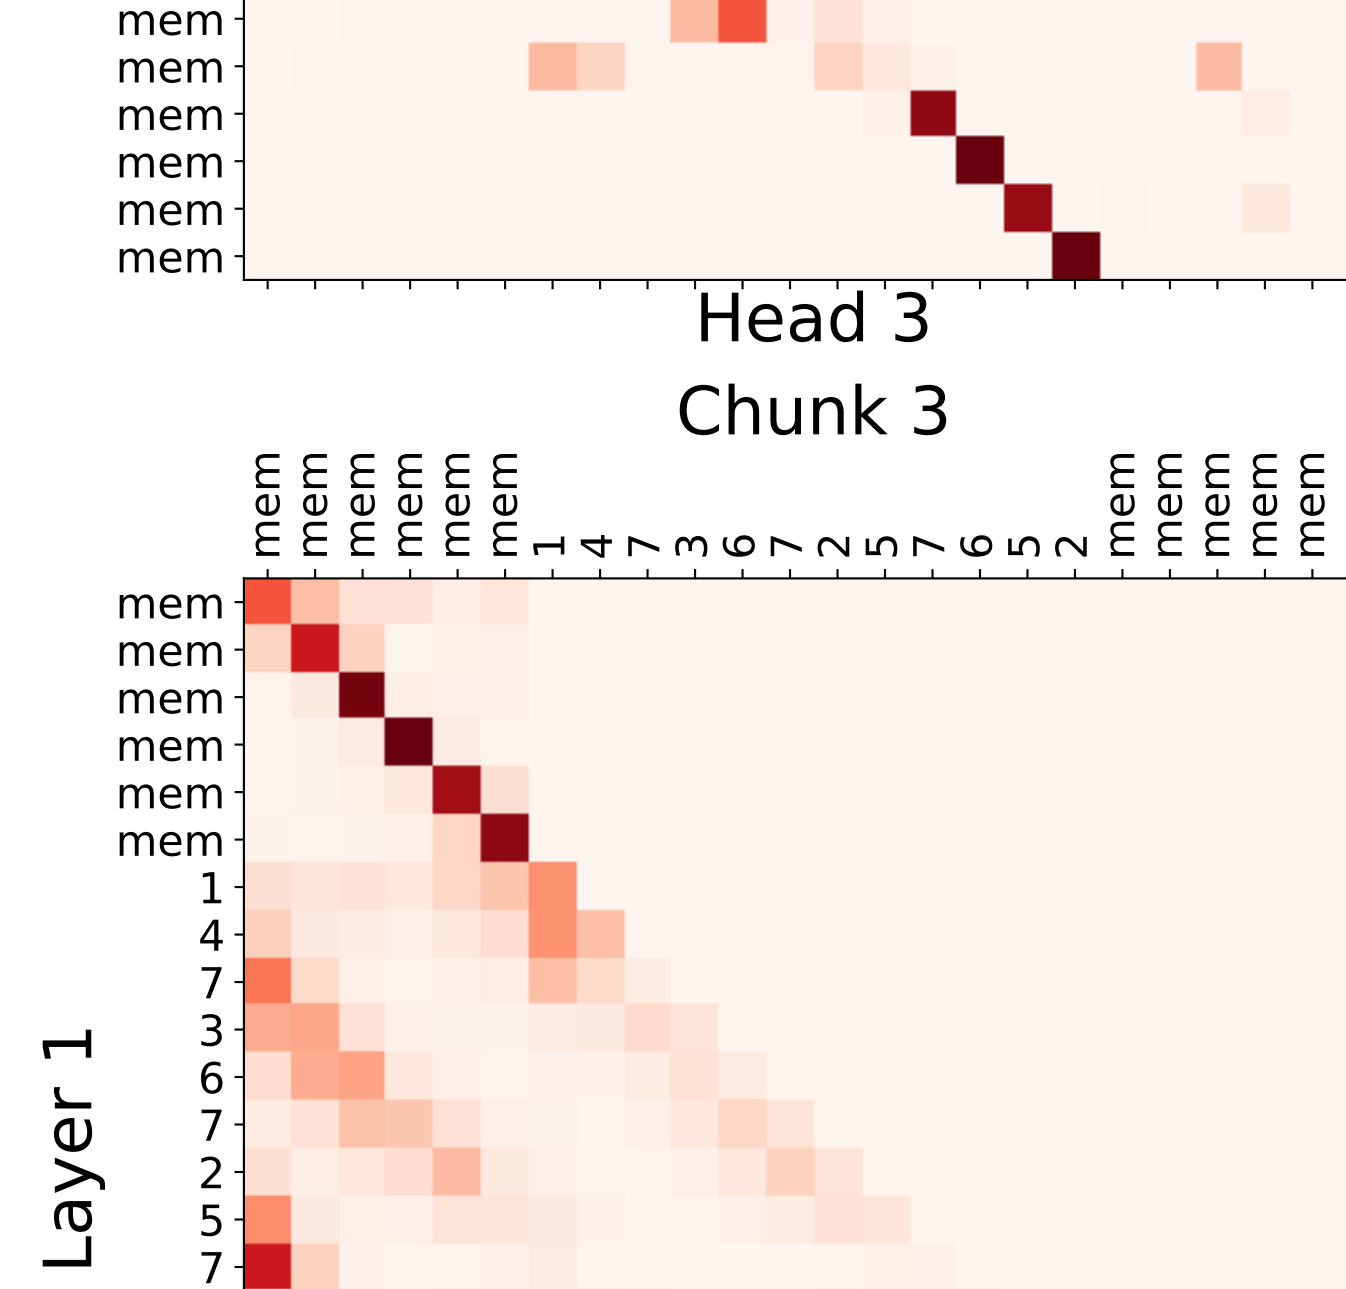

Head 3  
Chunk 3

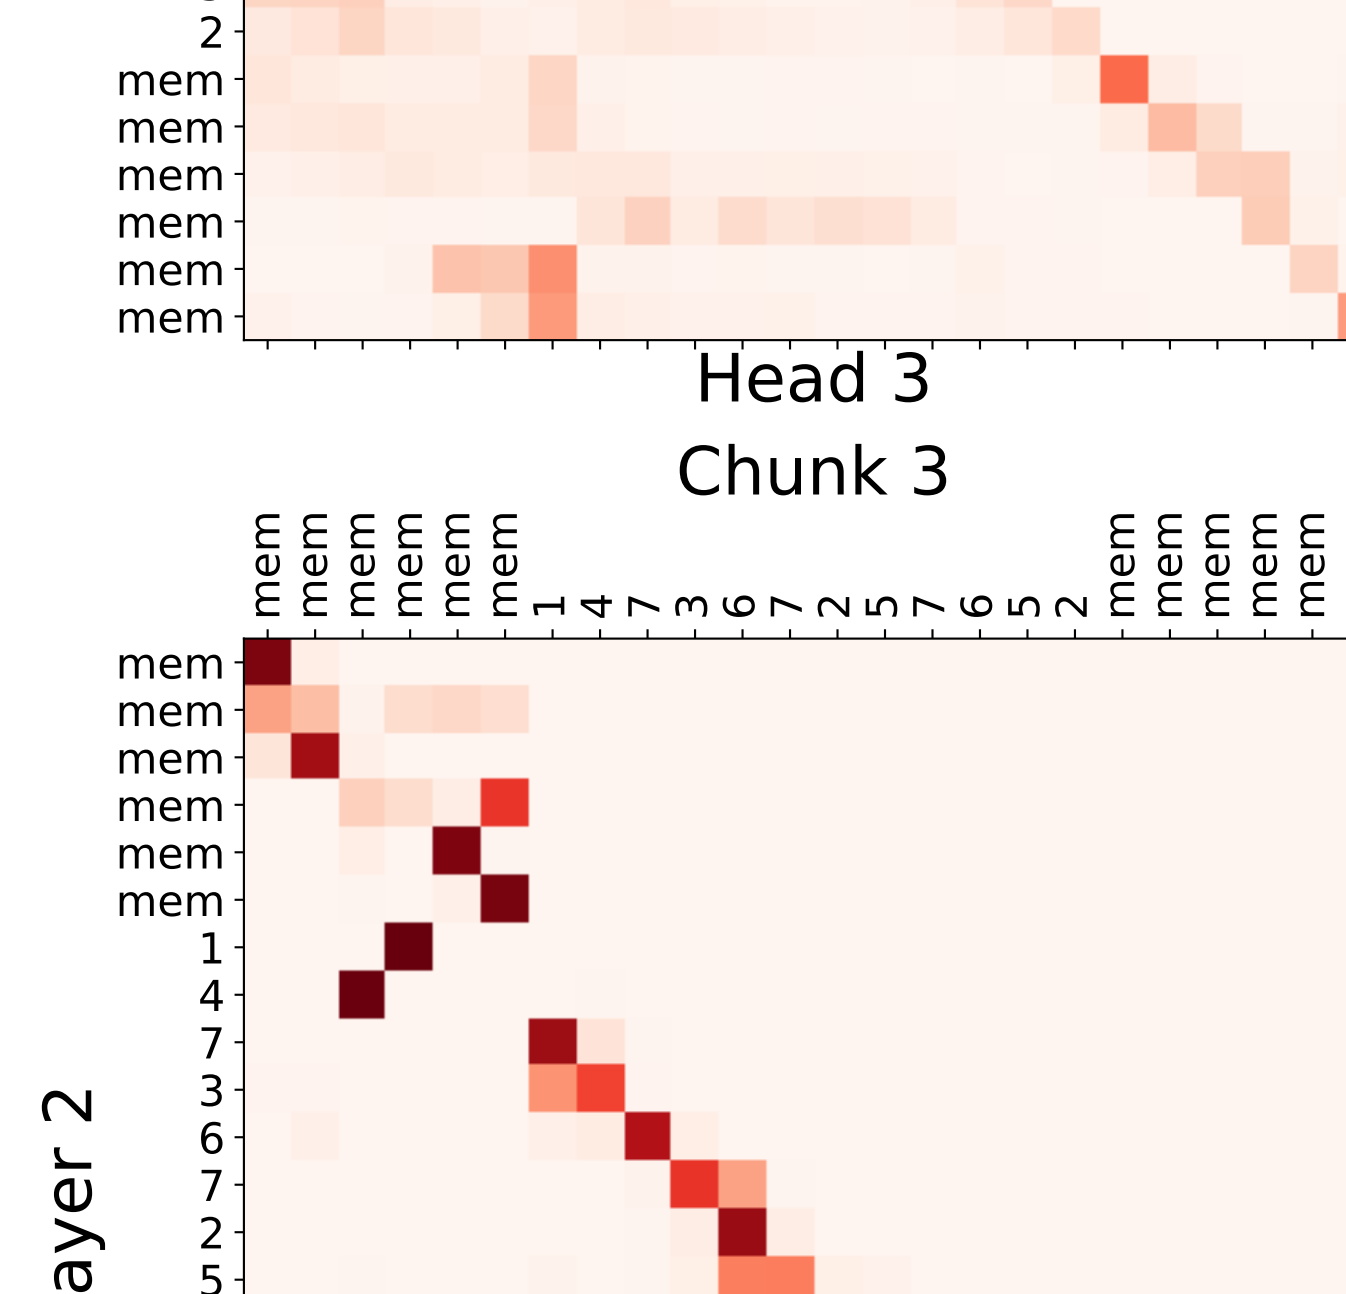

Head 3  
Chunk 3

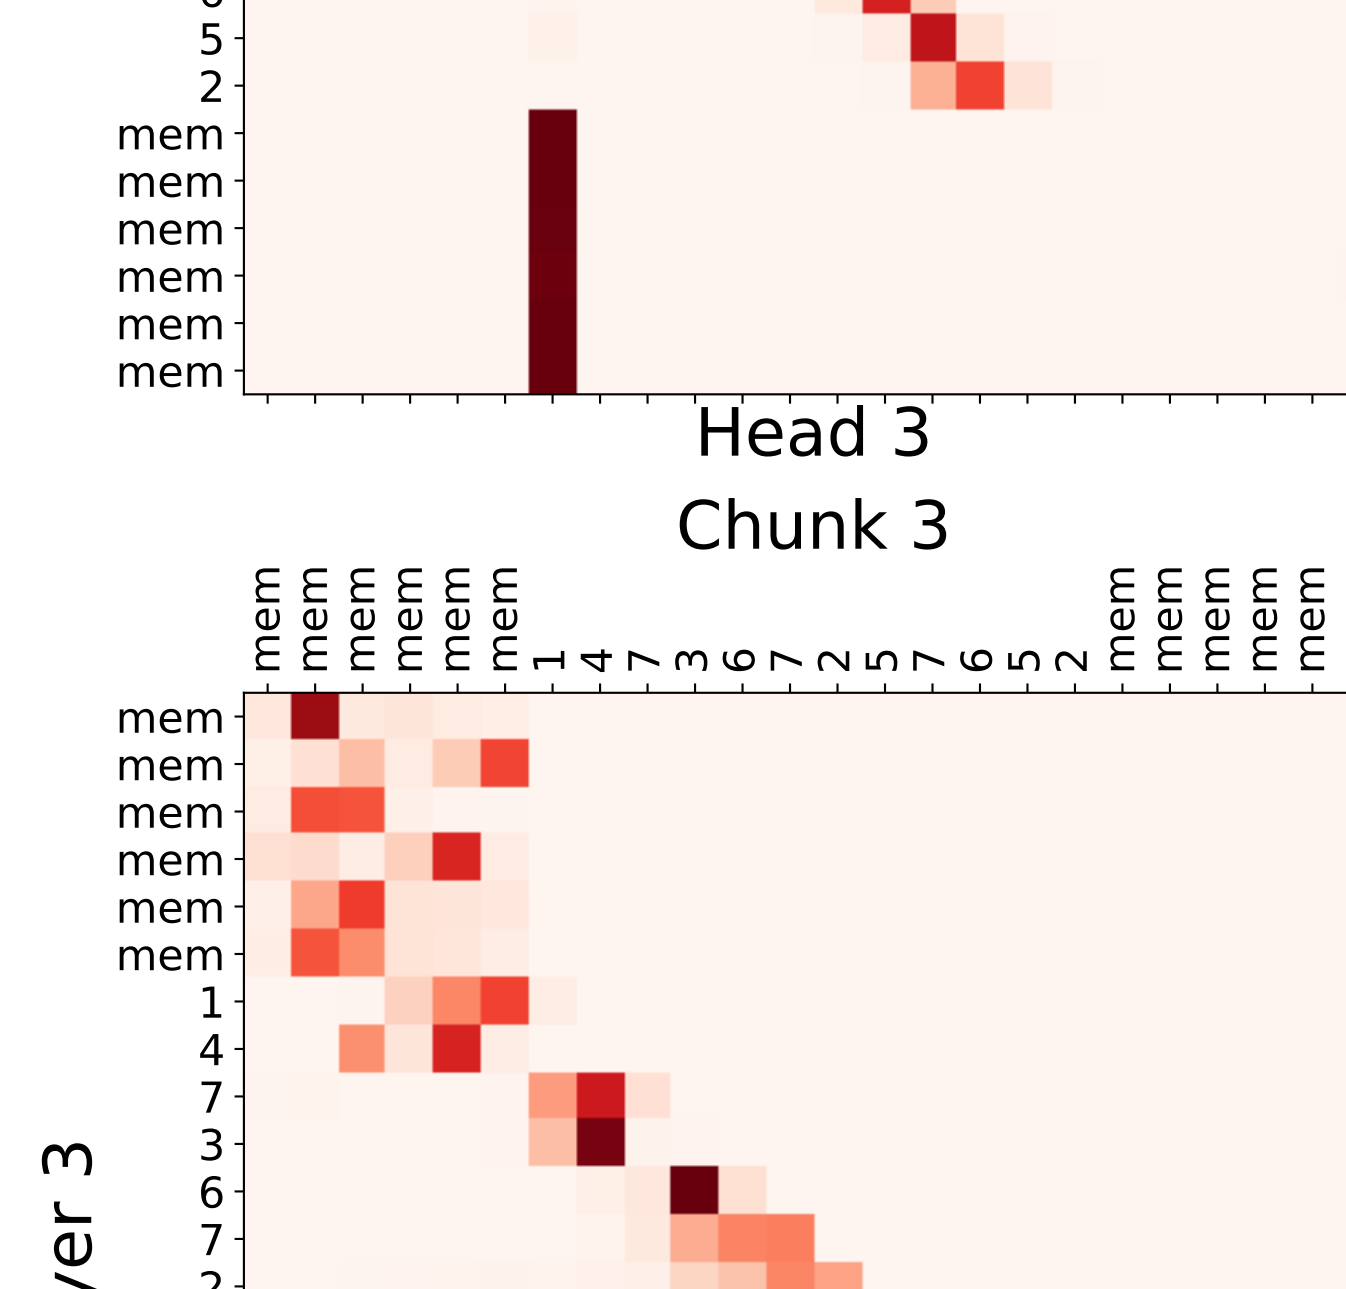

Head 3  
Chunk 3

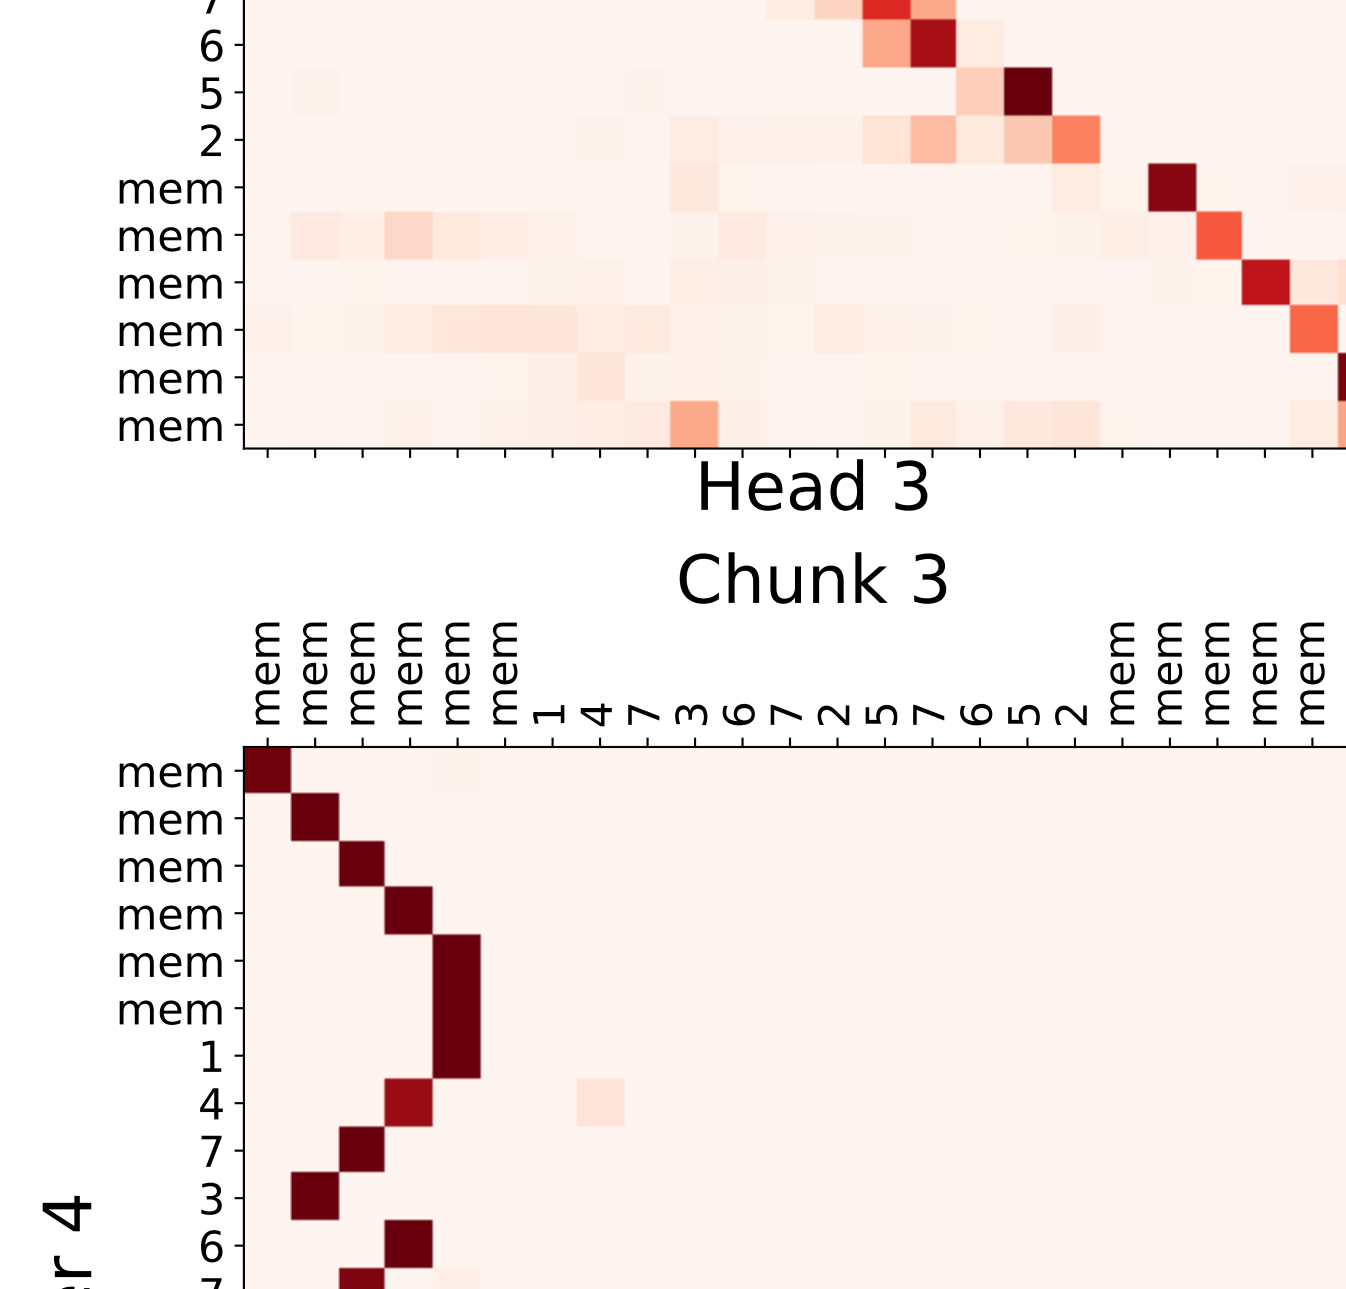

Head 3  
Chunk 4

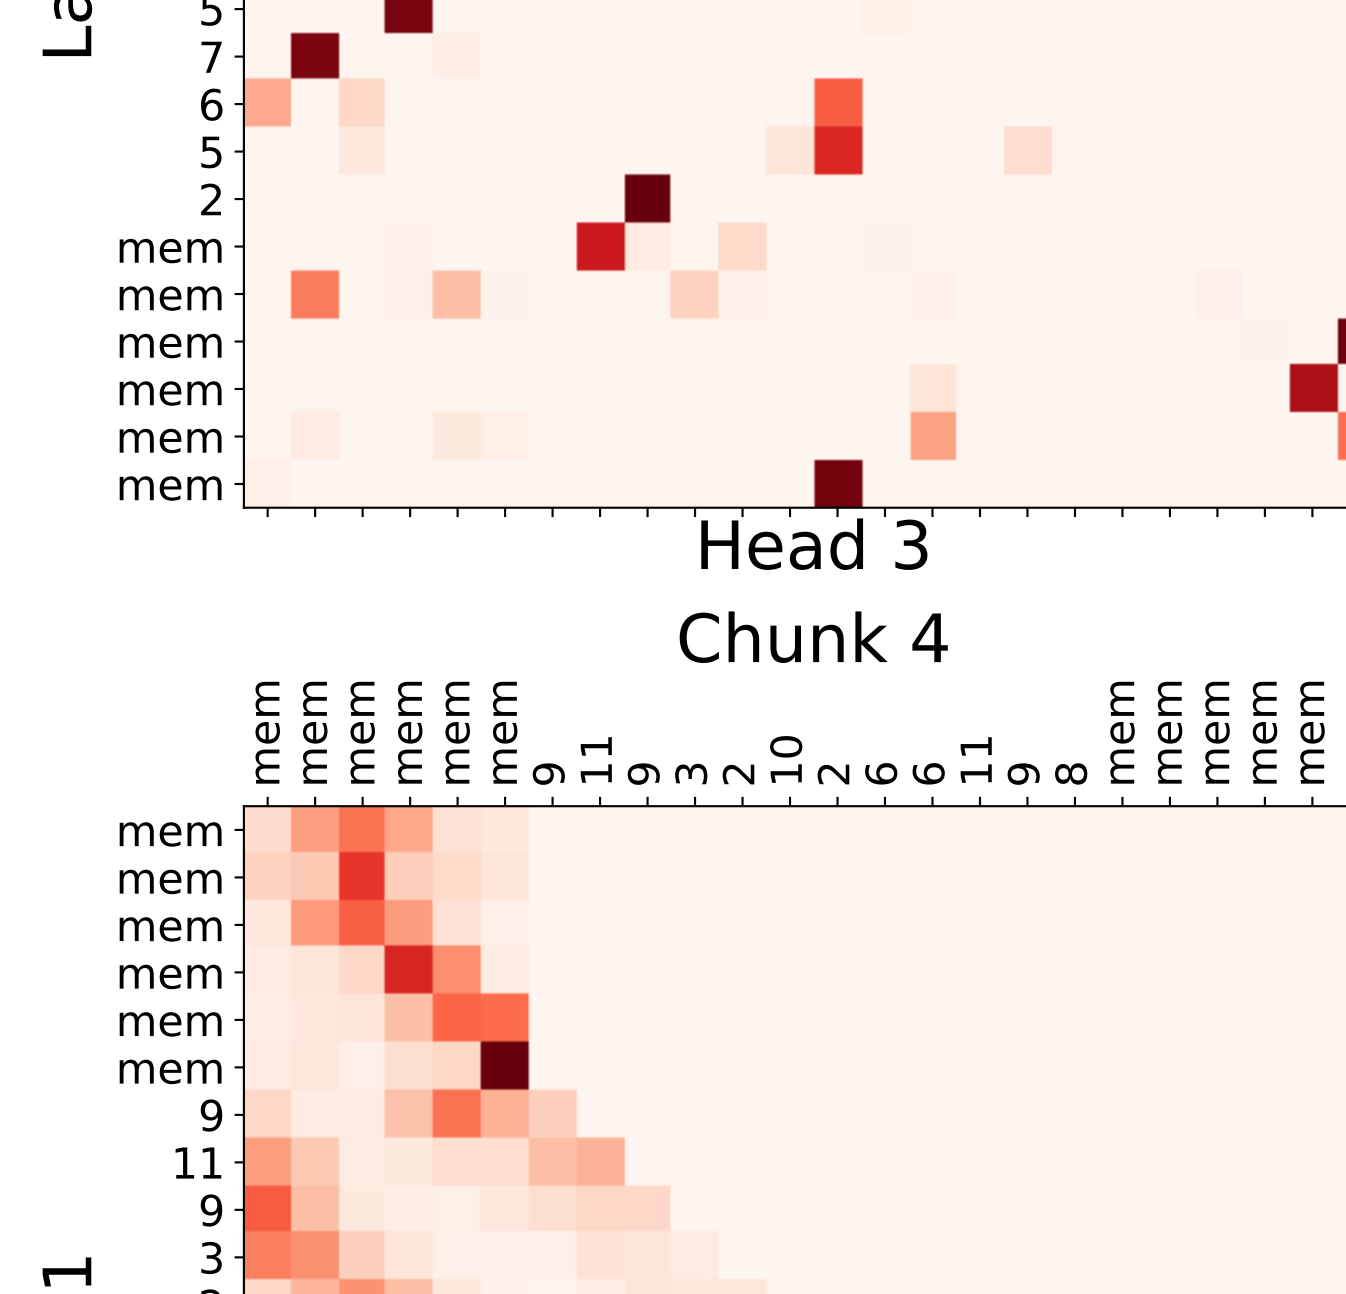

Head 3  
Chunk 4

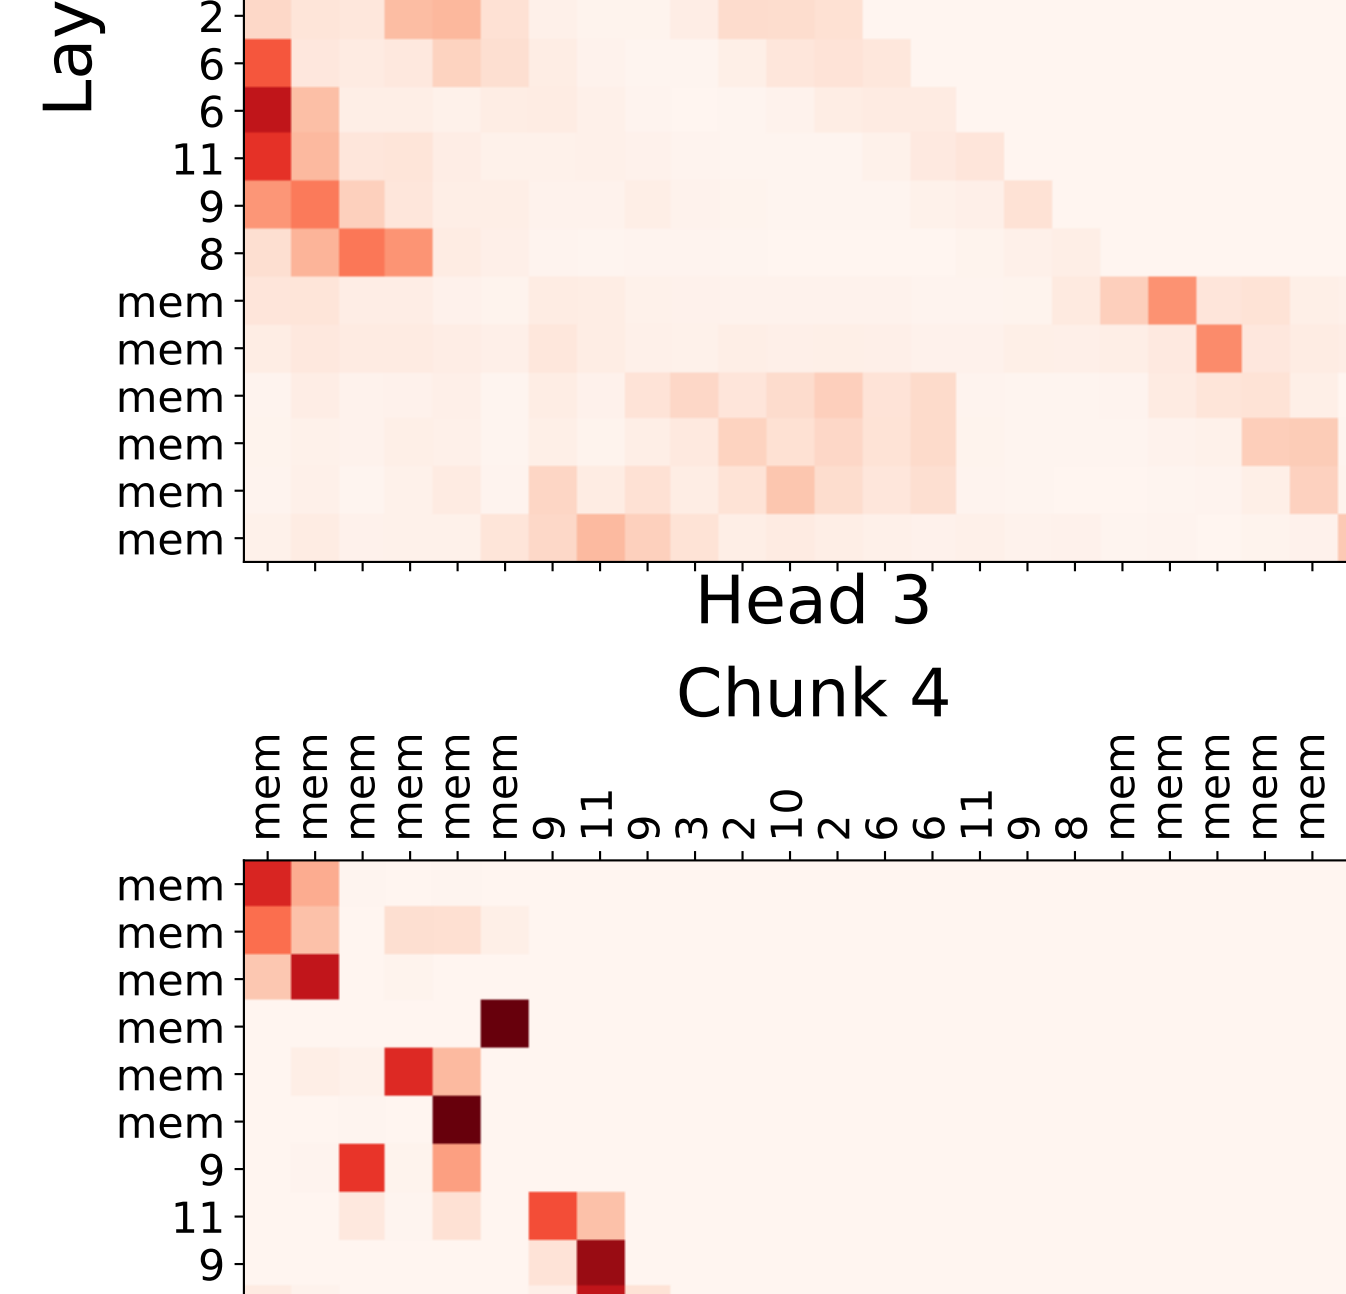

Head 3

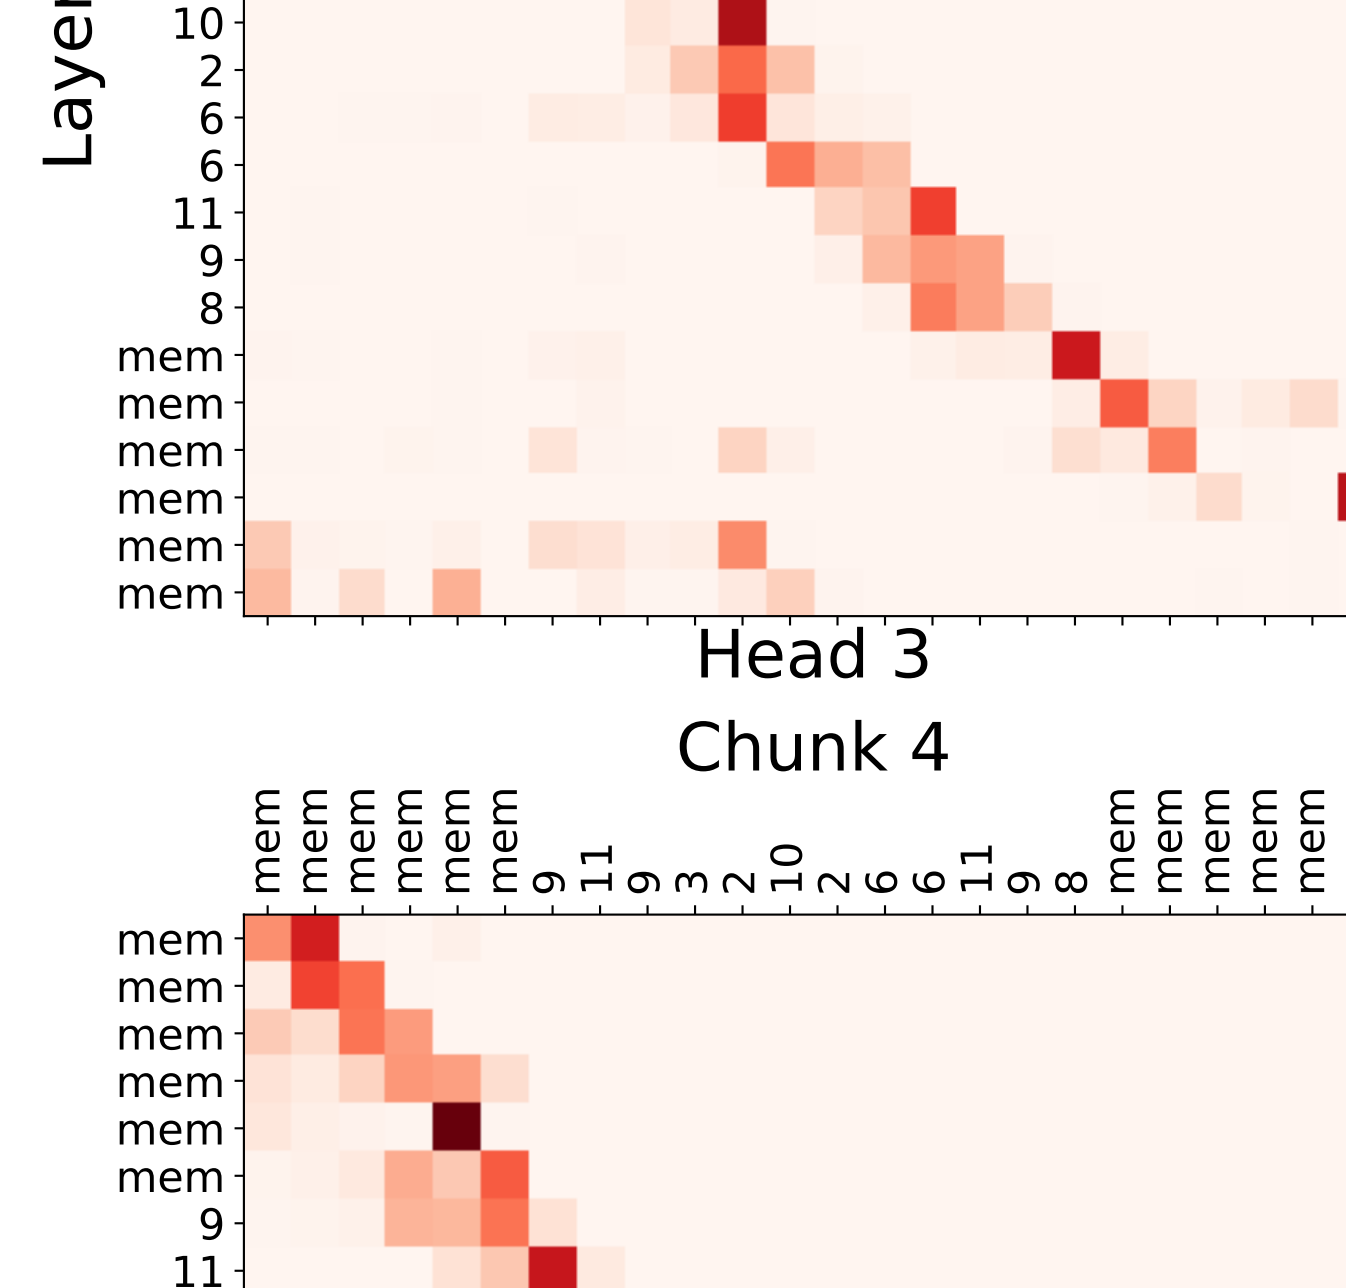

Head 4

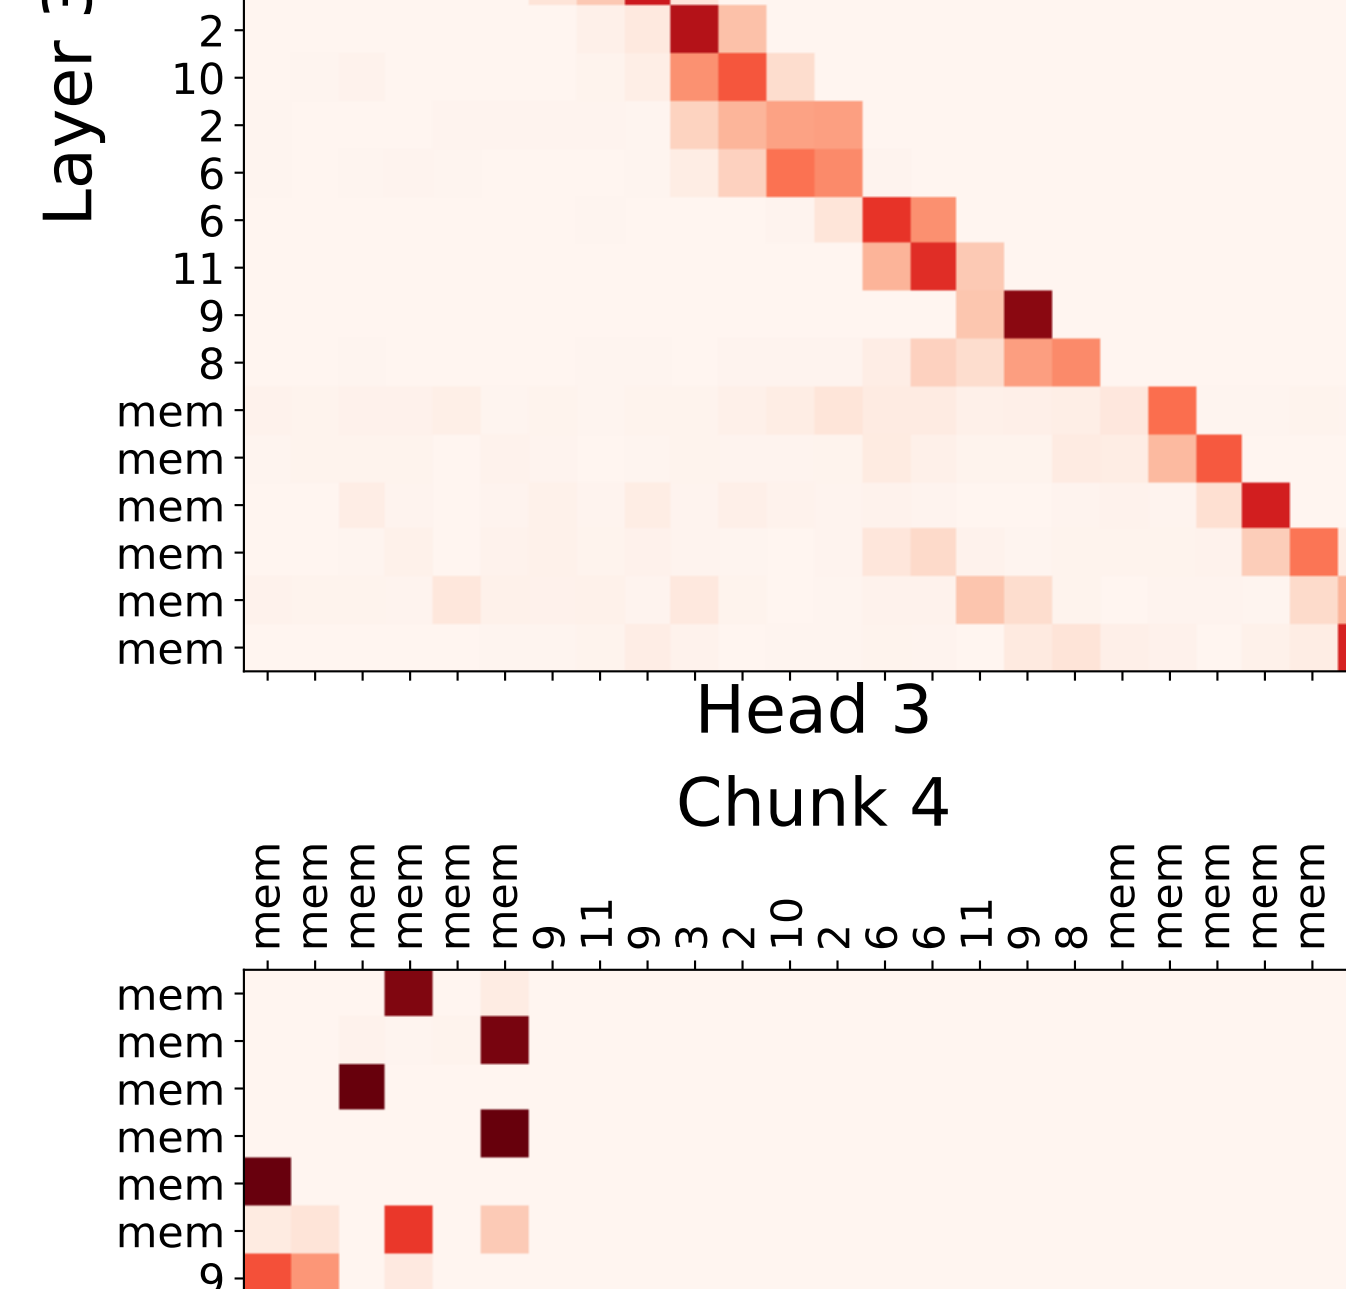

Head 4

Chunk 1

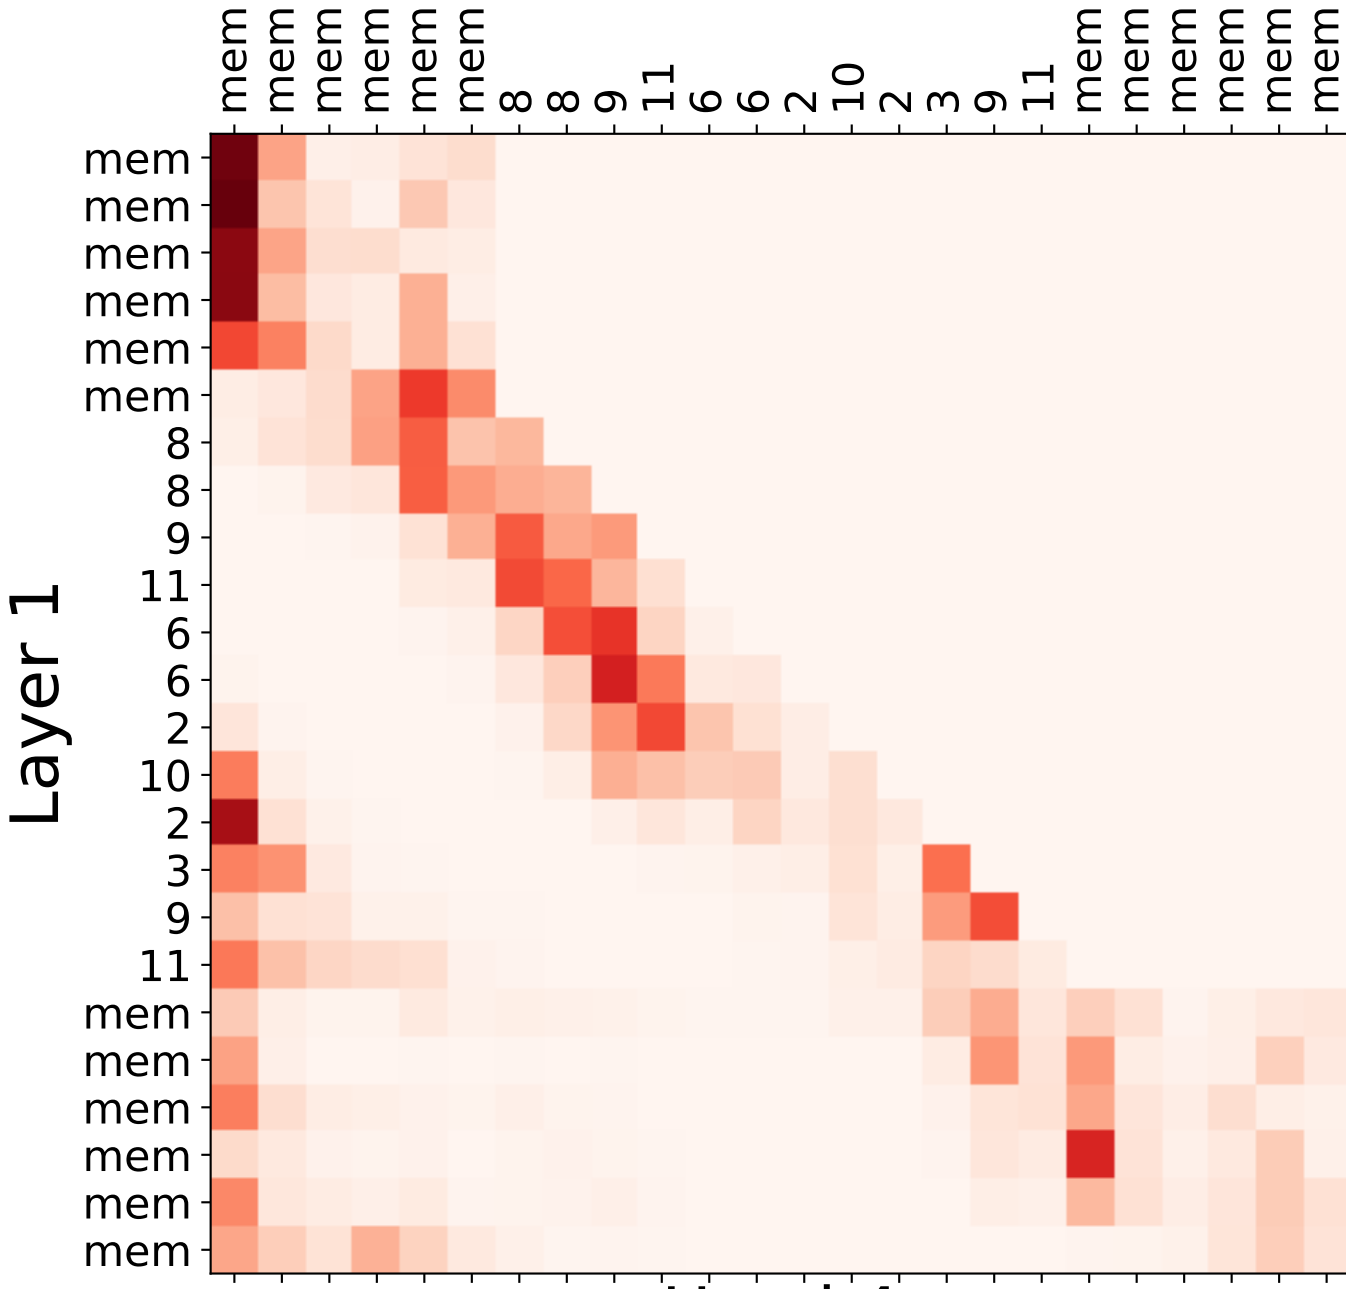

Head 4  
Chunk 1

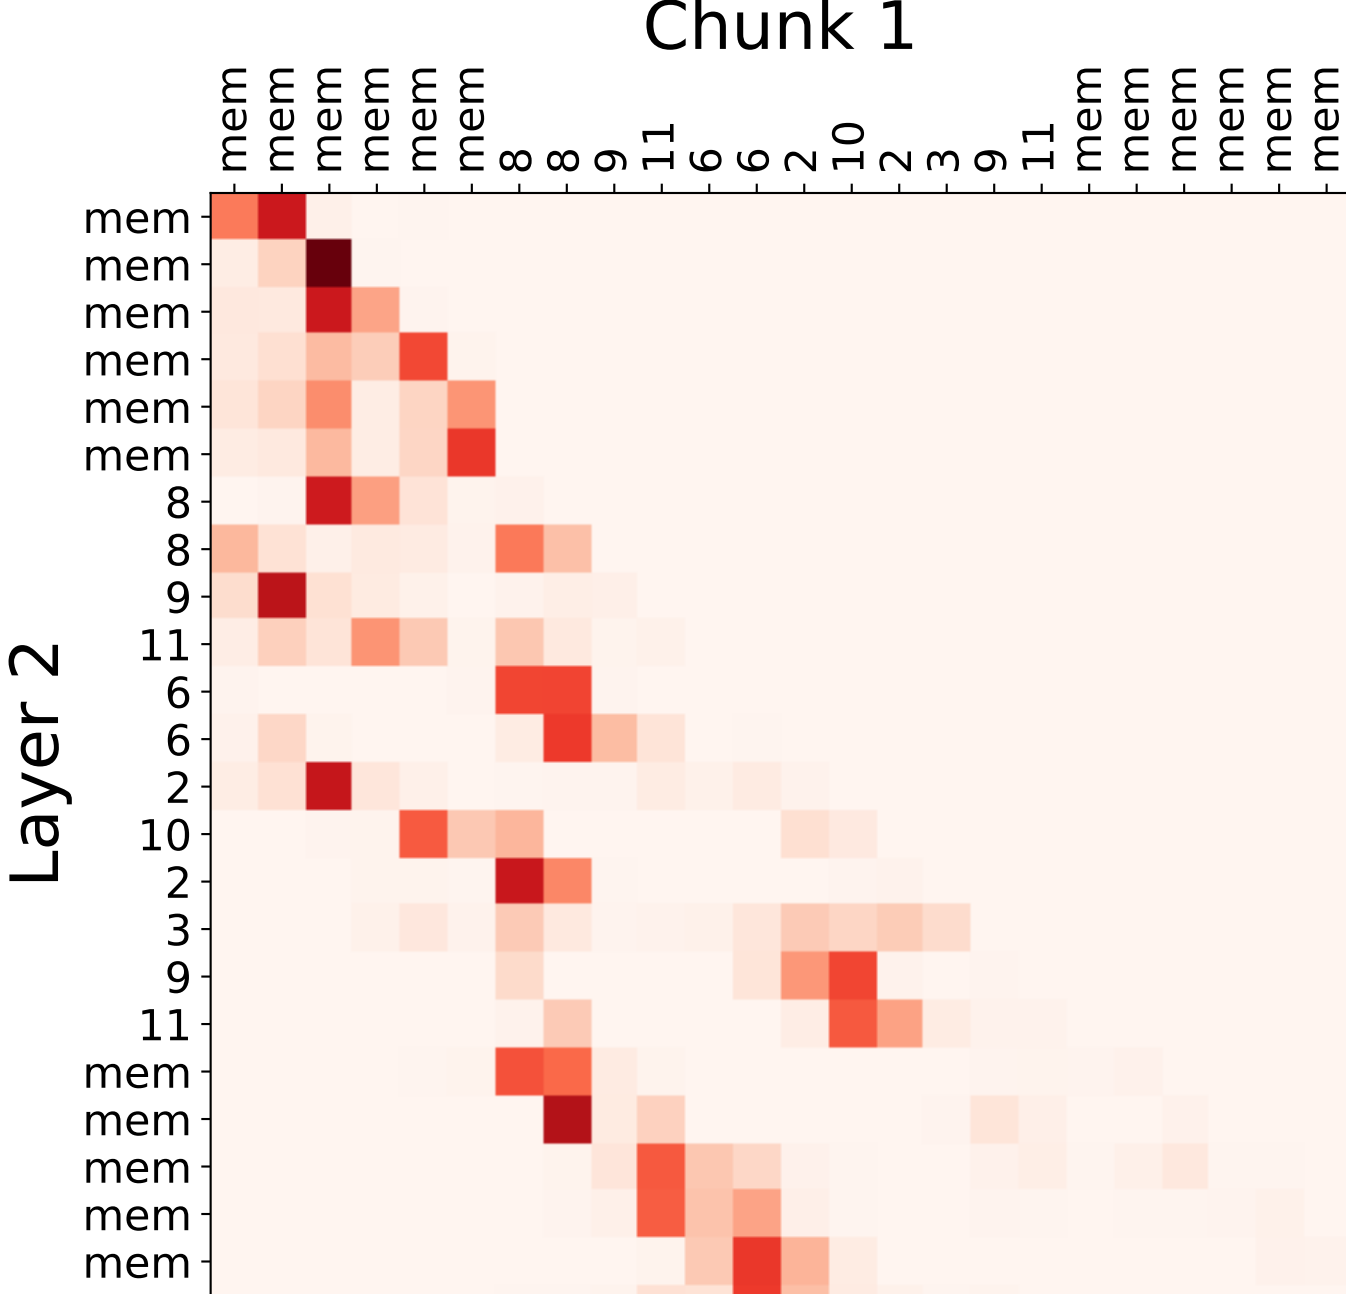

Head 4  
Chunk 1

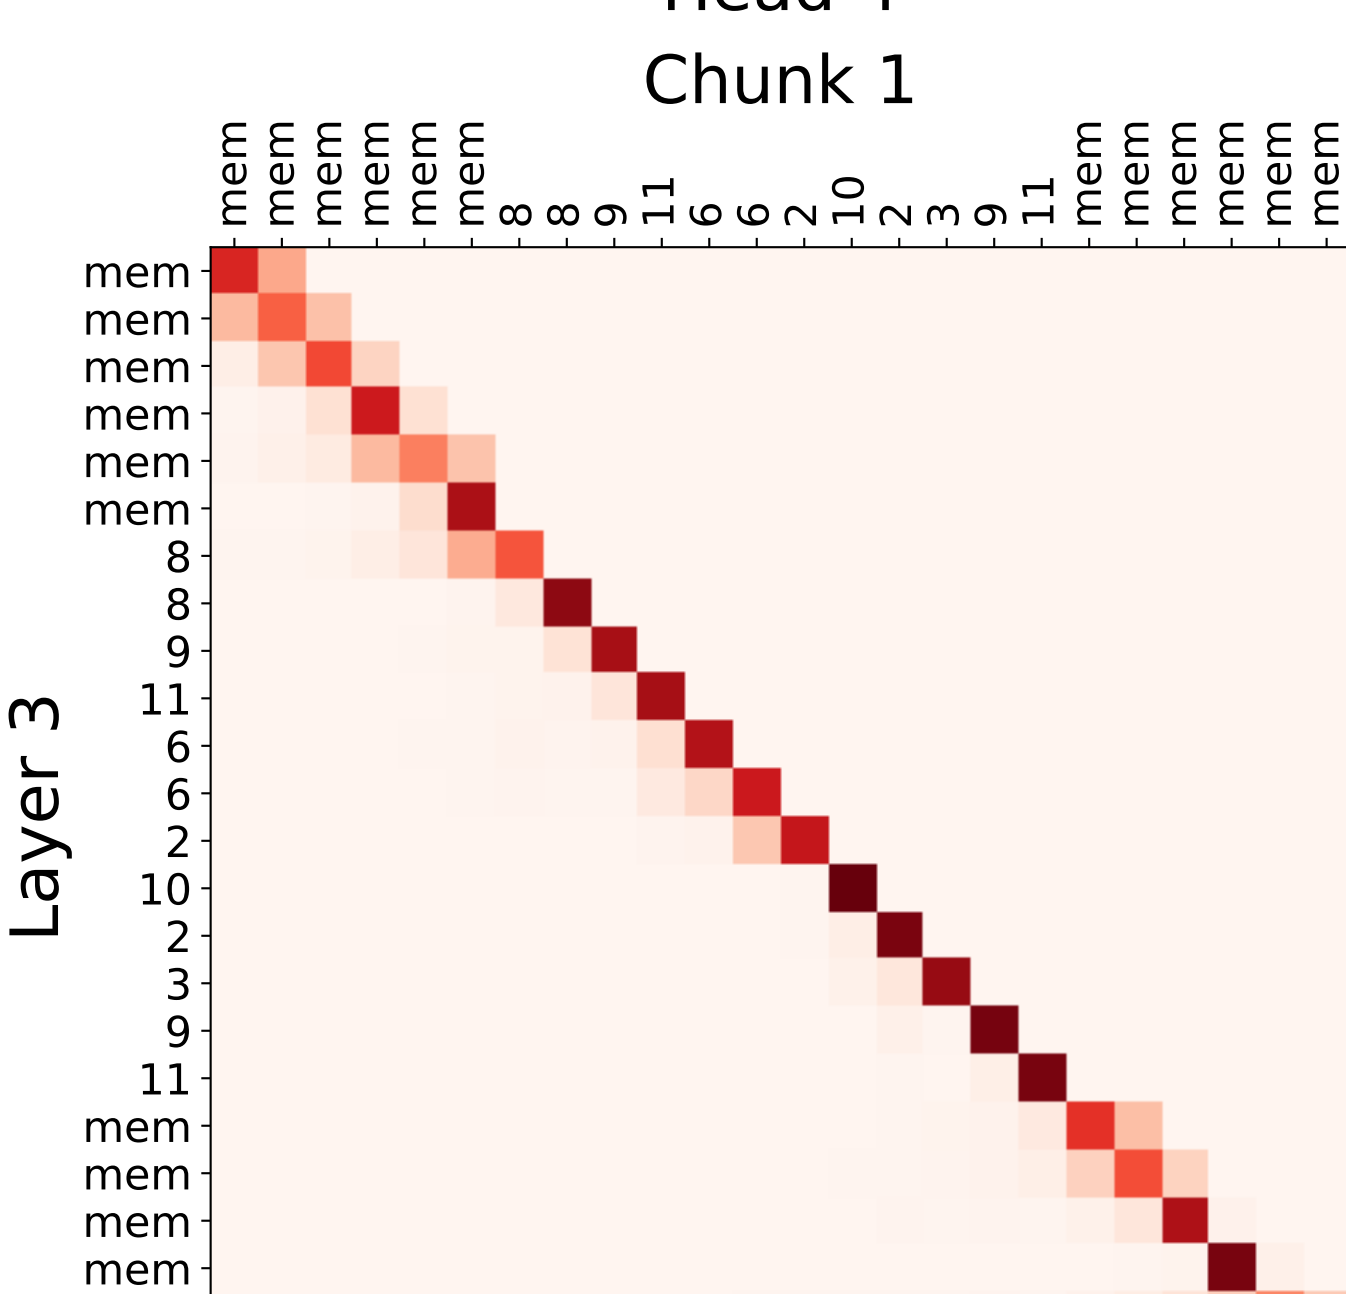

Head 4  
Chunk 1

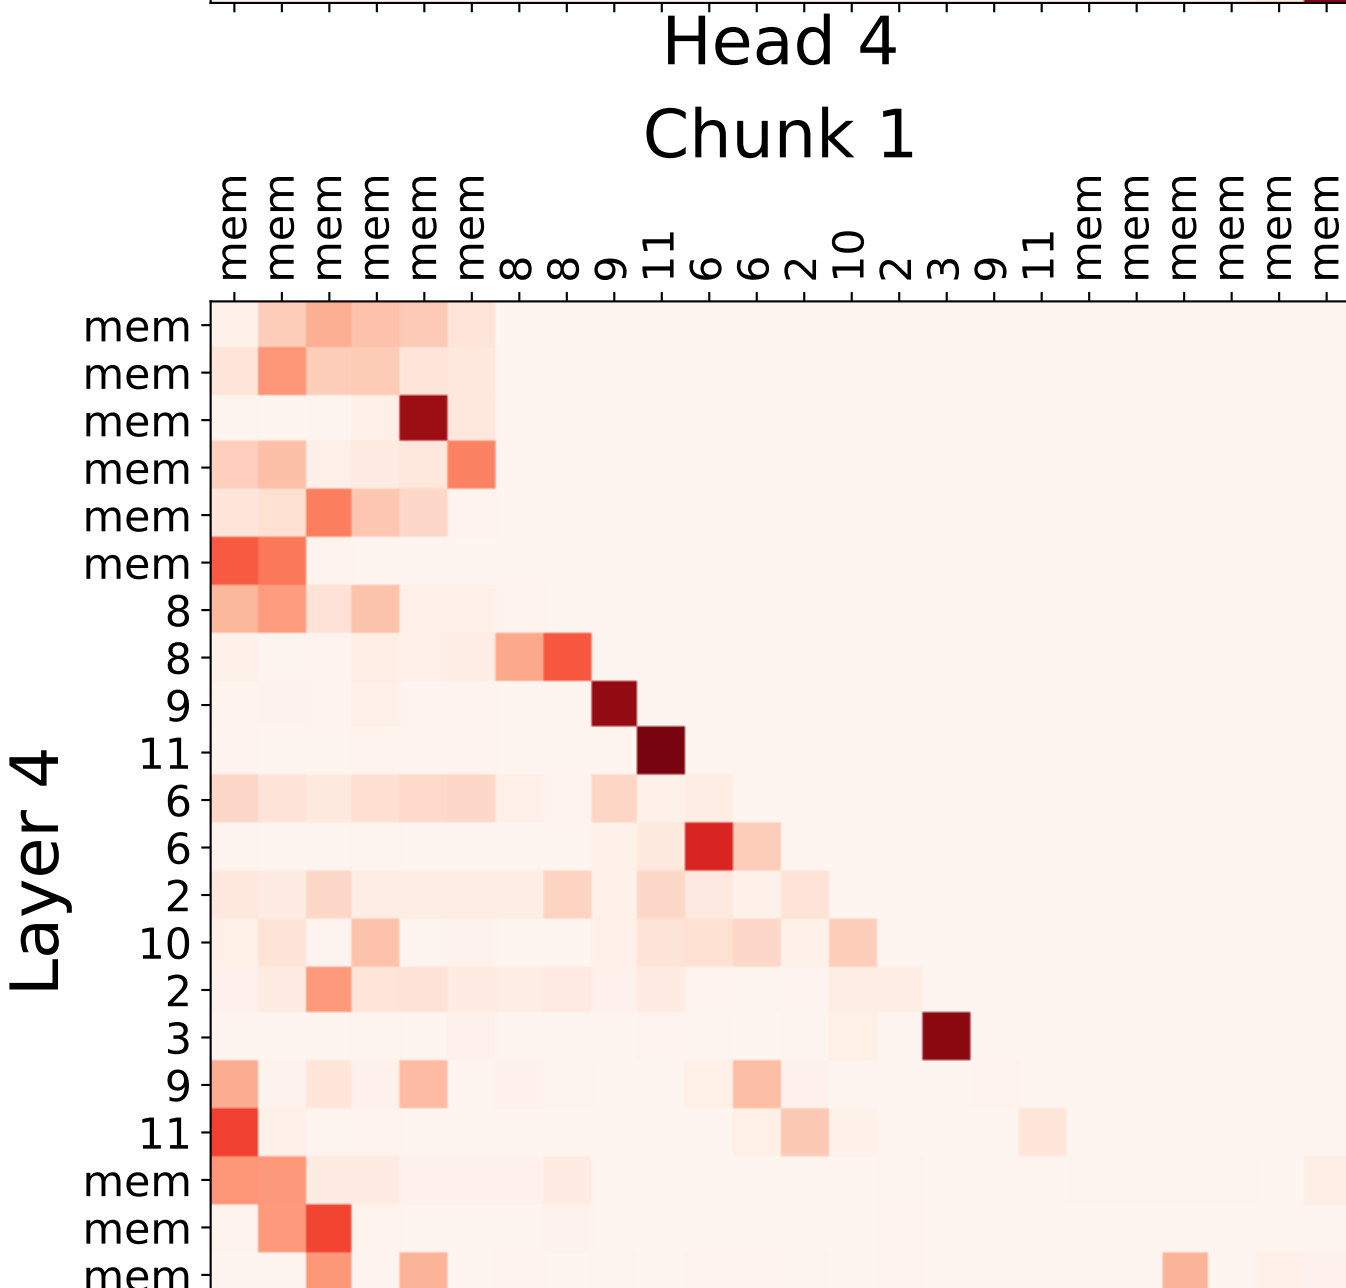

Head 4  
Chunk 2

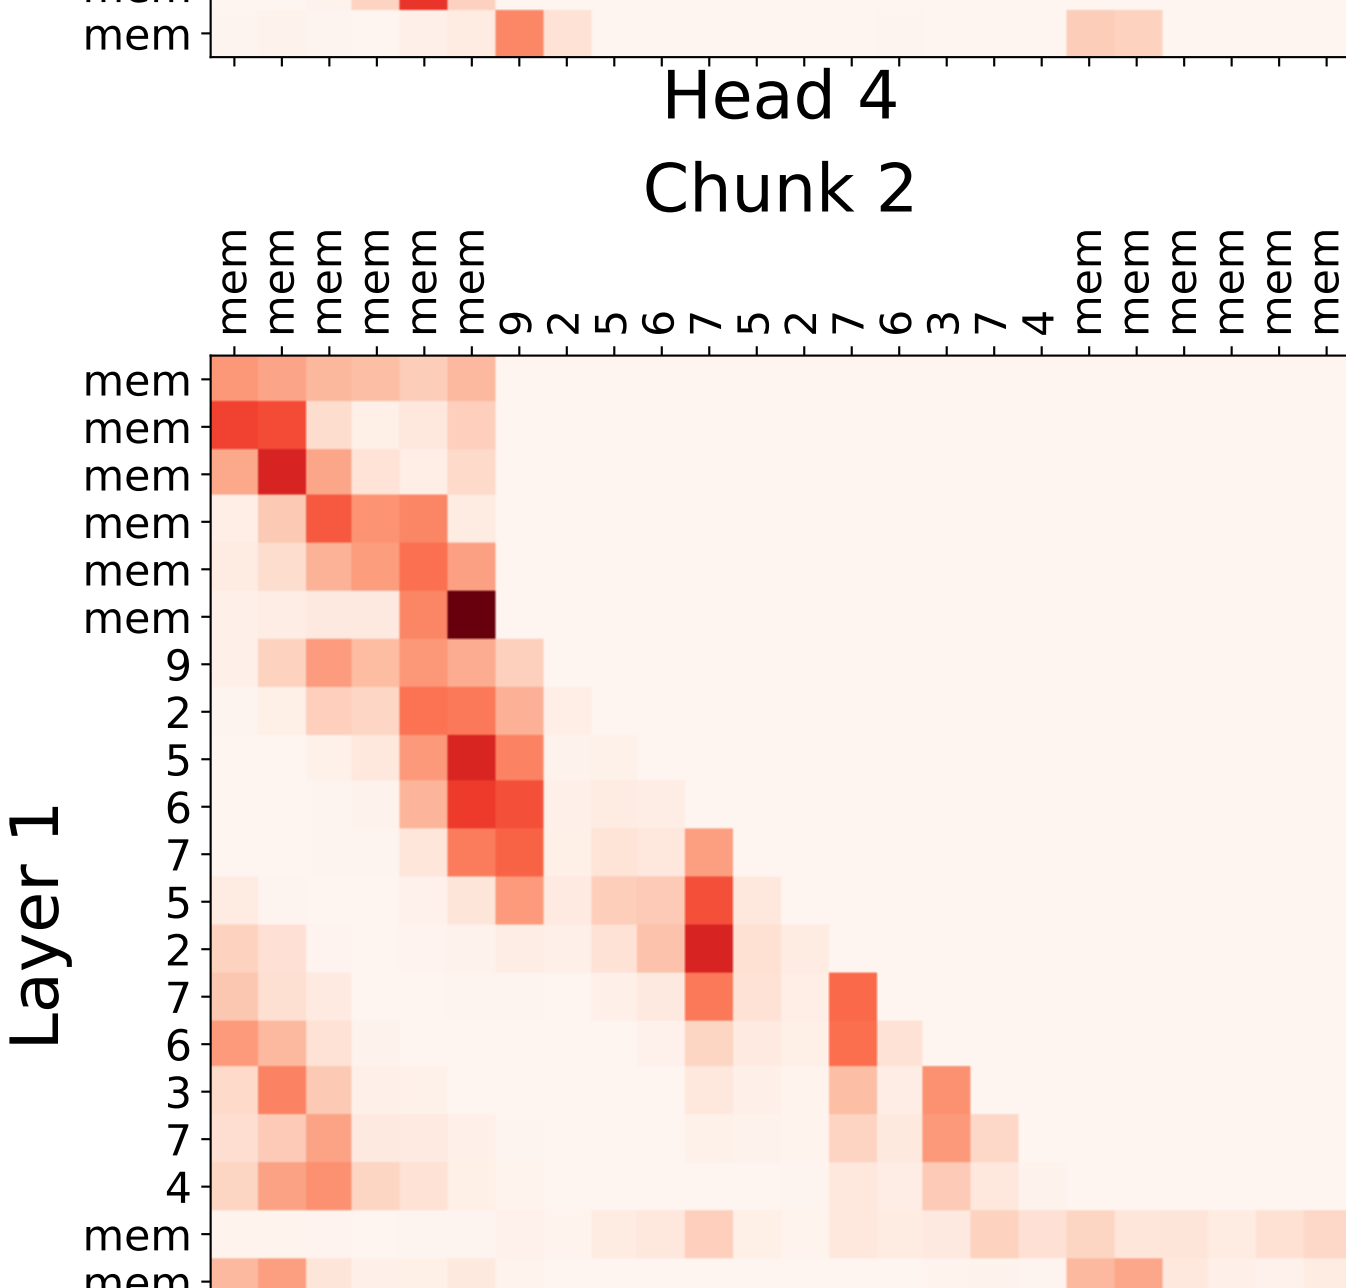

Head 4  
Chunk 2

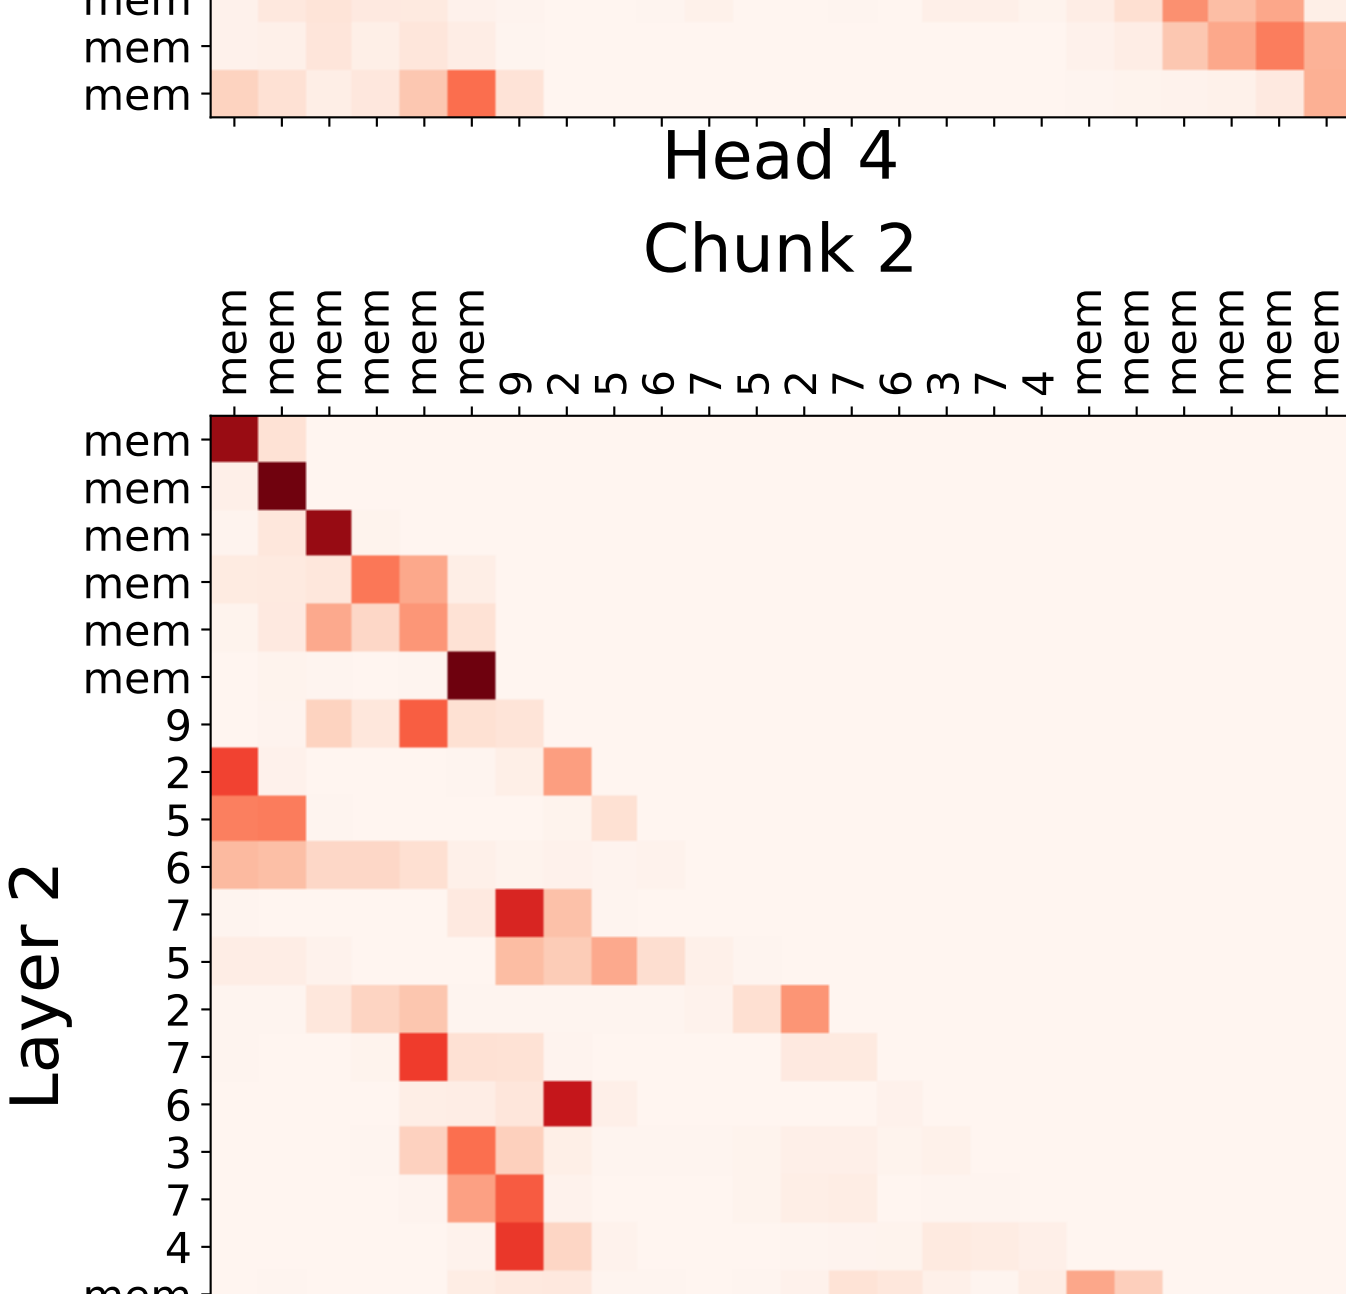

Head 4  
Chunk 2

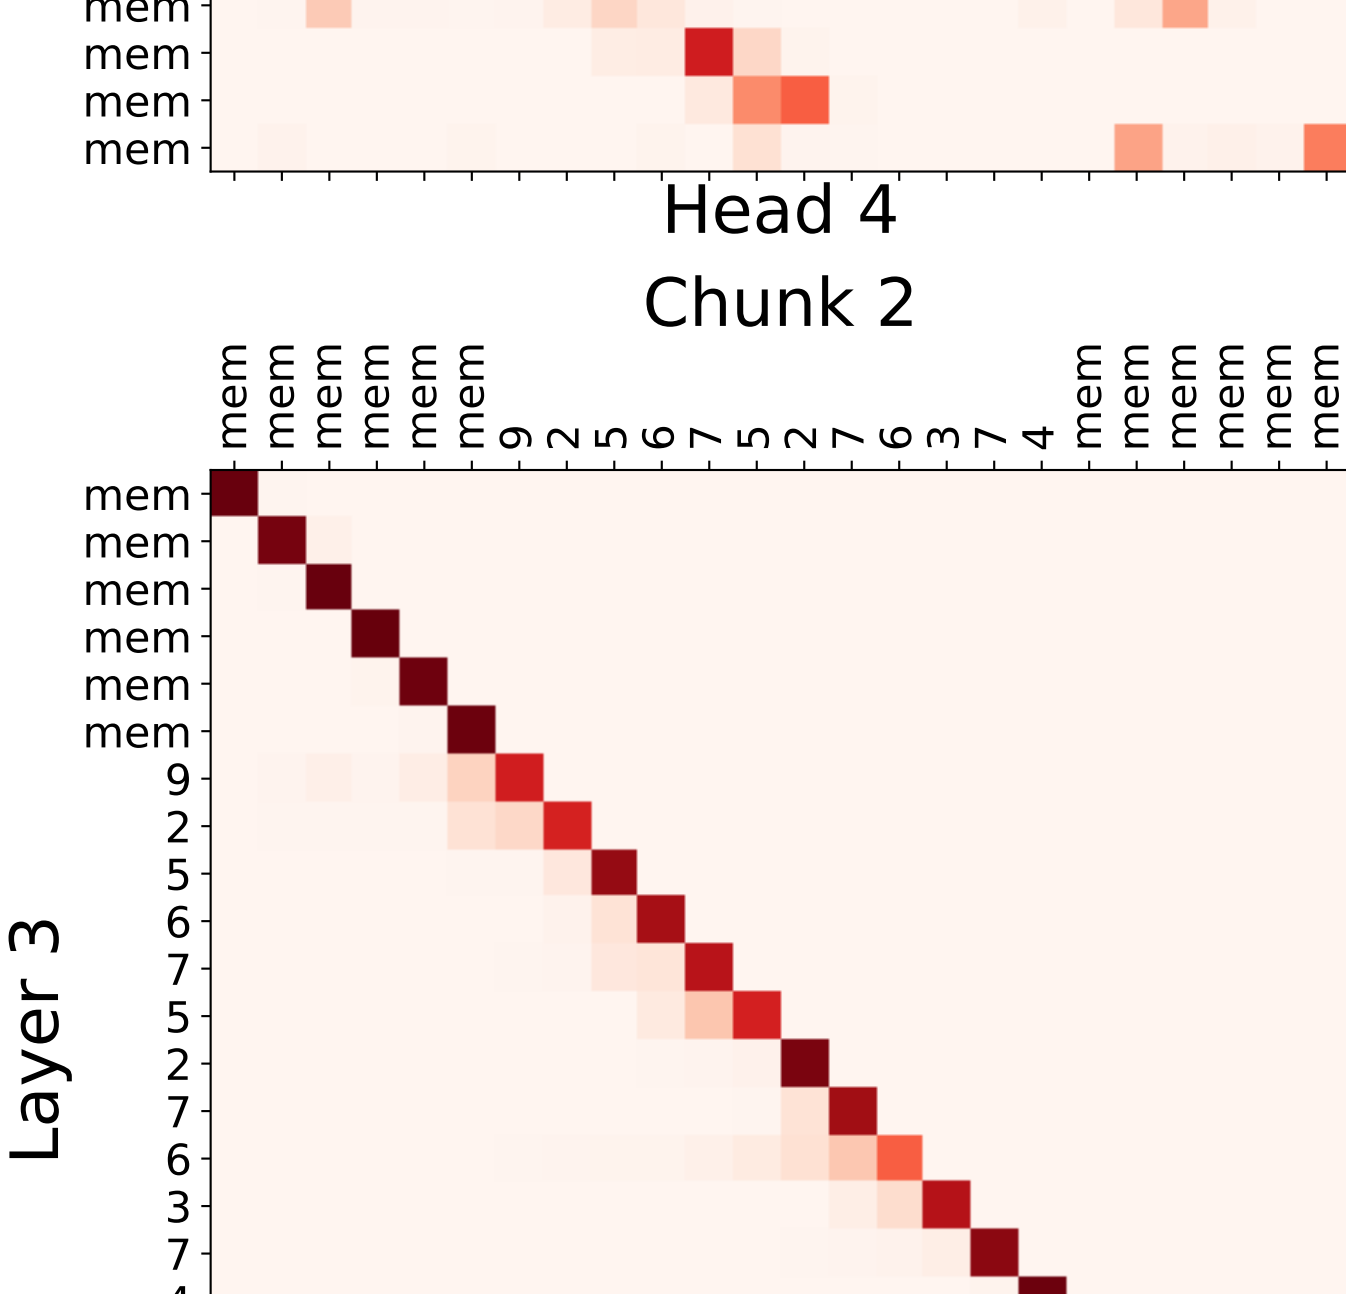

Head 4  
Chunk 2

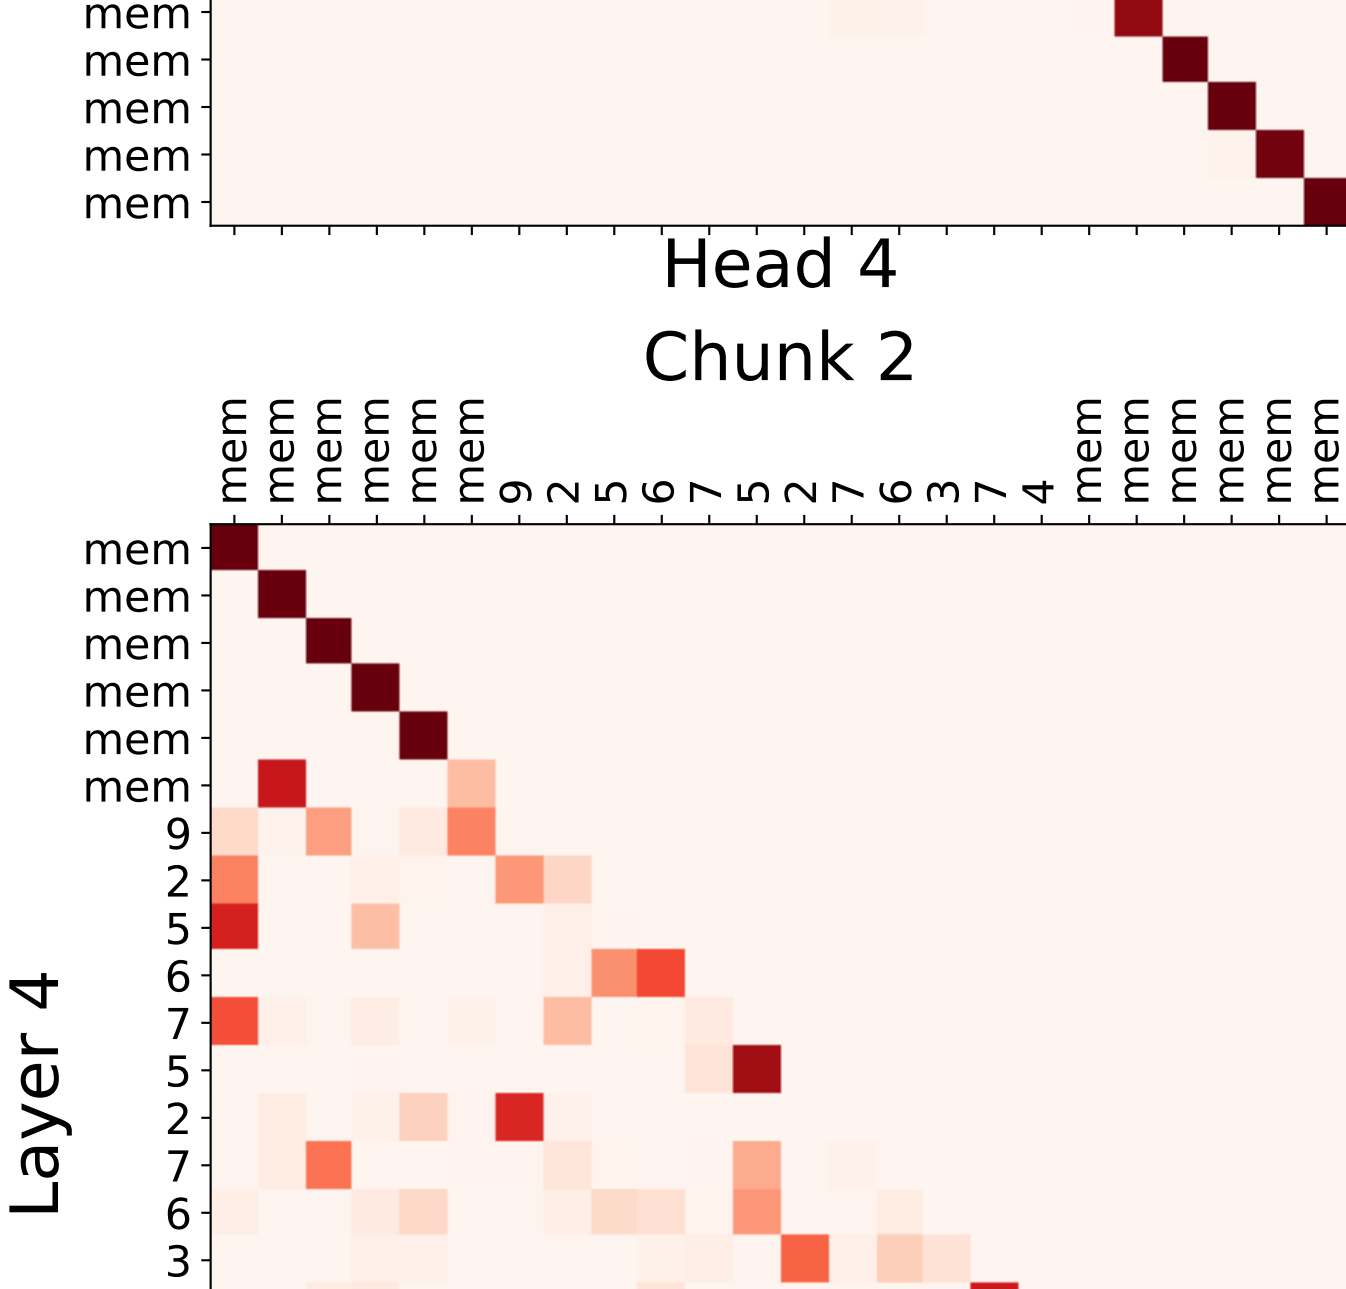

Head 4  
Chunk 3

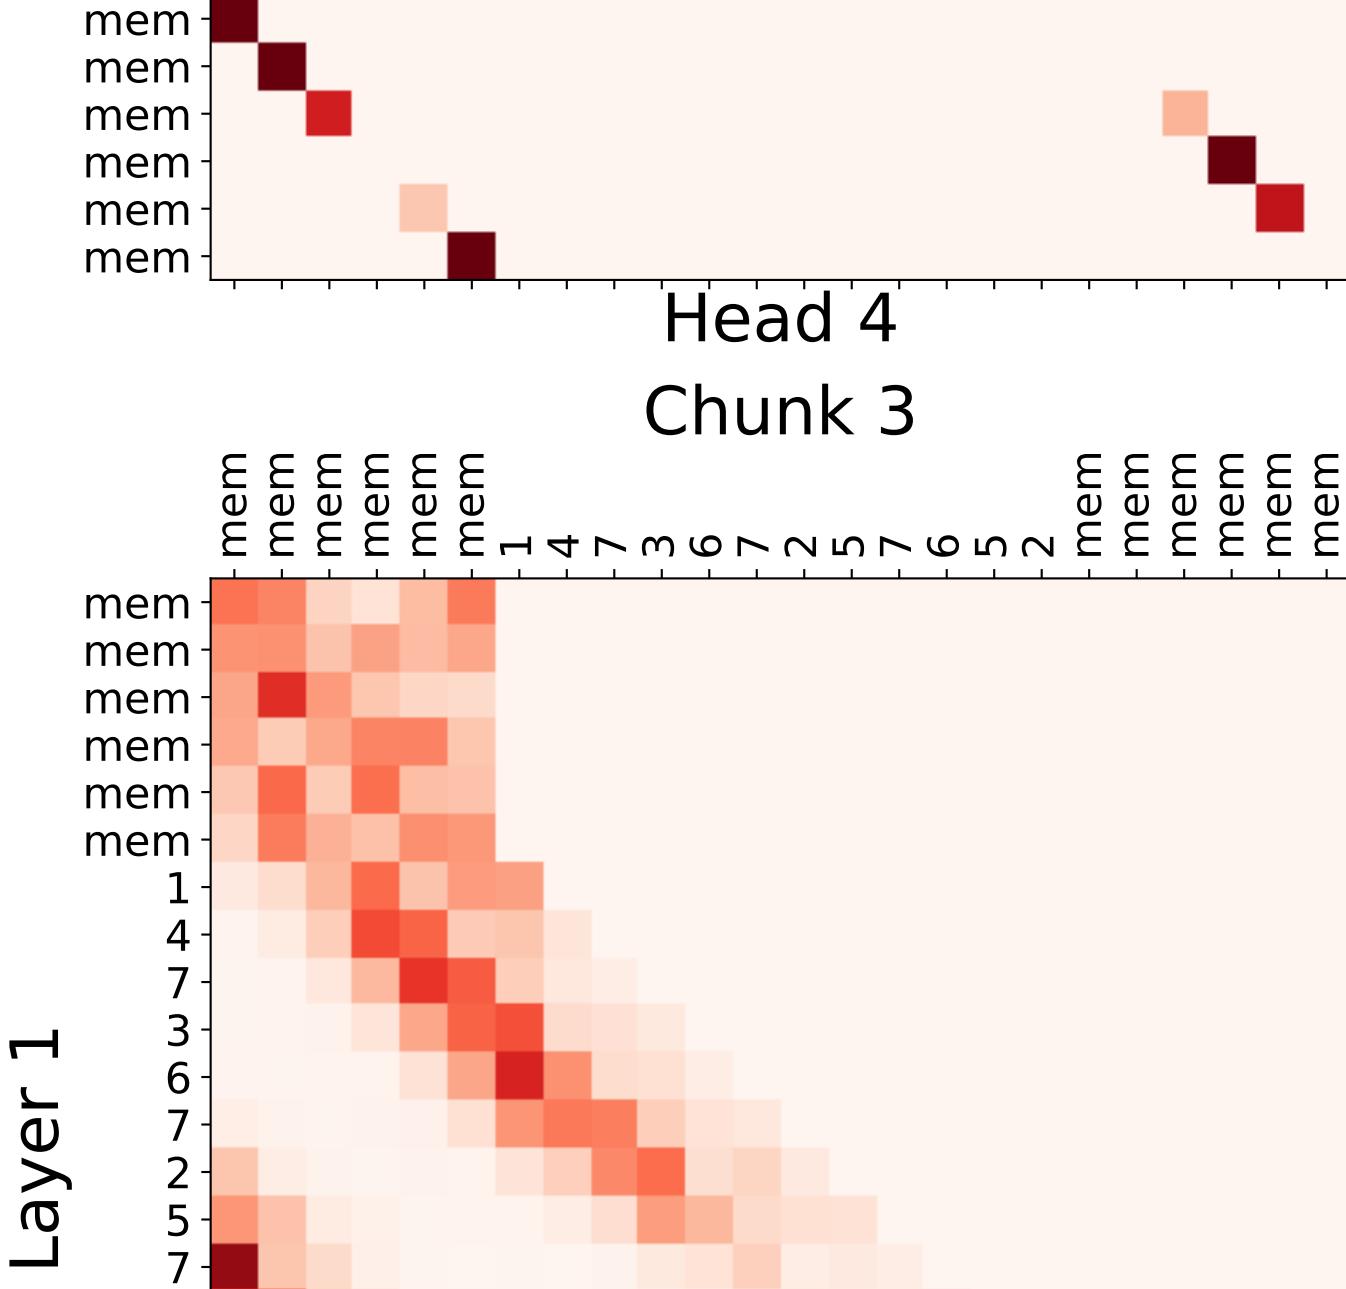

Head 4  
Chunk 3

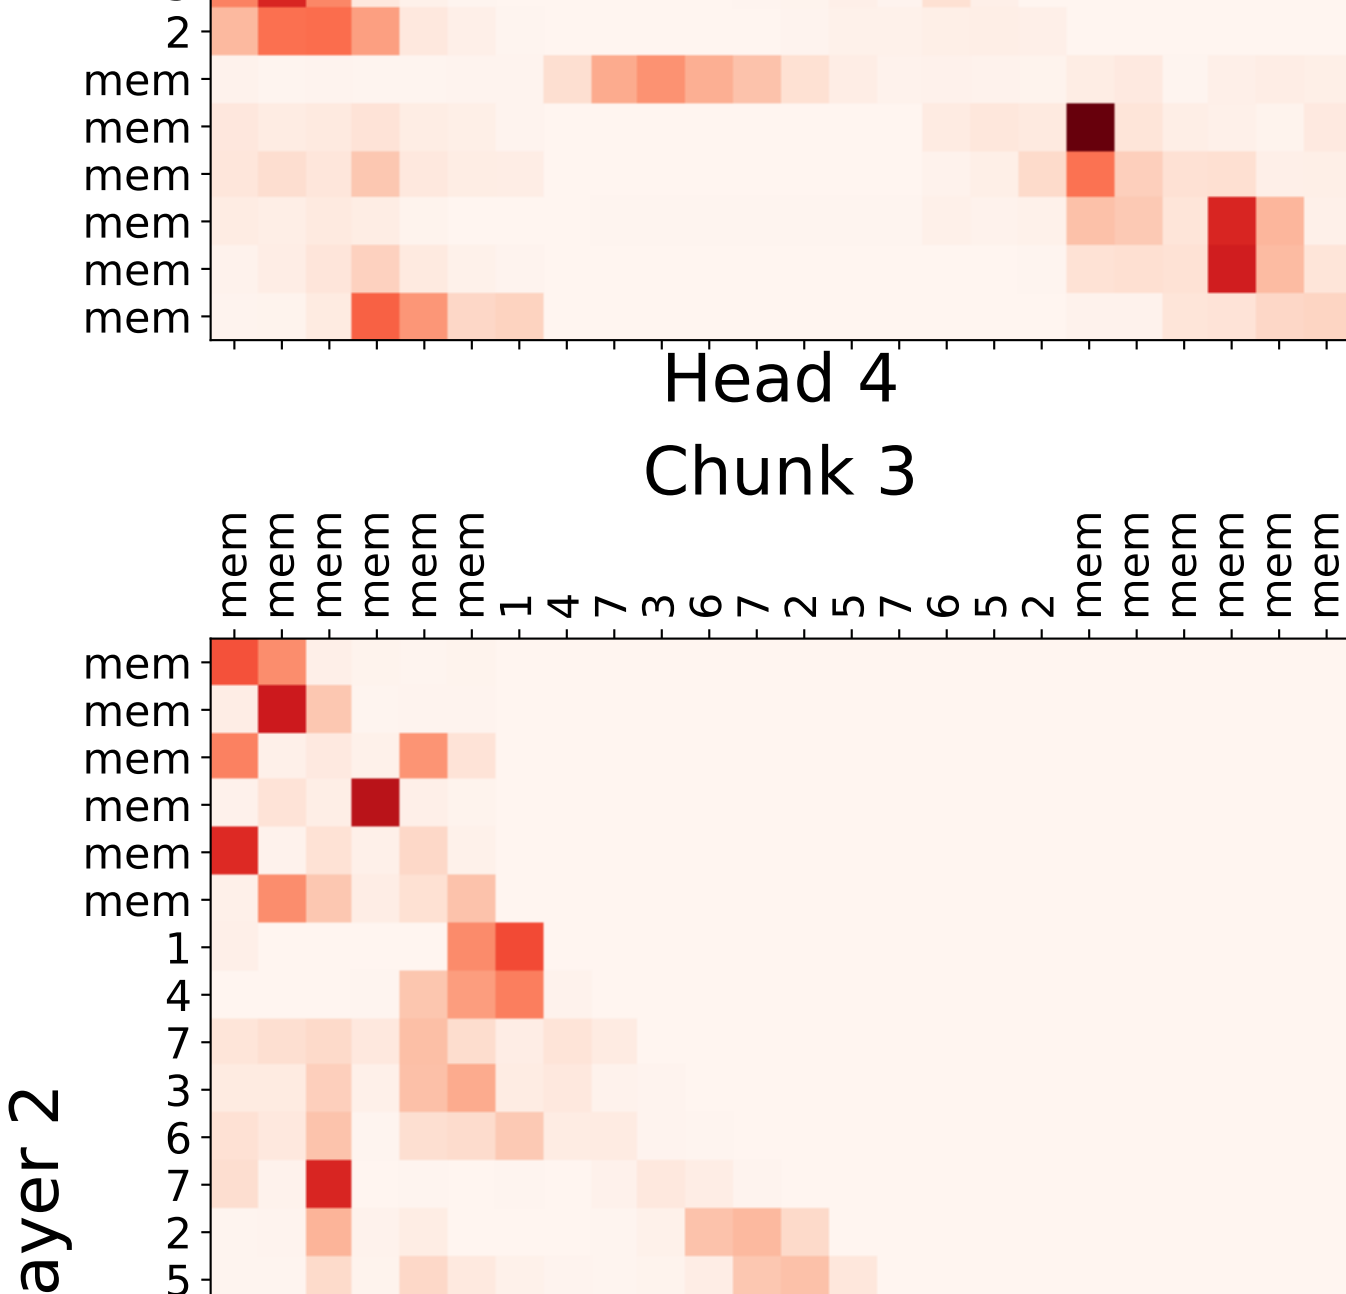

Head 4  
Chunk 3

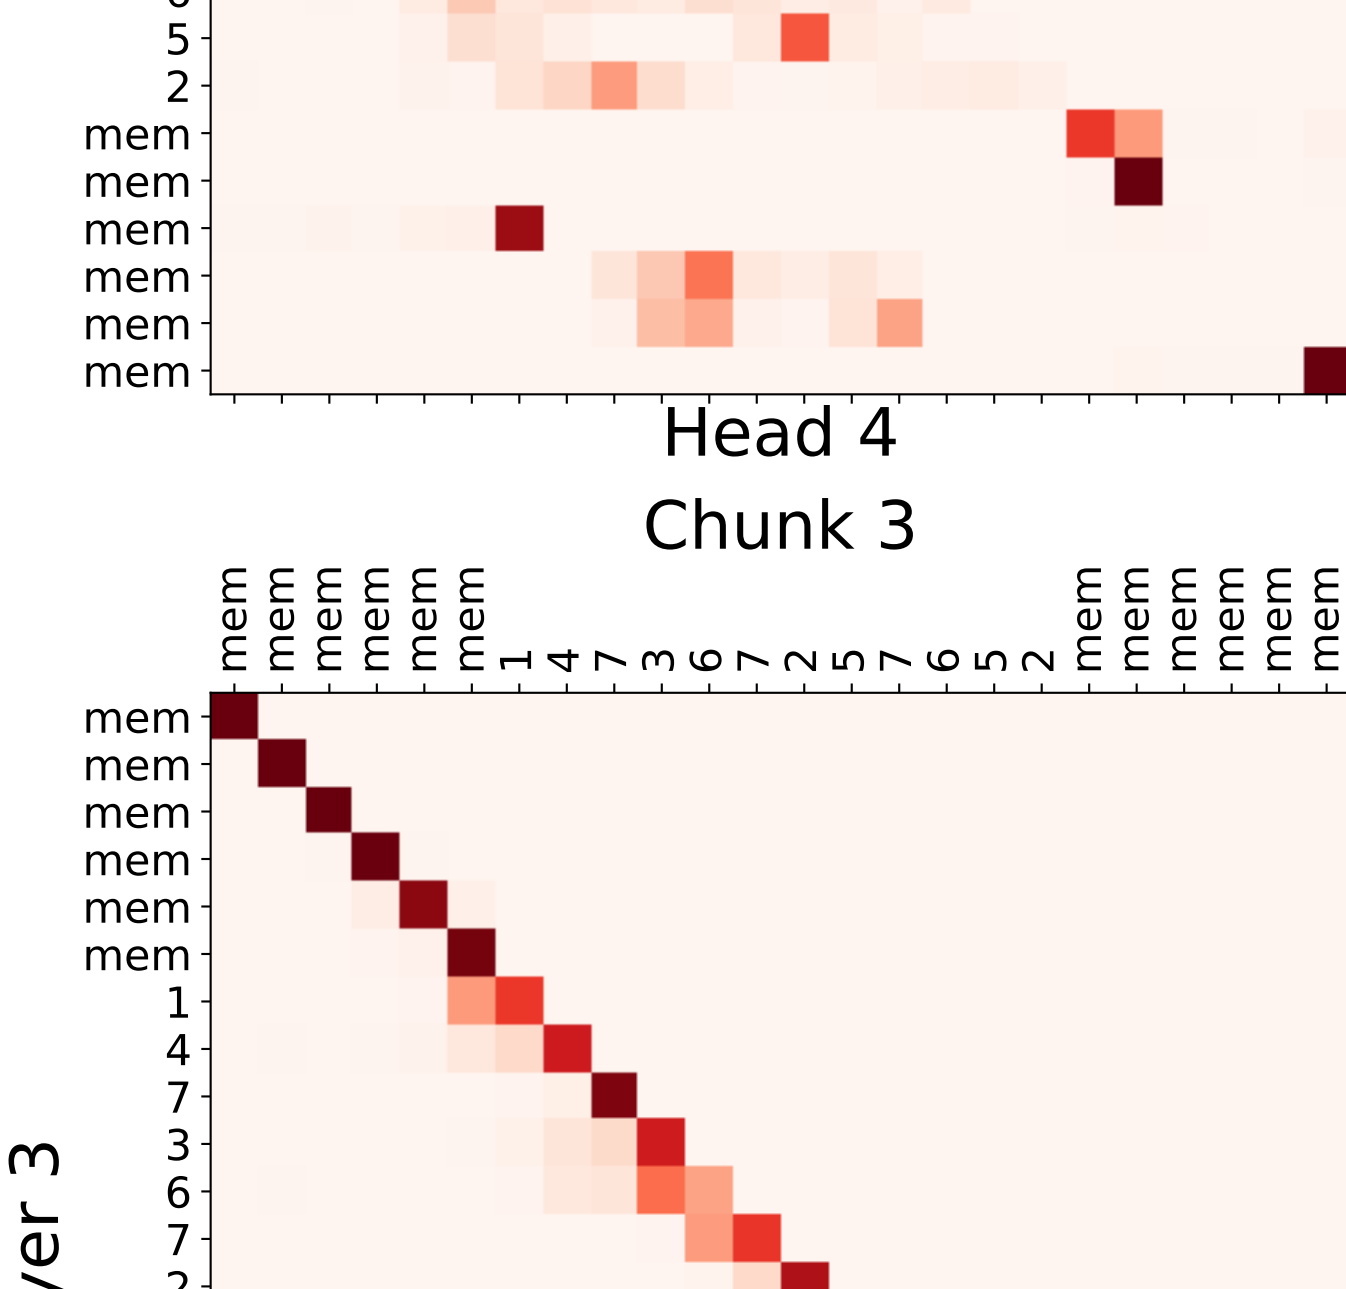

Head 4  
Chunk 3

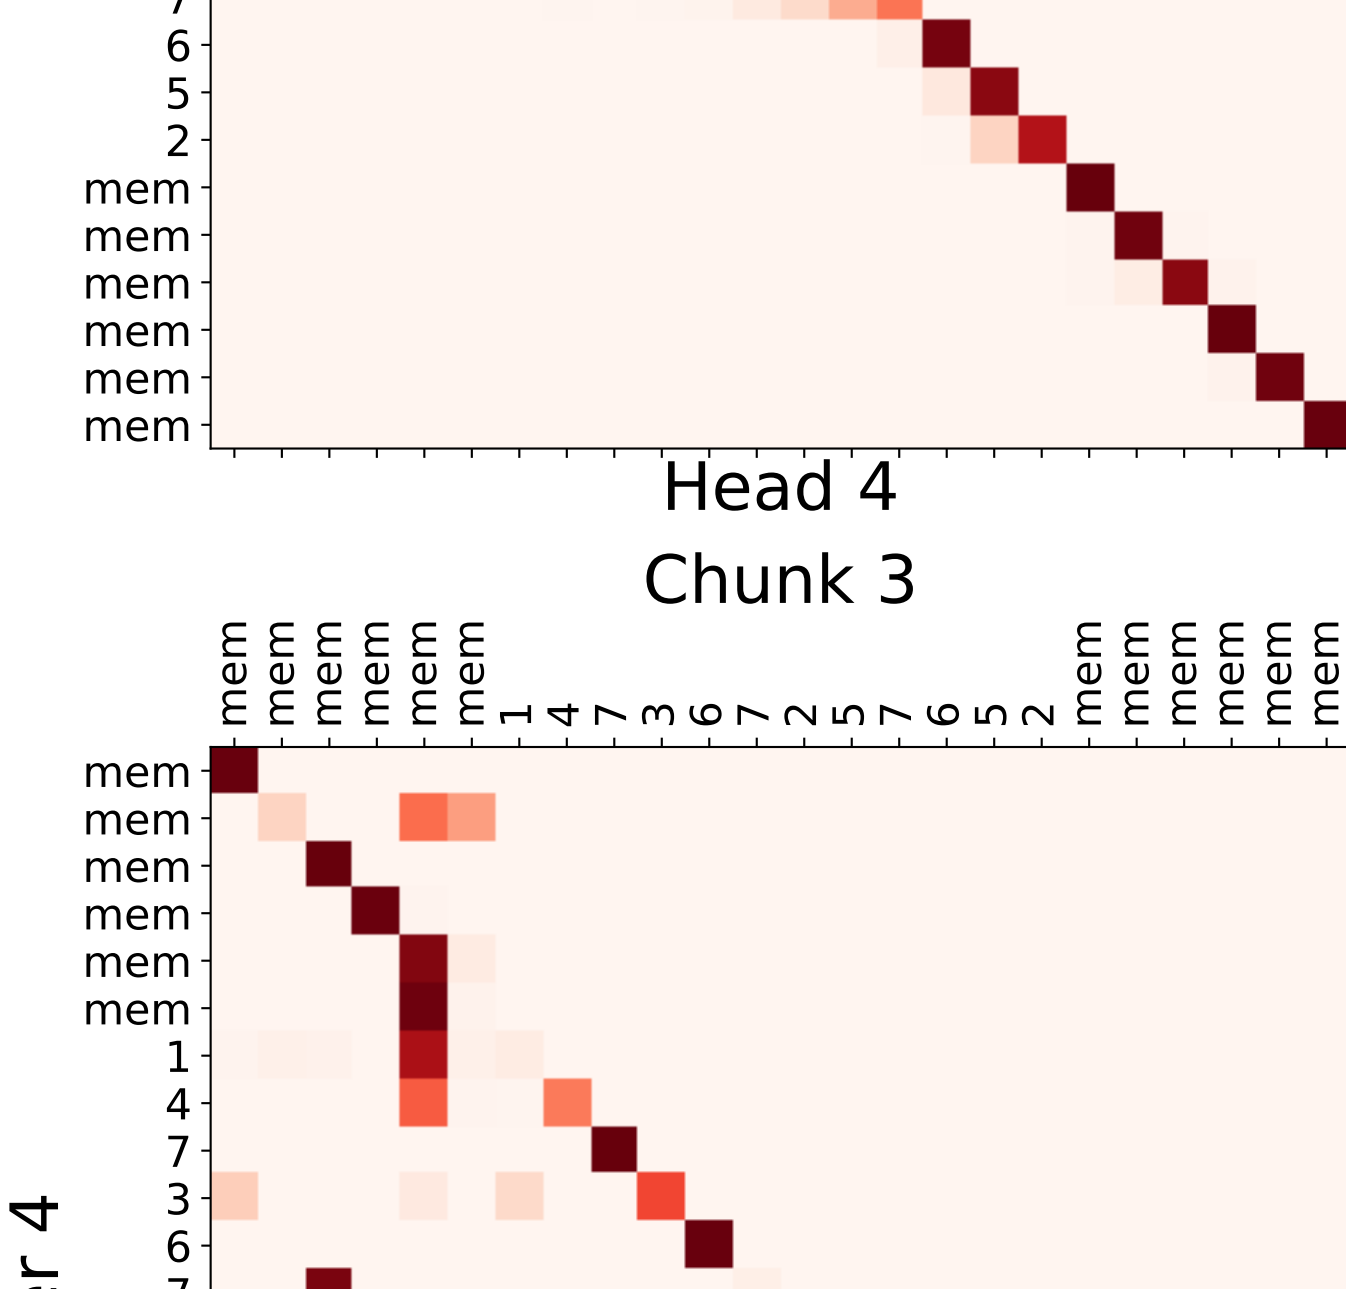

Head 4  
Chunk 4

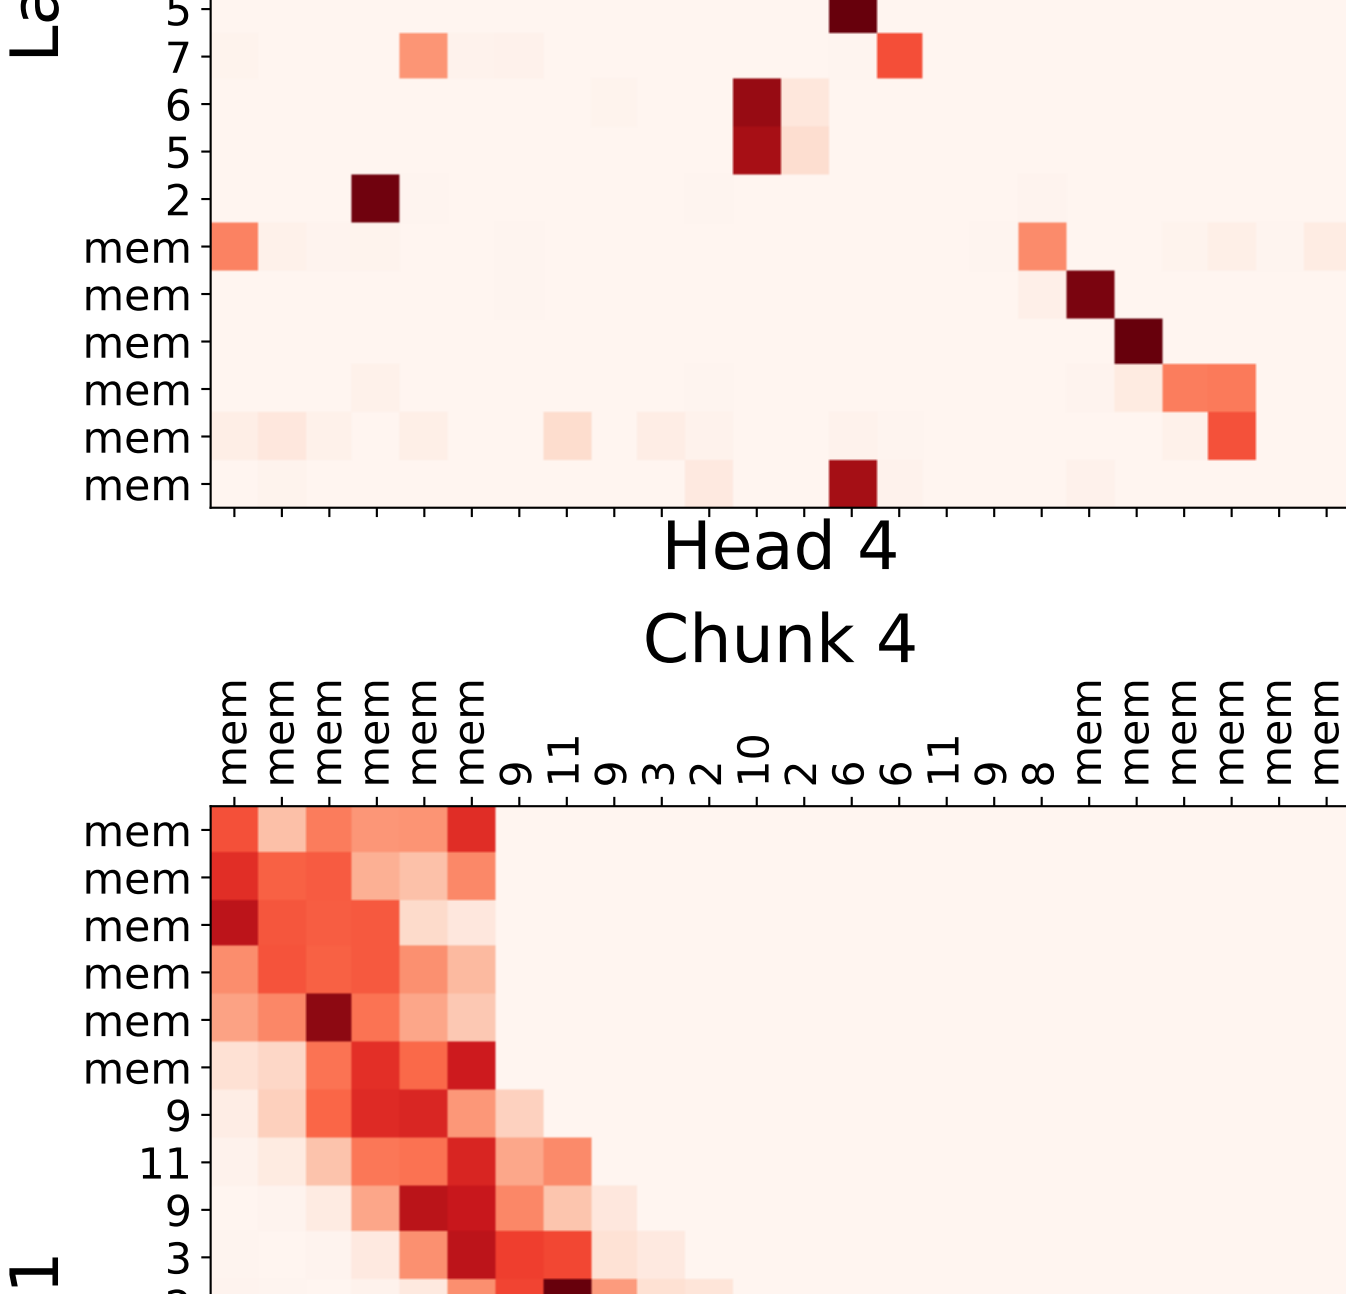

Head 4  
Chunk 4

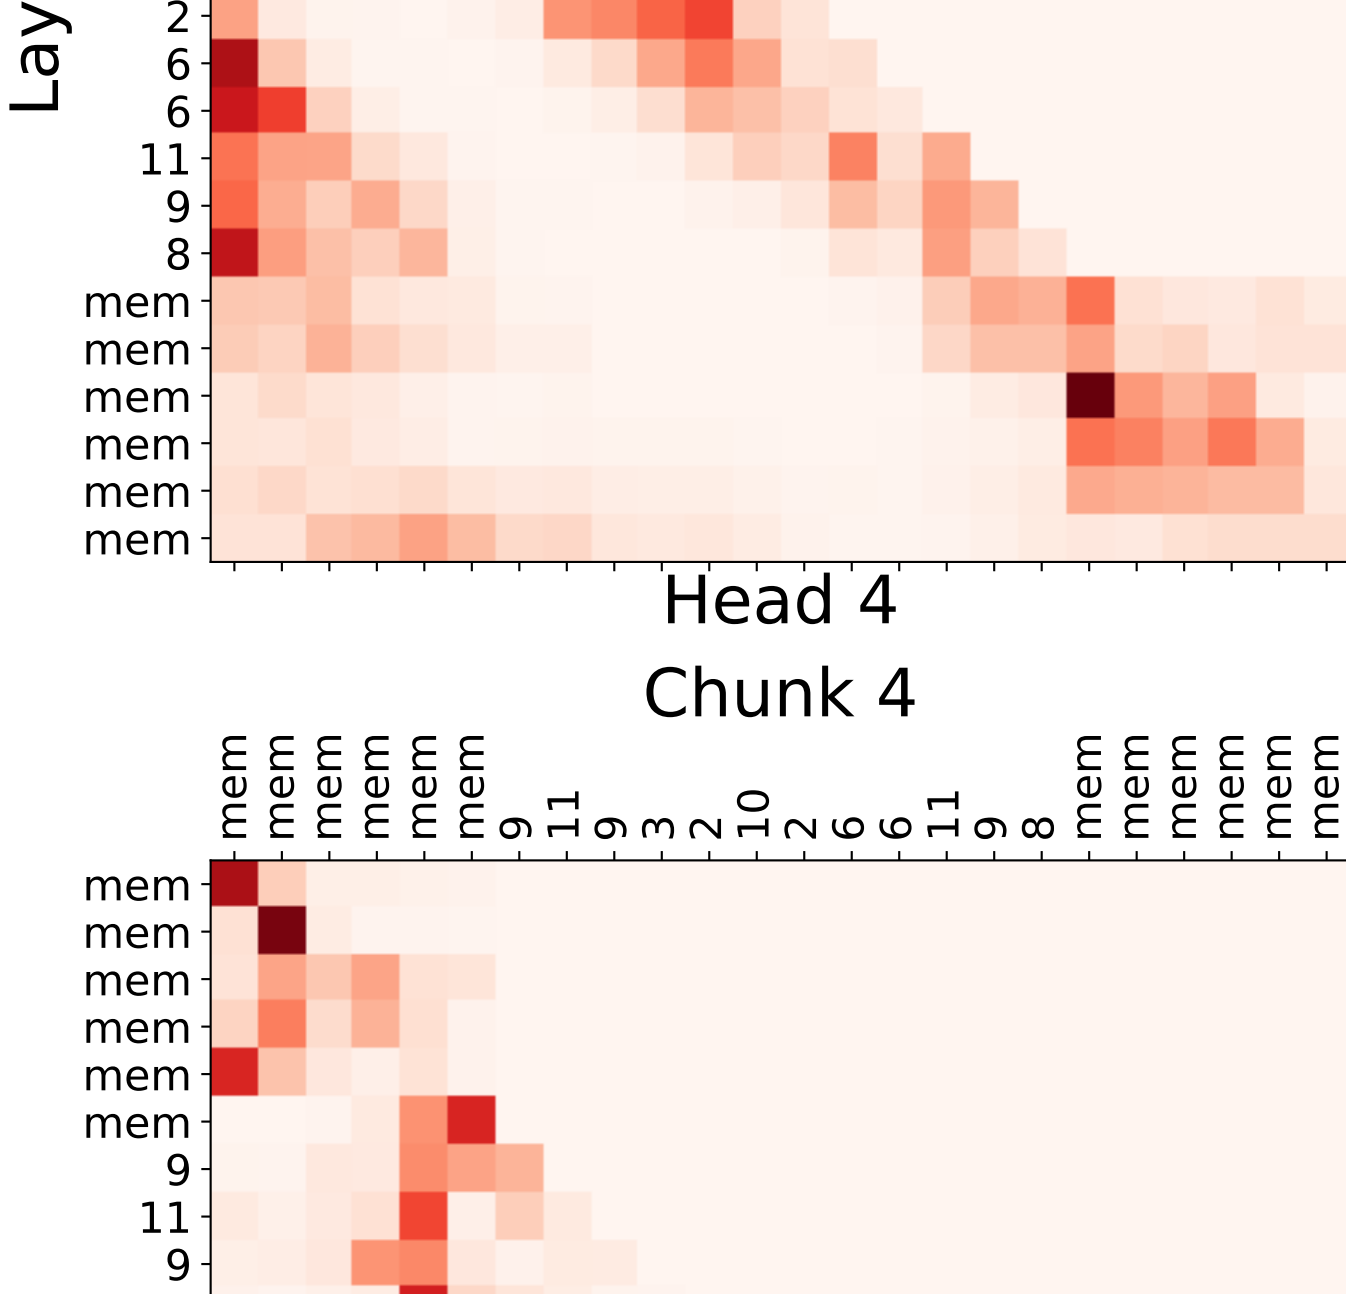

Head 4

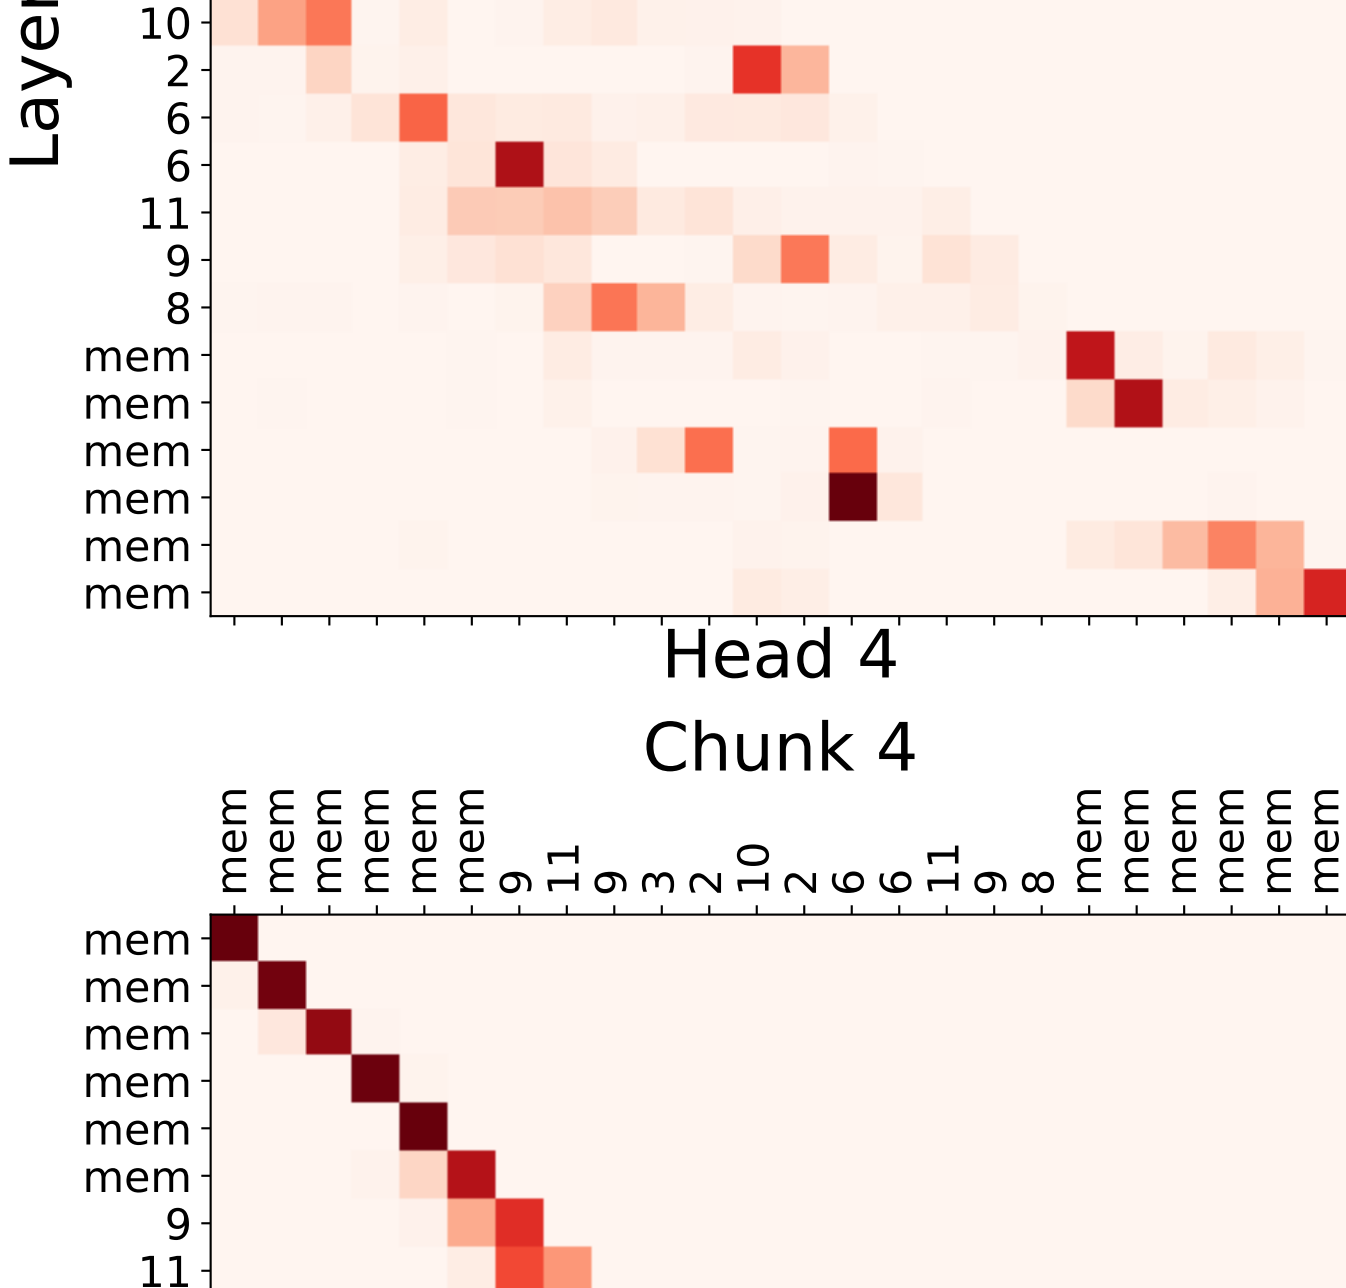

Head 4

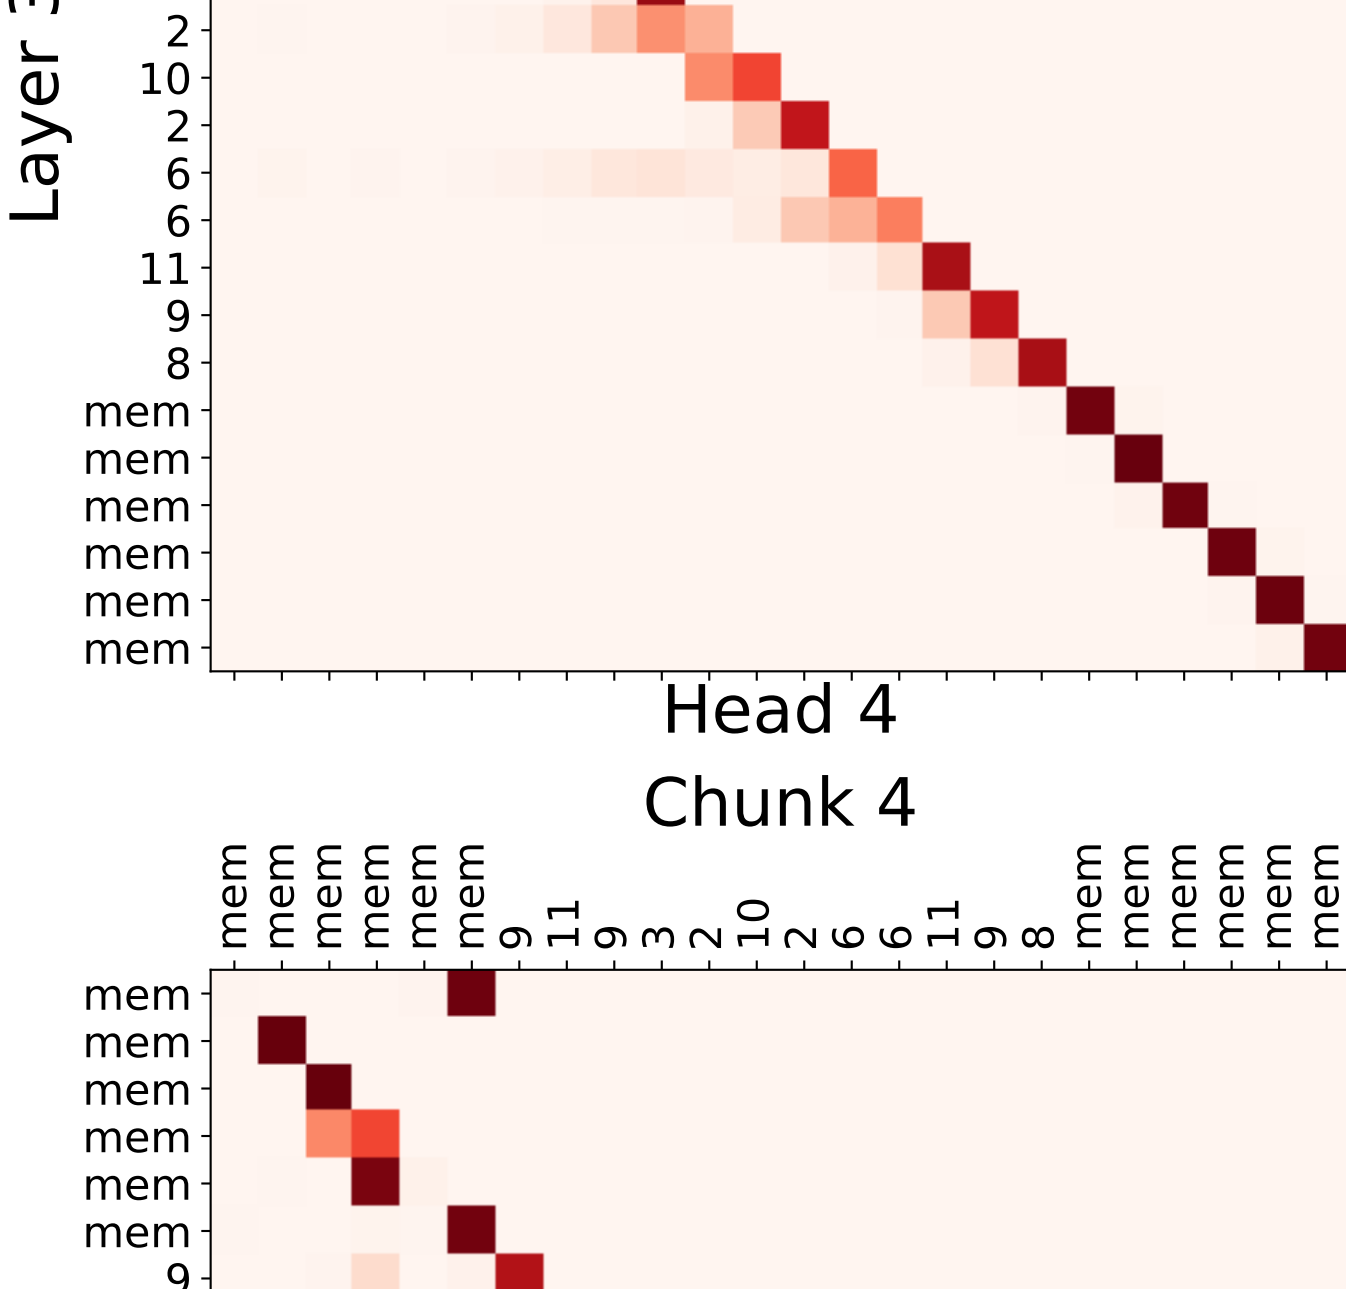

Supplement: supplementary_material [file attachment]
